# Supplementary material for: Correlates and Determinants of Cardiorespiratory Fitness in Adults: a Systematic Review
Source: Sports Med Open. 2019 Sep 3;5:39. doi: 10.1186/s40798-019-0211-2 (PMC6722171; doi:10.1186/s40798-019-0211-2)
Supplement: Supplementary file 2 — Sensitivity Analyses. (PDF 253 kb) [file 40798_2019_211_MOESM2_ESM.pdf]

## **Online Resource 2: Sensitivity Analyses**

### **Correlates and determinants of cardiorespiratory fitness in adults: a systematic review**

**Johannes Zeiher\*, Katherine J. Ombrellaro, Nita Perumal, Thomas Keil, Gert B. M. Mensink, Jonas D. Finger**

\* Corresponding author:

Johannes Zeiher  
Unit of Health Behaviour  
Department of Epidemiology and Health Monitoring  
Robert Koch Institute  
General-Pape-Straße 62-66  
12101 Berlin, Germany  
Email: zeiherj@rki.de

**Tab OR2.1:** Analyses of review results regarding the association of education and cardiorespiratory fitness according to sex

|       | Positive | Negative | Null | Total |
|-------|----------|----------|------|-------|
| Women | 2        | 0        | 2    | 4     |
| Men   | 3        | 0        | 2    | 5     |
| Mixed | 1        | 0        | 0    | 1     |
| Total | 6        | 0        | 4    | 10    |

Fisher's exact:  $p = 1.000$

**Tab OR2.2:** Analyses of review results regarding the association of education and cardiorespiratory fitness (CRF) according to CRF measure

|                 | Positive | Negative | Null | Total |
|-----------------|----------|----------|------|-------|
| Direct Vo2max   | 0        | 0        | 2    | 2     |
| Indirect Vo2max | 4        | 0        | 3    | 7     |
| Other           | 0        | 0        | 1    | 1     |
| Total           | 4        | 0        | 6    | 10    |

Fisher's exact:  $p = 0.467$

**Tab OR2.3:** Analyses of review results regarding the association of education and cardiorespiratory fitness according to test machine

|           | Positive | Negative | Null | Total |
|-----------|----------|----------|------|-------|
| Treadmill | 2        | 0        | 3    | 5     |
| Ergometer | 2        | 0        | 3    | 5     |
| Total     | 4        | 0        | 6    | 10    |

Fisher's exact:  $p = 1.000$

**Tab OR2.4:** Analyses of review results regarding the association of age and cardiorespiratory fitness according to sex

|       | Positive | Negative | Null | Total |
|-------|----------|----------|------|-------|
| Women | 0        | 13       | 2    | 15    |
| Men   | 1        | 19       | 1    | 21    |
| Mixed | 1        | 6        | 0    | 7     |
| Total | 2        | 38       | 3    | 43    |

Fisher's exact:  $p = 0.522$

**Tab OR2.5** Analyses of review results regarding the association of age and cardiorespiratory fitness (CRF) according to CRF measure

|                 | Positive | Negative | Null | Total |
|-----------------|----------|----------|------|-------|
| Direct Vo2max   | 1        | 26       | 0    | 27    |
| Indirect Vo2max | 0        | 6        | 1    | 7     |
| Other           | 1        | 6        | 2    | 9     |
| Total           | 2        | 38       | 3    | 43    |

Fisher's exact:  $p = 0.055$

**Tab OR2.6:** Analyses of review results regarding the association of age and cardiorespiratory fitness according to test machine

|           | Positive | Negative | Null | Total |
|-----------|----------|----------|------|-------|
| Treadmill | 1        | 23       | 2    | 26    |
| Ergometer | 1        | 15       | 1    | 17    |
| Total     | 2        | 38       | 3    | 43    |

Fisher's exact:  $p = 1.000$

**Tab OR2.7:** Analyses of review results regarding the association of body mass index and cardiorespiratory fitness according to sex

|       | Positive | Negative | Null | Total |
|-------|----------|----------|------|-------|
| Women | 0        | 9        | 1    | 10    |
| Men   | 2        | 9        | 2    | 13    |
| Mixed | 1        | 0        | 0    | 1     |
| Total | 3        | 18       | 3    | 24    |

Fisher's exact:  $p = 0.215$

**Tab OR2.8:** Analyses of review results regarding the association of body mass index and cardiorespiratory fitness (CRF) according to CRF measure

|                 | Positive | Negative | Null | Total |
|-----------------|----------|----------|------|-------|
| Direct Vo2max   | 1        | 8        | 0    | 9     |
| Indirect Vo2max | 0        | 3        | 3    | 6     |
| Other           | 2        | 5        | 0    | 7     |
| Total           | 3        | 16       | 3    | 22    |

Fisher's exact:  $p = 0.034$

**Tab OR2.9:** Analyses of review results regarding the association of body mass index and cardiorespiratory fitness according to test machine

|           | Positive | Negative | Null | Total |
|-----------|----------|----------|------|-------|
| Treadmill | 0        | 13       | 1    | 14    |
| Ergometer | 3        | 5        | 2    | 10    |
| Total     | 3        | 16       | 3    | 24    |

Fisher's exact:  $p = 0.091$

**Tab OR2.10** Analyses of review results regarding the association of body mass index and cardiorespiratory fitness (CRF) according to body weight adjustment of CRF measure

|                         | Positive | Negative | Null | Total |
|-------------------------|----------|----------|------|-------|
| CRF adj. for weight     | 2        | 13       | 3    | 18    |
| CRF not adj. for weight | 1        | 5        | 0    | 6     |
| Total                   | 3        | 18       | 3    | 24    |

Fisher's exact:  $p = 0.795$

**Tab OR2.11:** Analyses of review results regarding the association of physical activity index and cardiorespiratory fitness according to sex

|       | Positive | Negative | Null | Total |
|-------|----------|----------|------|-------|
| Women | 5        | 0        | 2    | 7     |
| Men   | 8        | 0        | 3    | 11    |
| Mixed | 1        | 0        | 0    | 1     |
| Total | 14       | 0        | 5    | 19    |

Fisher's exact:  $p = 1.000$

**Tab OR2.12** Analyses of review results regarding the association of physical activity index and cardiorespiratory fitness (CRF) according to CRF measure

|                 | Positive | Negative | Null | Total |
|-----------------|----------|----------|------|-------|
| Direct Vo2max   | 5        | 0        | 5    | 10    |
| Indirect Vo2max | 0        | 0        | 0    | 0     |
| Other           | 9        | 0        | 0    | 3     |
| Total           | 14       | 0        | 5    | 19    |

Fisher's exact:  $p = 0.033$

**Tab OR2.13:** Analyses of review results regarding the association of physical activity index and cardiorespiratory fitness according to test machine

|           | Positive | Negative | Null | Total |
|-----------|----------|----------|------|-------|
| Treadmill | 12       | 0        | 4    | 16    |
| Ergometer | 2        | 0        | 1    | 3     |
| Total     | 14       | 0        | 5    | 19    |

Fisher's exact:  $p = 1.000$

**Tab OR2.14:** Analyses of review results regarding the association of smoking and cardiorespiratory fitness according to sex

|       | Positive | Negative | Null | Total |
|-------|----------|----------|------|-------|
| Women | 1        | 4        | 3    | 8     |
| Men   | 0        | 8        | 4    | 12    |
| Mixed | 0        | 1        | 1    | 2     |
| Total | 1        | 13       | 8    | 22    |

Fisher's exact:  $p = 0.762$

**Tab OR2.15** Analyses of review results regarding the association of smoking and cardiorespiratory fitness (CRF) according to CRF measure

|                 | Positive | Negative | Null | Total |
|-----------------|----------|----------|------|-------|
| Direct Vo2max   | 0        | 5        | 3    | 8     |
| Indirect Vo2max | 1        | 0        | 3    | 4     |
| Other           | 0        | 8        | 2    | 10    |
| Total           | 1        | 13       | 8    | 22    |

Fisher's exact:  $p = 0.038$

**Tab OR2.16:** Analyses of review results regarding the association of smoking and cardiorespiratory fitness according to test machine

|           | Positive | Negative | Null | Total |
|-----------|----------|----------|------|-------|
| Treadmill | 1        | 9        | 6    | 16    |
| Ergometer | 0        | 4        | 2    | 6     |
| Total     | 1        | 13       | 8    | 22    |

Fisher's exact:  $p = 1.000$

**Tab OR2.17:** Analyses of review results regarding the association of waist circumference and cardiorespiratory fitness according to sex

|       | Positive | Negative | Null | Total |
|-------|----------|----------|------|-------|
| Women | 0        | 4        | 1    | 5     |
| Men   | 0        | 5        | 0    | 5     |
| Mixed | 0        | 0        | 0    | 0     |
| Total | 0        | 9        | 1    | 10    |

Fisher's exact:  $p = 0.500$

**Tab OR2.18** Analyses of review results regarding the association of waist circumference and cardiorespiratory fitness (CRF) according to CRF measure

|                 | Positive | Negative | Null | Total |
|-----------------|----------|----------|------|-------|
| Direct Vo2max   | 0        | 4        | 0    | 4     |
| Indirect Vo2max | 0        | 3        | 1    | 4     |
| Other           | 0        | 0        | 0    | 0     |
| Total           | 0        | 7        | 1    | 8     |

Fisher's exact:  $p = \text{NA} < 10$  samples. Two samples did not report CRF measurement.

**Tab OR2.19:** Analyses of review results regarding the association of waist circumference and cardiorespiratory fitness according to test machine

|           | Positive | Negative | Null | Total |
|-----------|----------|----------|------|-------|
| Treadmill | 0        | 5        | 1    | 6     |
| Ergometer | 0        | 4        | 0    | 4     |
| Total     | 0        | 9        | 1    | 10    |

Fisher's exact:  $p = 0.400$
