# Supplementary material for: Correlates and Determinants of Cardiorespiratory Fitness in Adults: a Systematic Review
Source: Sports Med Open. 2019 Sep 3;5:39. doi: 10.1186/s40798-019-0211-2 (PMC6722171; doi:10.1186/s40798-019-0211-2)
Supplement: Supplementary file 3 — Limited Search Update. (PDF 210 kb) [file 40798_2019_211_MOESM3_ESM.pdf]

**Online Resource 3: Limited Search Update**

**Correlates and determinants of cardiorespiratory fitness in adults: a systematic review**

**Johannes Zeiher\*, Katherine J. Ombrellaro, Nita Perumal, Thomas Keil, Gert B. M. Mensink, Jonas D. Finger**

**\* Corresponding author:**

Johannes Zeiher

Unit of Health Behaviour

Department of Epidemiology and Health Monitoring

Robert Koch Institute

General-Pape-Straße 62-66

12101 Berlin, Germany

Email: [zeiherj@rki.de](mailto:zeiherj@rki.de)

Phone: 0049 30 18754 3775

**Table OR3.1 Results summary: search update**

| Author<br>(Date)<br>[Reference] | Country     | Study<br>design | Sample-size | %<br>female | Age<br>range/<br>mean age<br>(in years) | CRF test                        | Results                                                                                                                                                                                                                                                 |                                                                                                                                                                                                                                                                                                                                                                                            |
|---------------------------------|-------------|-----------------|-------------|-------------|-----------------------------------------|---------------------------------|---------------------------------------------------------------------------------------------------------------------------------------------------------------------------------------------------------------------------------------------------------|--------------------------------------------------------------------------------------------------------------------------------------------------------------------------------------------------------------------------------------------------------------------------------------------------------------------------------------------------------------------------------------------|
| Chen et al.<br>(2017) [159]     | US          | cross-sectional | 3,292       | 48%         | 40-49                                   | submaximal treadmill test       | <b>Men<sup>1</sup></b><br>Ethnicity: <b>+/-</b> <sup>2</sup><br>Diabetes: - (obese)<br>Homocysteine: - (normal weight, overweight)<br>Total cholesterol: <b>0</b> (normal weight) / - (overweight)<br>Vitamin B12: - (obese)<br>Smoking: + (overweight) | <b>Women<sup>1</sup></b><br>Ethnicity: <b>+/-</b> <sup>3</sup><br>Diabetes: + (normal) / <b>0</b> (overweight)<br>Homocysteine: - (normal weight)<br>Folate: + (obese)<br>C-reactive protein: - (obese)<br>Total cholesterol: - (overweight)<br>Hemoglobin: + (overweight) / <b>0</b> (obese)<br>Vitamin B12: - (obese)<br>Smoking: <b>0</b> (overweight)<br>Alcohol intake + (overweight) |
| Jackowski et al. (2017) [160]   | Canada      | longitudinal    | 61          | 38%         | ~47 <sup>4</sup>                        | maximal treadmill test          | Biological age: <b>0</b><br>Biological age <sup>2</sup> : <b>0</b><br>Height : +<br>Sex: <b>0</b><br>Cardiometabolic risk: <b>0</b>                                                                                                                     |                                                                                                                                                                                                                                                                                                                                                                                            |
| Knaeps et al. (2018) [161]      | Netherlands | longitudinal    | 399         | 36%         | 56                                      | maximal cycle ergometer test    | cardiometabolic risk score: -<br>cardiometabolic risk score (no adiposity): -<br>Waist circumference: -<br>Fasting glucose: -<br>HDL cholesterol: +<br>Triglycerides : -<br>Diastolic blood pressure: -<br>Systolic blood pressure: -                   |                                                                                                                                                                                                                                                                                                                                                                                            |
| Shouval et al. (2017) [162]     | Israel      | longitudinal    | 16,334      | 30%         | 46                                      | maximal exercise treadmill test | <b>Men</b><br>Anemia (WHO criteria): <b>0</b><br>Age: -<br>Body mass index: -<br>Lack of physical activity: -<br>Hypertension: -<br>Estimated glomerular filtration rate: -<br>Total cholesterol: -                                                     | <b>Women</b><br>Anemia (WHO criteria): -<br>Age: -<br>Body mass index: -<br>Lack of physical activity: -<br>Hypertension: -<br>Estimated glomerular filtration rate: <b>0</b><br>Total cholesterol: -                                                                                                                                                                                      |

|                                   |             |                 |       |     |       |                                 |                                                                                                                                                                                                                                                                                                                 |                                                                                                                                                                                                                                                                                                                                                      |
|-----------------------------------|-------------|-----------------|-------|-----|-------|---------------------------------|-----------------------------------------------------------------------------------------------------------------------------------------------------------------------------------------------------------------------------------------------------------------------------------------------------------------|------------------------------------------------------------------------------------------------------------------------------------------------------------------------------------------------------------------------------------------------------------------------------------------------------------------------------------------------------|
| Tripette et al. (2018) [163]      | Japan       | cross-sectional | 867   | 86% | 23-88 | maximal ergometer test          | <b>Men</b><br>Caffeine consumption: <b>0</b>                                                                                                                                                                                                                                                                    | <b>Women</b><br>Caffeine consumption: <b>+</b>                                                                                                                                                                                                                                                                                                       |
| Tsou et al. (2018) [164]          | US          | cross-sectional | 449   | 45% | 20-50 | submaximal treadmill test       | <b>Men</b><br>Arachidic Acid: -<br>Docosanoic Acid: -<br>Arachidonic Acid: -<br>Docosatetraenoic Acid: -<br>Age: -<br>Smoking (Y/N): <b>0</b><br>Diastolic blood pressure (mmHg): -<br>Body mass index: <b>0</b><br>C-reactive protein: <b>0</b><br>Homeostatic Model Assessment - Insulin Resistance: <b>0</b> | <b>Women</b><br>Arachidic Acid: <b>0</b><br>Docosanoic Acid: <b>0</b><br>Arachidonic Acid: -<br>Docosatetraenoic Acid: <b>0</b><br>Age: <b>0</b><br>Smoking (Y/N): <b>0</b><br>Diastolic blood pressure (mmHg): <b>0</b><br>Body mass index: <b>0</b><br>C-reactive protein: <b>0</b><br>Homeostatic Model Assessment - Insulin Resistance: <b>0</b> |
| van der Velde et al. (2017) [165] | Netherlands | cross-sectional | 2,024 | 51% | 40-75 | submaximal cycle ergometer test | <b>Men</b><br>Sedentary time: -<br>Sedentary Breaks (10/d): <b>0</b><br>Average Sedentary Bout Duration (min): <b>0</b><br>Prolonged Sedentary Bouts (n/d): <b>0</b>                                                                                                                                            | <b>Women</b><br>Sedentary time: -<br>Sedentary Breaks (10/d): <b>0</b><br>Average Sedentary Bout Duration (min): <b>0</b><br>Prolonged Sedentary Bouts (n/d): <b>0</b>                                                                                                                                                                               |

+: positive association; -: negative association; 0: null association

<sup>1</sup>In this study results were reported stratified for weight status (normal weight, overweight, obese) and potential correlates were only analysed in the multivariable model, if they showed a significant bivariate association (term in parenthesis indicates the strata).

<sup>2</sup>Negative association (Reference: 'non-Hispanic white') of CRF with 'other Hispanic' and 'other race', no association with, 'non-Hispanic black' and 'Mexican american' among normal weight participants; no association with, 'non-Hispanic black', 'Mexican American', 'other Hispanic' and 'other race' among overweight and obese participants.

<sup>3</sup>Negative association (Reference: 'non-Hispanic white') of CRF with 'non-Hispanic black', no association with 'Mexican American', 'other Hispanic' and 'other race' among normal weight participants; no association with, 'non-Hispanic black', 'Mexican American', 'other Hispanic' and 'other race' among overweight participants; negative association of CRF with 'non-Hispanic black' and 'other race', no association with 'Mexican american' and 'other Hispanic' among obese participants.

<sup>4</sup>Mean age for low CRF group (n=26): 48.62; mean age for high CRF group (n=35): 45.99.
