# Supplementary material for: Correlates and Determinants of Cardiorespiratory Fitness in Adults: a Systematic Review
Source: Sports Med Open. 2019 Sep 3;5:39. doi: 10.1186/s40798-019-0211-2 (PMC6722171; doi:10.1186/s40798-019-0211-2)
Supplement: Supplementary file 4 — Data extraction table. (XLSX 215 kb) [file 40798_2019_211_MOESM4_ESM.xlsx]

## Sheet: Data extraction table
																																			x
#			Study Characteristics								Quality Assessment		Study Methods							Population Characteristics			Measurement of Cardiorespiratory Fitness								Measurement of Correlates or Determinants of Fitness
	Control #																														Exposure												Confounding Variables
		Main row	Year	Authors	Title	Study Design	Country	Continent	Study Name	Study Period	QA	%	Research Question(s)	Sample Size	Population Sampling Method	Inclusion Criteria	Exclusion Criteria	Response Rate	Loss to Follow-up	Target Population Under Study	Age Group(s)	Percetage Female	Measure of CRF	Multiple Measures?	Exercise Test Machine	Maximal or Submaximal	Exercise Test Inclusion Criteria	Exercise Test Exclusion Criteria	Exercise Test Protocol	Gas Analyses?	Main Exposure Variables and Unit of Measurement	Age	Sex	Race	Anthropometric	SES	Activity Level	Health Behavior	Comorbidities	Biomakers	Other	Measurement Method/Instrument	Confounding Variables and Unit of Measurement	Age	Sex	Race	Anthropometric	SES	Activity Level
Spalte1	Spalte110	Spalte111	Spalte2	Spalte3	Spalte4	Spalte5	Spalte6	Spalte610	Spalte7	Spalte8	Spalte9	Spalte10	Spalte11	Spalte12	Spalte13	Spalte14	Spalte15	Spalte16	Spalte17	Spalte18	Spalte19	Spalte20	Spalte21	Spalte212	Spalte22	Spalte23	Spalte24	Spalte25	Spalte26	Spalte262	Spalte27	Spalte28	Spalte29	Spalte30	Spalte31	Spalte32	Spalte33	Spalte34	Spalte35	Spalte36	Spalte37	Spalte38	Spalte39	Spalte40	Spalte41	Spalte42	Spalte43	Spalte44	Spalte45
1	1	x	2012	Abramowitz	Lower serum bicarbonate and a higher anion gap are associated with lower cardiorespiratory fitness in young adults	cross-sectional	US	NoA	NHANES	1999-2004	Low	0.988372	To study the association of serum bicarbonate and anion gap with cardiorespiratory fitness	2714	National, stratified, multistage, probability sampling design was used to select participants.	non-institutionalized civilian population	missing data on serum bicarbonate (n=37); a history of emphysema or chronic bronchitis by self-report (n=101); who were pregnant at the time of examination (n=51); had invalid dietary data (n=74); or had missing covariate data (n=225).	82/76% response rate (1999-2000) 84/80% (2001-2002) 79/76 (2003-2004) interviewed/examined	NA	Civilian, non-institutionalized US population.	20-49	NR	VO2max (ml/kg/min)	.	treadmill	submaximal	Participants aged 12-49 years without physical limitations or pre-existing cardiovascular or pulmonary diseases.	physical limitations, cardiovascular conditions and symptoms, asthma symptoms, lung/ breathing conditions and symptoms, and medications including beta-blockers and calcium-channel blockers.	individual (NHANES)	.	Bicarbonate: ≤24 mEq/l 24–25 mEq/l 25.1–26.9 mEq/l ≥27 mEq/l									x		Bicarbonate: phosphoenolpyruvate carboxylase method from 1999 to 2001 and with a pH-sensitive electrode from 2002 to 2004.	age(y), sex, and race/ethnicity( Non-Hispanic White Mexican American Non-Hispanic Black )+ BMI(kg/m^2), poverty (<100% poverty index) , education (<high school diploma), activity level (MET-min/week), 0 <500 500–2000 >2000), smoking status (Never Former Current), estimated dietary potential renal acid load (mEq/day), fasting length (<=2hrs), soft drink consumption (None 1 <2), diuretic use, use o…	x	x	x	x	x	x
1	2		2012	Abramowitz	Lower serum bicarbonate and a higher anion gap are associated with lower cardiorespiratory fitness in young adults	cross-sectional	US		NHANES	1999-2004			To study the association of serum bicarbonate and anion gap with cardiorespiratory fitness	2714	National, stratified, multistage, probability sampling design was used to select participants.	non-institutionalized civilian population	missing data on serum bicarbonate (n=37); a history of emphysema or chronic bronchitis by self-report (n=101); who were pregnant at the time of examination (n=51); had invalid dietary data (n=74); or had missing covariate data (n=225).	82/76% response rate (1999-2000) 84/80% (2001-2002) 79/76 (2003-2004) interviewed/examined	NA	Civilian, non-institutionalized US population.	20-49	NR	VO2max (ml/kg/min)		treadmill	submaximal	Participants aged 12-49 years without physical limitations or pre-existing cardiovascular or pulmonary diseases.	physical limitations, cardiovascular conditions and symptoms, asthma symptoms, lung/ breathing conditions and symptoms, and medications including beta-blockers and calcium-channel blockers.			Anion gap: ≤8.60 mEq/l 8.60–10.25 mEq/l 10.26–11.90 mEq/l ≥11.91 mEq/l									x		Anion gap: AG(initial)= serum sodium(mEq/l)–(serum chloride(mEq/l)þserum bicarbonate(mEq/l)), and was adjusted for serum albumin using the following equation: AG=AG(initial)þ2.5(4–serum albumin(g/dl)).Serum creatinine was measured by a modified kinetic Jaffe´ reaction.	age(y), sex, and race/ethnicity( Non-Hispanic White Mexican American Non-Hispanic Black )+ BMIb(kg/m^2), poverty (<100% poverty index) , education (<high school diploma), activity level (MET-min/week), 0 <500 500–2000 >2000), smoking status (Never Former Current), estimated dietary potential renal acid load (mEq/day), fasting length (<=2hrs), soft drink consumption (None 1 <2), diuretic use, use …	x	x	x	x	x	x
1	3		2012	Abramowitz	Lower serum bicarbonate and a higher anion gap are associated with lower cardiorespiratory fitness in young adults	cross-sectional	US		NHANES	1999-2004			To study the association of serum bicarbonate and anion gap with cardiorespiratory fitness	2714	National, stratified, multistage, probability sampling design was used to select participants.	non-institutionalized civilian population	missing data on serum bicarbonate (n=37); a history of emphysema or chronic bronchitis by self-report (n=101); who were pregnant at the time of examination (n=51); had invalid dietary data (n=74); or had missing covariate data (n=225).	82/76% response rate (1999-2000) 84/80% (2001-2002) 79/76 (2003-2004) interviewed/examined	NA	Civilian, non-institutionalized US population.	20-49	NR	VO2max (ml/kg/min)		treadmill	submaximal	Participants aged 12-49 years without physical limitations or pre-existing cardiovascular or pulmonary diseases.	physical limitations, cardiovascular conditions and symptoms, asthma symptoms, lung/ breathing conditions and symptoms, and medications including beta-blockers and calcium-channel blockers.			Bicarbonate: ≤24 mEq/l 24–25 mEq/l 25.1–26.9 mEq/l ≥27 mEq/l									x		Bicarbonate: phosphoenolpyruvate carboxylase method from 1999 to 2001 and with a pH-sensitive electrode from 2002 to 2004.	age(y), sex, and race/ethnicity( Non-Hispanic White Mexican American Non-Hispanic Black )+ BMI(kg/m^2), poverty (<100% poverty index) , education (<high school diploma), activity level (MET-min/week), 0 <500 500–2000 >2000), smoking status (Never Former Current), estimated dietary potential renal acid load (mEq/day), fasting length (<=2hrs), soft drink consumption (None 1 <2), diuretic use, use o…	x	x	x	x	x	x
1	4		2012	Abramowitz	Lower serum bicarbonate and a higher anion gap are associated with lower cardiorespiratory fitness in young adults	cross-sectional	US		NHANES	1999-2004			To study the association of serum bicarbonate and anion gap with cardiorespiratory fitness	2714	National, stratified, multistage, probability sampling design was used to select participants.	non-institutionalized civilian population	missing data on serum bicarbonate (n=37); a history of emphysema or chronic bronchitis by self-report (n=101); who were pregnant at the time of examination (n=51); had invalid dietary data (n=74); or had missing covariate data (n=225).	82/76% response rate (1999-2000) 84/80% (2001-2002) 79/76 (2003-2004) interviewed/examined	NA	Civilian, non-institutionalized US population.	20-49	NR	VO2max (ml/kg/min)		treadmill	submaximal	Participants aged 12-49 years without physical limitations or pre-existing cardiovascular or pulmonary diseases.	physical limitations, cardiovascular conditions and symptoms, asthma symptoms, lung/ breathing conditions and symptoms, and medications including beta-blockers and calcium-channel blockers.			Anion gap: ≤8.60 mEq/l 8.60–10.25 mEq/l 10.26–11.90 mEq/l ≥11.91 mEq/l									x		Anion gap: AG(initial)= serum sodium(mEq/l)–(serum chloride(mEq/l)þserum bicarbonate(mEq/l)), and was adjusted for serum albumin using the following equation: AG=AG(initial)þ2.5(4–serum albumin(g/dl)).Serum creatinine was measured by a modified kinetic Jaffe´ reaction.	age(y), sex, and race/ethnicity( Non-Hispanic White Mexican American Non-Hispanic Black )+ BMIb(kg/m^2), poverty (<100% poverty index) , education (<high school diploma), activity level (MET-min/week), 0 <500 500–2000 >2000), smoking status (Never Former Current), estimated dietary potential renal acid load (mEq/day), fasting length (<=2hrs), soft drink consumption (None 1 <2), diuretic use, use …	x	x	x	x	x	x
2	5	x	2012	Agarwal	Red cell distribution width, inflammatory markers and cardiorespiratory fitness: Results from the National Health and Nutrition Examination Survey	cross-sectional	US	NoA	NHANES	1999-2004	Low	0.837209	To study the association between red cell distribution width (RDW), inflammatory markers and low exercise capacity.	8324	National, population-based representative probability-based sampling.	Participants aged 12-49 years without physical limitations or pre-existing cardiovascular or pulmonary diseases. [Same as exercise test criteria because study only included NHANES respondents who underwent exercise testing.]	None	82/76% response rate (1999-2000) 84/80% (2001-2002) 79/76 (2003-2004) interviewed/examined	NA	Civilian, non-institutionalized US population.	12-49	0.48	VO2max (ml/kg/min)	.	treadmill	submaximal	Participants aged 12-49 years without physical limitations or pre-existing cardiovascular or pulmonary diseases.	physical limitations, cardiovascular conditions and symptoms, asthma symptoms, lung/ breathing conditions and symptoms, and medications including beta-blockers and calcium-channel blockers.	individual	.	Elevated C-reactive protein (defined as CRP concentration ˃0.5 mg/dL)									x		CRP measured on stored venipuncture samples by latex-enhanced nephelometry with results reported within the range of 0.01-20 mg/dL.	age (y), gender, race (whites, blacks, meixcan-americans, others), Hypertension (systolic blood pressure greater than 140 mmHg, diastolic blood pressure greater than 90 mmHg, self-reported diagnosis of hypertension by physician, or self-reported use of antihypertensive medication). - Hyperlipidemia (total blood cholesterol >200 mg/dL, self-reported diagnosis of hyperlipidemia by physician, or sel…	x	x	x	x
2	6		2012	Agarwal	Red cell distribution width, inflammatory markers and cardiorespiratory fitness: Results from the National Health and Nutrition Examination Survey	cross-sectional	US		NHANES	1999-2004			To study the association between red cell distribution width (RDW), inflammatory markers and low exercise capacity.	8324	NHANES. National, population-based representative probability-based sampling.	Participants aged 12-49 years without physical limitations or pre-existing cardiovascular or pulmonary diseases. [Same as exercise test criteria because study only included NHANES respondents who underwent exercise testing.]	None	82/76% response rate (1999-2000) 84/80% (2001-2002) 79/76 (2003-2004) interviewed/examined	NA	Civilian, non-institutionalized US population.	12-49	0.48	VO2max (ml/kg/min)		treadmill	submaximal	Participants aged 12-49 years without physical limitations or pre-existing cardiovascular or pulmonary diseases.	physical limitations, cardiovascular conditions and symptoms, asthma symptoms, lung/ breathing conditions and symptoms, and medications including beta-blockers and calcium-channel blockers.			Red cell distribution width (Elevated RDW defined as RDW ≥13%)									x		RDW was measured using the Beckman Coulter method of counting and sizing, in combination with an automatic diluting and mixing device for sample processing, and a single beam photometer for hemoglobinometry. RDW = (standard deviation of red cell volume/mean cell volume) x 100, with higher RDW implying a greater variety in red cell sizes.	age (y), gender, race (whites, blacks, meixcan-americans, others), Hypertension (systolic blood pressure greater than 140 mmHg, diastolic blood pressure greater than 90 mmHg, self-reported diagnosis of hypertension by physician, or self-reported use of antihypertensive medication). - Hyperlipidemia (total blood cholesterol >200 mg/dL, self-reported diagnosis of hyperlipidemia by physician, or sel…	x	x	x	x
3	7	x	1966	Allen	Aerobic Capacity and Physiological Fitness of Australian Men	cross-sectional	Australia	OC	NA	NR	High	0.325581	The principal object of this survey was to establish reference standards of aerobic capacities of Australian men.	321	convenience sample from local industry (not stated as such, inferred)	employees from local industry	Men who had recently changed their work classification or who did not fit easily into the classifications: (a) sedentary; (b) light manual; (c) heavy manual. were not included.	NA	NA	employees with a) sedentary; (b) light manual; (c) heavy manual occupations, aged 16-60 years	(a) 16-30 years; (b) 31-45 years; (sedentary and light) (c) 46-60 (heavy manutd only).	0	VO2max (ml/kg/min)	.	cycle	submaximal	NR	None of the subjects engaged in strenuous bodily activity for several hours prior to the test, nor ate a meal within 1 hour nor smoked-within 30 min prior to the test. No subject reported suffering from any febrile illness.		.	Age (a)	x										self report	t, t', b				x
3	8		1966	Allen	Aerobic Capacity and Physiological Fitness of Australian Men	cross-sectional	Australia		NA	NR			The principal object of this survey was to establish reference standards of aerobic capacities of Australian men.	321	convenience sample from local industry (not stated as such, inferred)	employees from local industry	Men who had recently changed their work classification or who did not fit easily into the classifications: (a) sedentary; (b) light manual; (c) heavy manual. were not included.	NA	NA	employees with a) sedentary; (b) light manual; (c) heavy manual occupations, aged 16-60 years	(a) 16-30 years; (b) 31-45 years; (sedentary and light) (c) 46-60 (heavy manutd only).	0	VO2max (ml/kg/min)		cycle	submaximal	NR	None of the subjects engaged in strenuous bodily activity for several hours prior to the test, nor ate a meal within 1 hour nor smoked-within 30 min prior to the test. No subject reported suffering from any febrile illness.			dry-bulb temperature indicator in Fahrenheit (t)										x	dry-bulb temperature in F	a,t',b	x			x
3	9		1966	Allen	Aerobic Capacity and Physiological Fitness of Australian Men	cross-sectional	Australia		NA	NR			The principal object of this survey was to establish reference standards of aerobic capacities of Australian men.	321	convenience sample from local industry (not stated as such, inferred)	employees from local industry	Men who had recently changed their work classification or who did not fit easily into the classifications: (a) sedentary; (b) light manual; (c) heavy manual. were not included.	NA	NA	employees with a) sedentary; (b) light manual; (c) heavy manual occupations, aged 16-60 years	(a) 16-30 years; (b) 31-45 years; (sedentary and light) (c) 46-60 (heavy manutd only).	0	VO2max (ml/kg/min)		cycle	submaximal	NR	None of the subjects engaged in strenuous bodily activity for several hours prior to the test, nor ate a meal within 1 hour nor smoked-within 30 min prior to the test. No subject reported suffering from any febrile illness.			dry-bulb temperature indicator, greater of 70 degrees or dry bulb temp. (t')										x	70 degrees or dry-bulb temperature, whichever is greater (degrees F)	a,t,b	x			x
3	10		1966	Allen	Aerobic Capacity and Physiological Fitness of Australian Men	cross-sectional	Australia		NA	NR			The principal object of this survey was to establish reference standards of aerobic capacities of Australian men.	321	convenience sample from local industry (not stated as such, inferred)	employees from local industry	Men who had recently changed their work classification or who did not fit easily into the classifications: (a) sedentary; (b) light manual; (c) heavy manual. were not included.	NA	NA	employees with a) sedentary; (b) light manual; (c) heavy manual occupations, aged 16-60 years	(a) 16-30 years; (b) 31-45 years; (sedentary and light) (c) 46-60 (heavy manutd only).	0	VO2max (ml/kg/min)		cycle	submaximal	NR	None of the subjects engaged in strenuous bodily activity for several hours prior to the test, nor ate a meal within 1 hour nor smoked-within 30 min prior to the test. No subject reported suffering from any febrile illness.			body shape (b)				x							body shape (Fat, medium, thin - height divided by cubed root of weight (kg))	a,t,t'	x
4	11	x	2011	Ardestani	Relation of vitamin D level to maximal oxygen uptake in adults	cross-sectional	US	NoA	STOMP	2008	Low	0.662791	examine the relationship of vitamin D levels to cardiorespiratory fitness in a larger cohort of men and women.	200	participants recruited from three clinical sites in Massachusetts and Connecticut (Hartford Hospital, University of Massachusetts, and University of Connecticut)	equal numbers of male and female participants will be recruited into the 20 to 39, 40 to 59, and 60 and older age groups because age affects muscle strength and is a potential risk factor for statin myopathy	Participants will be excluded if they have had cancer within 5 years, hepatic disease (ALT >2 times normal), renal disease (creatinine >2 mg/L), diagnosed cardiac disease, peripheral vascular disease, or diabetes mellitus. Those presently or previously treated with lipid-lowering medications will also be excluded to avoid biasing the sample toward those who tolerate statin treatment. Other exclus…	NA	NA	healthy adults	NR	0.54	VO2max (ml/kg/min)	.	treadmill	maximal	NA	cardiac ischemia	modified balk; breath-by-breath analysis	x	Vitamin D ( Serum 25(OH)D, ng/ml)									x		Serum 25(OH)D, which measures combined serum vitamin D2 and D3, was determined using blood collected at the first study visit, using a standard ELISA immunoassay protocol (Clinical Laboratory Partners, Newington, Connecticut).	MVPA:Moderate activities were defined as lighter sports, regular walking, golf, house and yard work.Vigorous activities were defined as any strenuous sports, jogging, aerobic exercise, bicycling on hills and similar activities. (hrs/week, low: 25th (<23 hr/wk, n=49), medium: 25–75th (23–48 hr/wk, n=103) and high: 75th (>48 hr/wk, n=48) percentiles)						x
5	12	x	1992	Babcock	Influence of ageing on aerobic parameters determined from a ramp test	cross-sectional	US	NoA	NA	NR	Medium	0.536585	The primary purpose of this study was to characterize the oxygen kinetics [effective time constant for oxygen uptake (r'IkO2)] in response to a ramp function exercise test in healthy older men and to determine the agerelated changes (across ages 30-84 years). Additionally, maximal oxygen uptake (1202max), the threshold lkO2 of =a sustained increase in blood lactate, estimated by gas exchange as t…	79	Subjects were recruited, across the age groups, using the criteria that habitual daily physical activity was characterized as sedentary, and that none were engaged in systematic exercise training.	The subjects 30-59 years were all employed in sedentary management positions, and the men aged 60-84 years were all retired.	NR	NA	NA	healthy older men	30-84	0	VO2max (l/min)	.	cycle	submaximal	habitual daily physical activity was characterized as sedentary,	none were engaged in systematic exercise training.		x	age (y)	x										NA	NA
5	13		1992	Babcock	Influence of ageing on aerobic parameters determined from a ramp test	cross-sectional	US		NA	NR			The primary purpose of this study was to characterize the oxygen kinetics [effective time constant for oxygen uptake (r'IkO2)] in response to a ramp function exercise test in healthy older men and to determine the agerelated changes (across ages 30-84 years). Additionally, maximal oxygen uptake (1202max), the threshold lkO2 of =a sustained increase in blood lactate, estimated by gas exchange as t…	79	Subjects were recruited, across the age groups, using the criteria that habitual daily physical activity was characterized as sedentary, and that none were engaged in systematic exercise training.	The subjects 30-59 years were all employed in sedentary management positions, and the men aged 60-84 years were all retired.	NR	NA	NA	healthy older men	30-84	0	VO2max (l/min)		cycle	submaximal	habitual daily physical activity was characterized as sedentary,	none were engaged in systematic exercise training.			age (y)	x										NA	NA
5	14		1992	Babcock	Influence of ageing on aerobic parameters determined from a ramp test	cross-sectional	US		NA	NR			The primary purpose of this study was to characterize the oxygen kinetics [effective time constant for oxygen uptake (r'IkO2)] in response to a ramp function exercise test in healthy older men and to determine the agerelated changes (across ages 30-84 years). Additionally, maximal oxygen uptake (1202max), the threshold lkO2 of =a sustained increase in blood lactate, estimated by gas exchange as t…	79	Subjects were recruited, across the age groups, using the criteria that habitual daily physical activity was characterized as sedentary, and that none were engaged in systematic exercise training.	The subjects 30-59 years were all employed in sedentary management positions, and the men aged 60-84 years were all retired.	NR	NA	NA	healthy older men	30-84	0	VO2max (l/min)		cycle	submaximal	habitual daily physical activity was characterized as sedentary,	none were engaged in systematic exercise training.			age (y)	x										NA	NA
6	15	x	1998	Barnekow-Bergkvist_1	Prediction of physical fitness and physical activity level in adulthood by physical performance adolescence and physical activity in - An 18-year follow-up study	longitudinal	Sweden	EU	NA	Start: 1974 Follow-up with ergometer test: 1992	Medium	0.536585	to study the relationships between physical fitness and self-reported physical activity in adulthood and also to what extent anthropometric measures, physical performance, physical activity and socio-demographic characteristics at the age of 16 explain the future level of physical fitness and physical activity in adulthood. An additional aim was to study in what respect these findings differ betw…	278	Six geographic areas in Sweden were systematically selected with regard to climate and population density. In each area, one secondary school region was randomly selected, and subsequently the students were selected randomly.	NR	NR	NR	0.35	Start: 16-year old boys and girls in the first year of upper secondary schools	baseline: 16/Follow-up: 34	0.435	VO2max (ml/kg/min)	.	cycle	submaximal	NR	NR		.	[all measured at age 16] weight (kg)				x							anthropometric measurement	bench press, membership sports club, positive attitude to swimming, working mother					x	x
6	16		1998	Barnekow-Bergkvist_1	Prediction of physical fitness and physical activity level in adulthood by physical performance adolescence and physical activity in - An 18-year follow-up study	longitudinal	Sweden		NA	Start: 1974 Follow-up with ergometer test: 1992			to study the relationships between physical fitness and self-reported physical activity in adulthood and also to what extent anthropometric measures, physical performance, physical activity and socio-demographic characteristics at the age of 16 explain the future level of physical fitness and physical activity in adulthood. An additional aim was to study in what respect these findings differ betw…	278	Six geographic areas in Sweden were systematically selected with regard to climate and population density. In each area, one secondary school region was randomly selected, and subsequently the students were selected randomly.	NR	NR	NR	0.35	Start: 16-year old boys and girls in the first year of upper secondary schools	baseline: 16/Follow-up: 34	0.435	VO2max (ml/kg/min)		cycle	submaximal	NR	NR			positive attitude to swimming										x	questionnaire	bench press, weight, working mother, membership sports club				x	x	x
6	17		1998	Barnekow-Bergkvist_1	Prediction of physical fitness and physical activity level in adulthood by physical performance adolescence and physical activity in - An 18-year follow-up study	longitudinal	Sweden		NA	Start: 1974 Follow-up with ergometer test: 1992			to study the relationships between physical fitness and self-reported physical activity in adulthood and also to what extent anthropometric measures, physical performance, physical activity and socio-demographic characteristics at the age of 16 explain the future level of physical fitness and physical activity in adulthood. An additional aim was to study in what respect these findings differ betw…	278	Six geographic areas in Sweden were systematically selected with regard to climate and population density. In each area, one secondary school region was randomly selected, and subsequently the students were selected randomly.	NR	NR	NR	0.35	Start: 16-year old boys and girls in the first year of upper secondary schools	baseline: 16/Follow-up: 34	0.435	VO2max (ml/kg/min)		cycle	submaximal	NR	NR			mother: working					x						questionnaire	bench press, weight, positive attitude to swimming ,membership sports club				x		x
6	18		1998	Barnekow-Bergkvist_1	Prediction of physical fitness and physical activity level in adulthood by physical performance adolescence and physical activity in - An 18-year follow-up study	longitudinal	Sweden		NA	Start: 1974 Follow-up with ergometer test: 1992			to study the relationships between physical fitness and self-reported physical activity in adulthood and also to what extent anthropometric measures, physical performance, physical activity and socio-demographic characteristics at the age of 16 explain the future level of physical fitness and physical activity in adulthood. An additional aim was to study in what respect these findings differ betw…	278	Six geographic areas in Sweden were systematically selected with regard to climate and population density. In each area, one secondary school region was randomly selected, and subsequently the students were selected randomly.	NR	NR	NR	0.35	Start: 16-year old boys and girls in the first year of upper secondary schools	baseline: 16/Follow-up: 34	0.435	VO2max (ml/kg/min)		cycle	submaximal	NR	NR			bench press (number lifts)											Aerobic fitness: Boys and girls performed a run-walk test in which the distances covered in 9 minutes were measured.	bench press, weight, positive attitude to swimming ,membership sports club
6	19		1998	Barnekow-Bergkvist_1	Prediction of physical fitness and physical activity level in adulthood by physical performance adolescence and physical activity in - An 18-year follow-up study	longitudinal	Sweden		NA	Start: 1974 Follow-up with ergometer test: 1992			to study the relationships between physical fitness and self-reported physical activity in adulthood and also to what extent anthropometric measures, physical performance, physical activity and socio-demographic characteristics at the age of 16 explain the future level of physical fitness and physical activity in adulthood. An additional aim was to study in what respect these findings differ betw…	278	Six geographic areas in Sweden were systematically selected with regard to climate and population density. In each area, one secondary school region was randomly selected, and subsequently the students were selected randomly.	NR	NR	NR	0.35	Start: 16-year old boys and girls in the first year of upper secondary schools	baseline: 16/Follow-up: 34	0.435	VO2max (ml/kg/min)		cycle	submaximal	NR	NR			membership sports club (y)											repeat exposure (2001)
6	20		1998	Barnekow-Bergkvist_1	Prediction of physical fitness and physical activity level in adulthood by physical performance adolescence and physical activity in - An 18-year follow-up study	longitudinal	Sweden		NA	Start: 1974 Follow-up with ergometer test: 1992			to study the relationships between physical fitness and self-reported physical activity in adulthood and also to what extent anthropometric measures, physical performance, physical activity and socio-demographic characteristics at the age of 16 explain the future level of physical fitness and physical activity in adulthood. An additional aim was to study in what respect these findings differ betw…	278	Six geographic areas in Sweden were systematically selected with regard to climate and population density. In each area, one secondary school region was randomly selected, and subsequently the students were selected randomly.	NR	NR	NR	0.35	Start: 16-year old boys and girls in the first year of upper secondary schools	baseline: 16/Follow-up: 34	0.435	VO2max (ml/kg/min)		cycle	submaximal	NR	NR			9 min run (100m)											repeat exposure (2001)
6	21		1998	Barnekow-Bergkvist_1	Prediction of physical fitness and physical activity level in adulthood by physical performance adolescence and physical activity in - An 18-year follow-up study	longitudinal	Sweden		NA	Start: 1974 Follow-up with ergometer test: 1992			to study the relationships between physical fitness and self-reported physical activity in adulthood and also to what extent anthropometric measures, physical performance, physical activity and socio-demographic characteristics at the age of 16 explain the future level of physical fitness and physical activity in adulthood. An additional aim was to study in what respect these findings differ betw…	278	Six geographic areas in Sweden were systematically selected with regard to climate and population density. In each area, one secondary school region was randomly selected, and subsequently the students were selected randomly.	NR	NR	NR	0.35	Start: 16-year old boys and girls in the first year of upper secondary schools	baseline: 16/Follow-up: 34	0.435	VO2max (ml/kg/min)		cycle	submaximal	NR	NR			Soccer and handball (positive attitude)											repeat exposure (2001)
6	22		1998	Barnekow-Bergkvist_1	Prediction of physical fitness and physical activity level in adulthood by physical performance adolescence and physical activity in - An 18-year follow-up study	longitudinal	Sweden		NA	Start: 1974 Follow-up with ergometer test: 1992			to study the relationships between physical fitness and self-reported physical activity in adulthood and also to what extent anthropometric measures, physical performance, physical activity and socio-demographic characteristics at the age of 16 explain the future level of physical fitness and physical activity in adulthood. An additional aim was to study in what respect these findings differ betw…	278	Six geographic areas in Sweden were systematically selected with regard to climate and population density. In each area, one secondary school region was randomly selected, and subsequently the students were selected randomly.	NR	NR	NR	0.35	Start: 16-year old boys and girls in the first year of upper secondary schools	baseline: 16/Follow-up: 34	0.435	VO2max (ml/kg/min)		cycle	submaximal	NR	NR			sargent jump (cm)										x	Maximal dynamic strength was represented by a standing vertical jump measured in centimeters	9 min run, advanced educational level, positive atittude to soccer and handball					x
6	23		1998	Barnekow-Bergkvist_1	Prediction of physical fitness and physical activity level in adulthood by physical performance adolescence and physical activity in - An 18-year follow-up study	longitudinal	Sweden		NA	Start: 1974 Follow-up with ergometer test: 1992			to study the relationships between physical fitness and self-reported physical activity in adulthood and also to what extent anthropometric measures, physical performance, physical activity and socio-demographic characteristics at the age of 16 explain the future level of physical fitness and physical activity in adulthood. An additional aim was to study in what respect these findings differ betw…	278	Six geographic areas in Sweden were systematically selected with regard to climate and population density. In each area, one secondary school region was randomly selected, and subsequently the students were selected randomly.	NR	NR	NR	0.35	Start: 16-year old boys and girls in the first year of upper secondary schools	baseline: 16/Follow-up: 34	0.435	VO2max (ml/kg/min)		cycle	submaximal	NR	NR			advanced educational level					x						questionnaire	9 min run, sargent jump, positive atittude to soccer and handball
7	24	x	2001	Barnekow-Bergkvist_2	Adolescent determinants of cardiovascular risk factors in adult men and women	longitudinal	Sweden	EU	NA	Start: 1974 Follow-up with ergometer test: 1992	Medium	0.536585	To investigate how physical activity, physical performance, and sociodemographic characteristics at the age of 16 are related to adult health habits (physical activity, dietary intake, smoking) and biological risk factors for cardiovascular diseases (being overweight, aerobic fitness, serum lipids, blood pressure)	278	Six geographic areas in Sweden were systematically selected with regard to climate and population density. In each area, one secondary school region was randomly selected, and subsequently the students were selected randomly.	NR	NR	NR	0.35	Start: 16-year old boys and girls in the first year of upper secondary schools	baseline: 15-18/Follow-up: 33-36	0.435	VO2max (ml/kg/min)	.	cycle	submaximal	NR	NR	Test using	.	[All measured at 16-years] Membership of sports club(y/n)						x					Sports: Questionnaire	[All measured at 16-years] Sports: satisfied with sports performance, number sports activities, leisure sports activities, positive attitude about soccer and handball, positive attitude about aerobic exercise Muscular endurance and strength: number of lifts in the bench press test. Barbell was 20kg for men and 12kg for women. Aerobic fitness: Boys and girls performed a run-walk test in which the …				x	x	x
7	25		2001	Barnekow-Bergkvist_2	Adolescent determinants of cardiovascular risk factors in adult men and women	longitudinal	Sweden		NA	Start: 1974 Follow-up with ergometer test: 1992			To investigate how physical activity, physical performance, and sociodemographic characteristics at the age of 16 are related to adult health habits (physical activity, dietary intake, smoking) and biological risk factors for cardiovascular diseases (being overweight, aerobic fitness, serum lipids, blood pressure)	278	Six geographic areas in Sweden were systematically selected with regard to climate and population density. In each area, one secondary school region was randomly selected, and subsequently the students were selected randomly.	NR	NR	NR	0.35	Start: 16-year old boys and girls in the first year of upper secondary schools	baseline: 15-18/Follow-up: 33-36	0.435	VO2max (ml/kg/min)		cycle	submaximal	NR	NR			leisure sports activities (y)						x					Sports: Questionnaire	[All measured at 16-years] Sports: membership sports club, satisfied with sports performance, , positive attitude about soccer and handball, positive attitude about aerobic exercise Muscular endurance and strength: number of lifts in the bench press test. Barbell was 20kg for men and 12kg for women. Anthropometric measurements: BMI (kg/m2) Self report:school program and marks in physical education				x	x	x
7	26		2001	Barnekow-Bergkvist_2	Adolescent determinants of cardiovascular risk factors in adult men and women	longitudinal	Sweden		NA	Start: 1974 Follow-up with ergometer test: 1992			To investigate how physical activity, physical performance, and sociodemographic characteristics at the age of 16 are related to adult health habits (physical activity, dietary intake, smoking) and biological risk factors for cardiovascular diseases (being overweight, aerobic fitness, serum lipids, blood pressure)	278	Six geographic areas in Sweden were systematically selected with regard to climate and population density. In each area, one secondary school region was randomly selected, and subsequently the students were selected randomly.	NR	NR	NR	0.35	Start: 16-year old boys and girls in the first year of upper secondary schools	baseline: 15-18/Follow-up: 33-36	0.435	VO2max (ml/kg/min)		cycle	submaximal	NR	NR			Satisfied with sports performance (yes)										x	Sports: Questionnaire	[All measured at 16-years] Sports: membership sports club, , leisure sports activities, positive attitude about soccer and handball, positive attitude about aerobic exercise Muscular endurance and strength: number of lifts in the bench press test. Barbell was 20kg for men and 12kg for women. Anthropometric measurements: BMI (kg/m2) Self report:school program and marks in physical education				x	x	x
7	27		2001	Barnekow-Bergkvist_2	Adolescent determinants of cardiovascular risk factors in adult men and women	longitudinal	Sweden		NA	Start: 1974 Follow-up with ergometer test: 1992			To investigate how physical activity, physical performance, and sociodemographic characteristics at the age of 16 are related to adult health habits (physical activity, dietary intake, smoking) and biological risk factors for cardiovascular diseases (being overweight, aerobic fitness, serum lipids, blood pressure)	278	Six geographic areas in Sweden were systematically selected with regard to climate and population density. In each area, one secondary school region was randomly selected, and subsequently the students were selected randomly.	NR	NR	NR	0.35	Start: 16-year old boys and girls in the first year of upper secondary schools	baseline: 15-18/Follow-up: 33-36	0.435	VO2max (ml/kg/min)		cycle	submaximal	NR	NR			Soccer and handball (positive attitude)										x	Sports: Questionnaire	[All measured at 16-years] Sports: membership sports club, satisfied with sports performance, number sports activities, leisure sports activities, positive attitude about aerobic exercise Muscular endurance and strength: number of lifts in the bench press test. Barbell was 20kg for men and 12kg for women. Anthropometric measurements: BMI (kg/m2) Self report:school program and marks in physical ed…				x	x	x
7	28		2001	Barnekow-Bergkvist_2	Adolescent determinants of cardiovascular risk factors in adult men and women	longitudinal	Sweden		NA	Start: 1974 Follow-up with ergometer test: 1992			To investigate how physical activity, physical performance, and sociodemographic characteristics at the age of 16 are related to adult health habits (physical activity, dietary intake, smoking) and biological risk factors for cardiovascular diseases (being overweight, aerobic fitness, serum lipids, blood pressure)	278	Six geographic areas in Sweden were systematically selected with regard to climate and population density. In each area, one secondary school region was randomly selected, and subsequently the students were selected randomly.	NR	NR	NR	0.35	Start: 16-year old boys and girls in the first year of upper secondary schools	baseline: 15-18/Follow-up: 33-36	0.435	VO2max (ml/kg/min)		cycle	submaximal	NR	NR			Aerobic exercise (positive attitude)										x	Sports: Questionnaire	[All measured at 16-years] Sports: membership sports club, satisfied with sports performance, , leisure sports activities, positive attitude about soccer and handball, Muscular endurance and strength: number of lifts in the bench press test. Barbell was 20kg for men and 12kg for women. Anthropometric measurements: BMI (kg/m2) Self report:school program and marks in physical education				x	x	x
7	29		2001	Barnekow-Bergkvist_2	Adolescent determinants of cardiovascular risk factors in adult men and women	longitudinal	Sweden		NA	Start: 1974 Follow-up with ergometer test: 1992			To investigate how physical activity, physical performance, and sociodemographic characteristics at the age of 16 are related to adult health habits (physical activity, dietary intake, smoking) and biological risk factors for cardiovascular diseases (being overweight, aerobic fitness, serum lipids, blood pressure)	278	Six geographic areas in Sweden were systematically selected with regard to climate and population density. In each area, one secondary school region was randomly selected, and subsequently the students were selected randomly.	NR	NR	NR	0.35	Start: 16-year old boys and girls in the first year of upper secondary schools	baseline: 15-18/Follow-up: 33-36	0.435	VO2max (ml/kg/min)		cycle	submaximal	NR	NR			BMI (kg/m2) (each unit)				x							clinical measurement	[All measured at 16-years] Sports: membership sports club, satisfied with sports performance,, leisure sports activities, positive attitude about soccer and handball, positive attitude about aerobic exercise Muscular endurance and strength: number of lifts in the bench press test. Barbell was 20kg for men and 12kg for women. Anthropometric measurements: Self report:school program					x	x
7	30		2001	Barnekow-Bergkvist_2	Adolescent determinants of cardiovascular risk factors in adult men and women	longitudinal	Sweden		NA	Start: 1974 Follow-up with ergometer test: 1992			To investigate how physical activity, physical performance, and sociodemographic characteristics at the age of 16 are related to adult health habits (physical activity, dietary intake, smoking) and biological risk factors for cardiovascular diseases (being overweight, aerobic fitness, serum lipids, blood pressure)	278	Six geographic areas in Sweden were systematically selected with regard to climate and population density. In each area, one secondary school region was randomly selected, and subsequently the students were selected randomly.	NR	NR	NR	0.35	Start: 16-year old boys and girls in the first year of upper secondary schools	baseline: 15-18/Follow-up: 33-36	0.435	VO2max (ml/kg/min)		cycle	submaximal	NR	NR			Bench-press (each number lifts)										x	Muscular endurance and strength: Number of sit-ups and the number of lifts in the bench press test. Barbell was 20kg for men and 12kg for women. Maximal static lifting strength was measured in Newton (N) in the two-hand lift test	[All measured at 16-years] Sports: membership sports club, satisfied with sports performance, , leisure sports activities, positive attitude about soccer and handball, positive attitude about aerobic exercise Muscular endurance and strength: number of lifts in the bench press test. Barbell was 20kg for men and 12kg for women. Anthropometric measurements: BMI (kg/m2) Self report:school program and…				x	x	x
7	31		2001	Barnekow-Bergkvist_2	Adolescent determinants of cardiovascular risk factors in adult men and women	longitudinal	Sweden		NA	Start: 1974 Follow-up with ergometer test: 1992			To investigate how physical activity, physical performance, and sociodemographic characteristics at the age of 16 are related to adult health habits (physical activity, dietary intake, smoking) and biological risk factors for cardiovascular diseases (being overweight, aerobic fitness, serum lipids, blood pressure)	278	Six geographic areas in Sweden were systematically selected with regard to climate and population density. In each area, one secondary school region was randomly selected, and subsequently the students were selected randomly.	NR	NR	NR	0.35	Start: 16-year old boys and girls in the first year of upper secondary schools	baseline: 15-18/Follow-up: 33-36	0.435	VO2max (ml/kg/min)		cycle	submaximal	NR	NR			School program (A-level)					x						self report	[All measured at 16-years] Sports: membership sports club, satisfied with sports performance, , leisure sports activities, positive attitude about soccer and handball, positive attitude about aerobic exercise Muscular endurance and strength: number of lifts in the bench press test. Barbell was 20kg for men and 12kg for women. Anthropometric measurements: BMI (kg/m2) Self report:school program and…				x	x	x
8	32	x	2003	Bernaards	A Longitudinal Study on Smoking in Relationship to Fitness and Heart Rate Response	longitudinal	Netherlands	EU	AGAHLS	1977 -2000 (1985-2000 adult measurements)	Medium	0.633333	study smoking in relation to cardiovascular fitness and heart rate response to exercise longitudinally. The reversibility of smoking was investigated by studying smoking status (i.e., never smoker, short-term ex-smoker, long-term ex-smoker, and current smoker) in relation to cardiovascular fitness and heart rate reponse to exercise.	378	students from the first and second grade of two secondary schools in Amsterdam and Purmerend, The Netherlands	NR	Subjects reported to use betablockers	NR	No dropout effects were found between age 13 and 16 (14). From the age of 27 onward, single dropout effects were found with HRrest, body weight, Slopemax, and tobacco consumption. These dropout effects were not consistent over time, were not found in both sexes and, could be due to multiple testing.	men and women aged 13-36 from the Netherlands	13-16, 21, 17, 29, 32, 36	0.53	VO2max (l/min)	x	treadmill	maximal	NR	NR	individual (The slope of the treadmill was in- creased every 2 min until exhaustion while the running speed was kept constant at 8 km·h1. During the treadmill running test, the ECG was monitored telemetrically and continuously and recorded at the end of each minute from the final 15 R-R intervals.)	x	Smoking (light, moderate/heavy, never smokers)							x				self report	time of measurement body height(cm) PA (METS/wk) body weight (KG) time x smoking				x		x
9	33	x	2014	Bijlsma	Diagnostic Criteria for Sarcopenis and physical performance	cross-sectional	Various (European Multi-Center: The Netherlands, Finland, Estonia, France, UK)	EU	MYOAGE	2010-2013	Medium	0.511628	assess which diagnostic criteria for sarcopenia are most assocated with physical performance in 180 young (18-30) and 281 healthy old participants (69-81)	108	Subjects were recruited by focused advertisement in newspaper, third generation university ,association of emeriti, and universities, selecting cognitively active individuals.	Cognitively active	dependent living situation, inability to walk a distance of 250m, presence of morbidity (neurologic disorders, metabolic diseases, rheumativ diseases, recent malignancy, heart failure, severe COPD, hemocoagulation syndromes) use of medication (including immunosuppressive drugs, insulin), immobilization for 1 week during the last 2 months, and orthopedic surgery during the last 2 years or still ca…	NR	NA	Healthy young (18-30) and healthy old adults	18-81	NR	VO2max (ml/kg/min)	.	cycle	submaximal	NR	NR	Astrand fitness test	.	Lean Mass as % total body mass (=Relative muscle mass)				x							to obtain relative muscle mass, lean mass percentage was calculated as lean mass divided by body mass in percentage,	age, sex	x	x
9	34		2014	Bijlsma	Diagnostic Criteria for Sarcopenis and physical performance	cross-sectional	Various (European Multi-Center: The Netherlands, Finland, Estonia, France, UK)		MYOAGE	2010-2013			assess which diagnostic criteria for sarcopenia are most assocated with physical performance in 180 young (18-30) and 281 healthy old participants (69-81)	108	Subjects were recruited by focused advertisement in newspaper, third generation university ,association of emeriti, and universities, selecting cognitively active individuals.	Cognitively active	dependent living situation, inability to walk a distance of 250m, presence of morbidity (neurologic disorders, metabolic diseases, rheumativ diseases, recent malignancy, heart failure, severe COPD, hemocoagulation syndromes) use of medication (including immunosuppressive drugs, insulin), immobilization for 1 week during the last 2 months, and orthopedic surgery during the last 2 years or still ca…	NR	NA	Healthy young (18-30) and healthy old adults	18-82	NR	VO2max (ml/kg/min)		cycle	submaximal	NR	NR	Astrand fitness test		ALM/height squared (kg/m2 in SD) (=Absolute muscle mass=				x							to obtain relative muscle mass, lean mass percentage was calculated as lean mass divided by body mass in percentage,	age, sex	x	x
9	35		2014	Bijlsma	Diagnostic Criteria for Sarcopenis and physical performance	cross-sectional	Various (European Multi-Center: The Netherlands, Finland, Estonia, France, UK)		MYOAGE	2010-2013			assess which diagnostic criteria for sarcopenia are most assocated with physical performance in 180 young (18-30) and 281 healthy old participants (69-81)	108	Subjects were recruited by focused advertisement in newspaper, third generation university ,association of emeriti, and universities, selecting cognitively active individuals.	Cognitively active	dependent living situation, inability to walk a distance of 250m, presence of morbidity (neurologic disorders, metabolic diseases, rheumativ diseases, recent malignancy, heart failure, severe COPD, hemocoagulation syndromes) use of medication (including immunosuppressive drugs, insulin), immobilization for 1 week during the last 2 months, and orthopedic surgery during the last 2 years or still ca…	NR	NA	Healthy young (18-30) and healthy old adults	18-83	NR	VO2max (ml/kg/min)		cycle	submaximal	NR	NR	Astrand fitness test		Total lean mass (kg in SD)				x							to obtain relative muscle mass, lean mass percentage was calculated as lean mass divided by body mass in percentage,	age, sex	x	x
9	36		2014	Bijlsma	Diagnostic Criteria for Sarcopenis and physical performance	cross-sectional	Various (European Multi-Center: The Netherlands, Finland, Estonia, France, UK)		MYOAGE	2010-2013			assess which diagnostic criteria for sarcopenia are most assocated with physical performance in 180 young (18-30) and 281 healthy old participants (69-81)	108	Subjects were recruited by focused advertisement in newspaper, third generation university ,association of emeriti, and universities, selecting cognitively active individuals.	Cognitively active	dependent living situation, inability to walk a distance of 250m, presence of morbidity (neurologic disorders, metabolic diseases, rheumativ diseases, recent malignancy, heart failure, severe COPD, hemocoagulation syndromes) use of medication (including immunosuppressive drugs, insulin), immobilization for 1 week during the last 2 months, and orthopedic surgery during the last 2 years or still ca…	NR	NA	Healthy young (18-30) and healthy old adults	18-84	NR	VO2max (ml/kg/min)		cycle	submaximal	NR	NR	Astrand fitness test		Knee extension torque (Nm in SD) (=Muscle strength)						x					to obtain relative muscle mass, lean mass percentage was calculated as lean mass divided by body mass in percentage,	age, sex, height	x	x				x
9	37		2014	Bijlsma	Diagnostic Criteria for Sarcopenis and physical performance	cross-sectional	Various (European Multi-Center: The Netherlands, Finland, Estonia, France, UK)		MYOAGE	2010-2013			assess which diagnostic criteria for sarcopenia are most assocated with physical performance in 180 young (18-30) and 281 healthy old participants (69-81)	108	Subjects were recruited by focused advertisement in newspaper, third generation university ,association of emeriti, and universities, selecting cognitively active individuals.	Cognitively active	dependent living situation, inability to walk a distance of 250m, presence of morbidity (neurologic disorders, metabolic diseases, rheumativ diseases, recent malignancy, heart failure, severe COPD, hemocoagulation syndromes) use of medication (including immunosuppressive drugs, insulin), immobilization for 1 week during the last 2 months, and orthopedic surgery during the last 2 years or still ca…	NR	NA	Healthy young (18-30) and healthy old adults	18-85	NR	VO2max (ml/kg/min)		cycle	submaximal	NR	NR	Astrand fitness test		Handgrip strength (kg in SD) (=Muscle strength)						x					to obtain relative muscle mass, lean mass percentage was calculated as lean mass divided by body mass in percentage,	age, sex, height	x	x				x
9	38		2014	Bijlsma	Diagnostic Criteria for Sarcopenis and physical performance	cross-sectional	Various (European Multi-Center: The Netherlands, Finland, Estonia, France, UK)		MYOAGE	2010-2013			assess which diagnostic criteria for sarcopenia are most assocated with physical performance in 180 young (18-30) and 281 healthy old participants (69-81)	108	Subjects were recruited by focused advertisement in newspaper, third generation university ,association of emeriti, and universities, selecting cognitively active individuals.	Cognitively active	dependent living situation, inability to walk a distance of 250m, presence of morbidity (neurologic disorders, metabolic diseases, rheumativ diseases, recent malignancy, heart failure, severe COPD, hemocoagulation syndromes) use of medication (including immunosuppressive drugs, insulin), immobilization for 1 week during the last 2 months, and orthopedic surgery during the last 2 years or still ca…	NR	NA	Healthy young (18-30) and healthy old adults	18-81	NR	VO2max (ml/kg/min)		cycle	submaximal	NR	NR	Astrand fitness test		ALM as % total body mass (appendicular lean mass)				x							ALM percentage, as the sum of lean mass of both arms and legs divided by body mass in percentage	age, sex	x	x
10	39	x	2006	Binder	Aortic Augmentation Index Is Inversely Associated With Cardiorespiratory Fitness in Men Without Known Coronary Heart Disease	cross-sectional	US	NoA	NA	2003-2004	Medium	0.511628	to investigate whether Aortic augmentation index is associated with cardiorespiratory fitness in asymptomatic men undergoing screening stress ECG	201	asymptomatic Men referred for a screening exercise ECG	asymptomatic Men referred for a screening exercise ECG	individuals with known CHD or whose exercise ECG was positive for ischemia	NA	NA	men without CHD	26-84	0	VO2max (ml/kg/min)	.	treadmill	NR	NR	NR	individual ?; Breath-by-breath analyses	x	Aortic Augmentation Index (%):										x	Measurement of AIx was performed noninvasively with the Sphygmocor system (AtCor Medical, Sydney, Australia) after an overnight fast and 24 h off of any antihypertensive medications. An ascending aortic pressure waveform was derived from the radial artery waveforms recorded at the wrist using applanation tonometry with a high-fidelity micromanometer (Millar Instruments, Houston, TX) and a previou…	age (y), height (cm), BMI (kg/m2), heart rate (bpm), current smoking, HDL (mg/dl), Body fat(%), Log(MET-min/wk+50)	x			x		x
10	40		2006	Binder	Aortic Augmentation Index Is Inversely Associated With Cardiorespiratory Fitness in Men Without Known Coronary Heart Disease	cross-sectional	US		NA	2003-2004			to investigate whether Aortic augmentation index is associated with cardiorespiratory fitness in asymptomatic men undergoing screening stress ECG	201	asymptomatic Men referred for a screening exercise ECG	asymptomatic Men referred for a screening exercise ECG	individuals with known CHD or whose exercise ECG was positive for ischemia	NA	NA	men without CHD	26-84	0	VO2max (ml/kg/min)		treadmill	NR	NR	NR	individual ?; Breath-by-breath analyses		age	x										self report	height (cm), BMI (kg/m2), heart rate (bpm), current smoking, HDL (mg/dl), Body fat(%), Log(MET-min/wk+50), Aix				x		x
10	41		2006	Binder	Aortic Augmentation Index Is Inversely Associated With Cardiorespiratory Fitness in Men Without Known Coronary Heart Disease	cross-sectional	US		NA	2003-2005			to investigate whether Aortic augmentation index is associated with cardiorespiratory fitness in asymptomatic men undergoing screening stress ECG	202	asymptomatic Men referred for a screening exercise ECG	asymptomatic Men referred for a screening exercise ECG	individuals with known CHD or whose exercise ECG was positive for ischemia	NA	NA	men without CHD	26-85	0	VO2max (ml/kg/min)		treadmill	NR	NR	NR	individual ?; Breath-by-breath analyses		height (cm)				x							by stadiometer	age (y), BMI (kg/m2), heart rate (bpm), current smoking, HDL (mg/dl), Body fat(%), Log(MET-min/wk+50), Aix	x			x		x
10	42		2006	Binder	Aortic Augmentation Index Is Inversely Associated With Cardiorespiratory Fitness in Men Without Known Coronary Heart Disease	cross-sectional	US		NA	2003-2006			to investigate whether Aortic augmentation index is associated with cardiorespiratory fitness in asymptomatic men undergoing screening stress ECG	203	asymptomatic Men referred for a screening exercise ECG	asymptomatic Men referred for a screening exercise ECG	individuals with known CHD or whose exercise ECG was positive for ischemia	NA	NA	men without CHD	26-86	0	VO2max (ml/kg/min)		treadmill	NR	NR	NR	individual ?; Breath-by-breath analyses		PA score Log (MET-min/wk  50)						x					self report To assess physical activity level, the short version of the International Physical Activity Questionnaire (IPAQ) (available at: http://www.ipaq.ki.se/) with a recall period of the previous 7 days, was used.14 A physical activity score was calculated based on the IPAQ recommendations as: 3.3(min walked/week)  4.0(min of moderate activity/ week)  8(min of vigorous activity/week) and c…	age, height (cm), BMI (kg/m2), heart rate (bpm), current smoking, HDL (mg/dl), Body fat(%), Aix	x			x
10	43		2006	Binder	Aortic Augmentation Index Is Inversely Associated With Cardiorespiratory Fitness in Men Without Known Coronary Heart Disease	cross-sectional	US		NA	2003-2004			to investigate whether Aortic augmentation index is associated with cardiorespiratory fitness in asymptomatic men undergoing screening stress ECG	201	asymptomatic Men referred for a screening exercise ECG	asymptomatic Men referred for a screening exercise ECG	individuals with known CHD or whose exercise ECG was positive for ischemia	NA	NA	men without CHD	26-84	0	VO2max (ml/kg/min)		treadmill	NR	NR	NR	individual ?; Breath-by-breath analyses		BMI (kg/m2)				x							Weight was measured by an electronic balance, height by a stadiometer, and body mass index (BMI) was calculated in units of kilogram per meter squared.	age (y), height (cm), heart rate (bpm), current smoking, HDL (mg/dl), Body fat(%), Log(MET-min/wk+50), Aix	x			x		x
10	44		2006	Binder	Aortic Augmentation Index Is Inversely Associated With Cardiorespiratory Fitness in Men Without Known Coronary Heart Disease	cross-sectional	US		NA	2003-2004			to investigate whether Aortic augmentation index is associated with cardiorespiratory fitness in asymptomatic men undergoing screening stress ECG	201	asymptomatic Men referred for a screening exercise ECG	asymptomatic Men referred for a screening exercise ECG	individuals with known CHD or whose exercise ECG was positive for ischemia	NA	NA	men without CHD	26-84	0	VO2max (ml/kg/min)		treadmill	NR	NR	NR	individual ?; Breath-by-breath analyses		Heart rate (bpm)										x	A 12-lead ECG was monitored continuously with heart rate recorded for each minute of exercise and for at least 6 min during the recovery period.	age (y), height (cm), BMI (kg/m2), current smoking, HDL (mg/dl), Body fat(%), Log(MET-min/wk+50), Aix	x			x		x
10	45		2006	Binder	Aortic Augmentation Index Is Inversely Associated With Cardiorespiratory Fitness in Men Without Known Coronary Heart Disease	cross-sectional	US		NA	2003-2004			to investigate whether Aortic augmentation index is associated with cardiorespiratory fitness in asymptomatic men undergoing screening stress ECG	201	asymptomatic Men referred for a screening exercise ECG	asymptomatic Men referred for a screening exercise ECG	individuals with known CHD or whose exercise ECG was positive for ischemia	NA	NA	men without CHD	26-84	0	VO2max (ml/kg/min)		treadmill	NR	NR	NR	individual ?; Breath-by-breath analyses		Body fat (%)				x							Subcutaneous fat in the axillary, triceps, and suprailiac regions was measured by skinfold caliper and percent body fat estimated by the method of Pollock et al.	age (y), height (cm), BMI (kg/m2), heart rate (bpm), current smoking, HDL (mg/dl), Log(MET-min/wk+50), Aix	x			x		x
11	46	x	1989	Blair	Surrogate measures of phzsical actiivty and physical fitness: evidence for sedentary traits of resting tachycardia, obesity, and low vital capacity	cross-sectional	US	NoA	ACLS	1970-1985	Medium	0.511628	explore the usefulness of the three physiologic sedentary trait markets: (overwight >=120% ideal weight), resting tachycardia (>=85 bpm) and low vital capacity (<3 litres in men/<2 in women) in terms of their application in epidemiologic studies. Evaluate the valididty of proposed markers by comparing with maximalPWC from maximal treadmill exerise and with other PA estimates.	19570	patients who self refer for the purpose of prevenetative medical examination and lifestyle counseling. Some patients were refferd by employers, or personal physicians.	male and female patients who attended the Cooper Clinic once between 1970 and 1985	NR	NA	NA	men and women	20-60+	0.2	Exercise test duration (sec)	.	treadmill	maximal	NR	NR	Balke and Ware protocol	.	Relative weight (20-29) (30-39) (40-49) (50-59) (60+)	x			x							Standard physician's scales were used to measure weight.	PA Index (1 = no reported exercise during the past month; 2 = exercise other than walking, jogging, or running; 3 = walking, jogging, or running 1.6-16 km/ week; 4 = walking, jogging, or running 1732 km/week; and 5 = walking, jogging, or running >32 km/week.) resting heart rate (bpm) vital capacity (ml/cm) current somoking						x
11	47		1989	Blair	Surrogate measures of phzsical actiivty and physical fitness: evidence for sedentary traits of resting tachycardia, obesity, and low vital capacity	cross-sectional	US		ACLS	1970-1985			explore the usefulness of the three physiologic sedentary trait markets: (overwight >=120% ideal weight), resting tachycardia (>=85 bpm) and low vital capacity (<3 litres in men/<2 in women) in terms of their application in epidemiologic studies. Evaluate the valididty of proposed markers by comparing with maximalPWC from maximal treadmill exerise and with other PA estimates.	19570	patients who self refer for the purpose of prevenetative medical examination and lifestyle counseling. Some patients were refferd by employers, or personal physicians.	male and female patients who attended the Cooper Clinic once between 1970 and 1985	NR	NA	NA	men and women	20-60+	0.2	Exercise test duration (sec)		treadmill	maximal	NR	NR	Balke and Ware protocol		resting heart rate (bpm) (20-29) (30-39) (40-49) (50-59) (60+)										x	A resting electrocardiogram was administered.	relative weight, PA Index (1 = no reported exercise during the past month; 2 = exercise other than walking, jogging, or running; 3 = walking, jogging, or running 1.6-16 km/ week; 4 = walking, jogging, or running 1732 km/week; and 5 = walking, jogging, or running >32 km/week.) vital capacity (ml/cm) current somoking				x		x
11	48		1989	Blair	Surrogate measures of phzsical actiivty and physical fitness: evidence for sedentary traits of resting tachycardia, obesity, and low vital capacity	cross-sectional	US		ACLS	1970-1985			explore the usefulness of the three physiologic sedentary trait markets: (overwight >=120% ideal weight), resting tachycardia (>=85 bpm) and low vital capacity (<3 litres in men/<2 in women) in terms of their application in epidemiologic studies. Evaluate the valididty of proposed markers by comparing with maximalPWC from maximal treadmill exerise and with other PA estimates.	19570	patients who self refer for the purpose of prevenetative medical examination and lifestyle counseling. Some patients were refferd by employers, or personal physicians.	male and female patients who attended the Cooper Clinic once between 1970 and 1985	NR	NA	NA	men and women	20-60+	0.2	Exercise test duration (sec)		treadmill	maximal	NR	NR	Balke and Ware protocol		vital capacity (ml/cm) (20-29) (30-39) (40-49) (50-59) (60+)										x	Vital capacity was obtained by spirometer with the participant standing (15, 16).	relative weight, PA Index (1 = no reported exercise during the past month; 2 = exercise other than walking, jogging, or running; 3 = walking, jogging, or running 1.6-16 km/ week; 4 = walking, jogging, or running 1732 km/week; and 5 = walking, jogging, or running >32 km/week.) resting heart rate (bpm) current somoking				x		x
11	49		1989	Blair	Surrogate measures of phzsical actiivty and physical fitness: evidence for sedentary traits of resting tachycardia, obesity, and low vital capacity	cross-sectional	US		ACLS	1970-1985			explore the usefulness of the three physiologic sedentary trait markets: (overwight >=120% ideal weight), resting tachycardia (>=85 bpm) and low vital capacity (<3 litres in men/<2 in women) in terms of their application in epidemiologic studies. Evaluate the valididty of proposed markers by comparing with maximalPWC from maximal treadmill exerise and with other PA estimates.	19570	patients who self refer for the purpose of prevenetative medical examination and lifestyle counseling. Some patients were refferd by employers, or personal physicians.	male and female patients who attended the Cooper Clinic once between 1970 and 1985	NR	NA	NA	men and women	20-60+	0.2	Exercise test duration (sec)		treadmill	maximal	NR	NR	Balke and Ware protocol		PA Index (1-5) (20-29) (30-39) (40-49) (50-59) (60+)						x					PA Index (1 = no reported exercise during the past month; 2 = exercise other than walking, jogging, or running; 3 = walking, jogging, or running 1.6-16 km/ week; 4 = walking, jogging, or running 1732 km/week; and 5 = walking, jogging, or running >32 km/week.)	relative weight, resting heart rate (bpm) vital capacity (ml/cm) current somoking				x
11	50		1989	Blair	Surrogate measures of phzsical actiivty and physical fitness: evidence for sedentary traits of resting tachycardia, obesity, and low vital capacity	cross-sectional	US		ACLS	1970-1985			explore the usefulness of the three physiologic sedentary trait markets: (overwight >=120% ideal weight), resting tachycardia (>=85 bpm) and low vital capacity (<3 litres in men/<2 in women) in terms of their application in epidemiologic studies. Evaluate the valididty of proposed markers by comparing with maximalPWC from maximal treadmill exerise and with other PA estimates.	19570	patients who self refer for the purpose of prevenetative medical examination and lifestyle counseling. Some patients were refferd by employers, or personal physicians.	male and female patients who attended the Cooper Clinic once between 1970 and 1985	NR	NA	NA	men and women	20-60+	0.2	Exercise test duration (sec)		treadmill	maximal	NR	NR	Balke and Ware protocol		Current Smoking (20-29) (30-39) (40-49) (50-59) (60+)							x				y/n, self report	relative weight, PA Index (1 = no reported exercise during the past month; 2 = exercise other than walking, jogging, or running; 3 = walking, jogging, or running 1.6-16 km/ week; 4 = walking, jogging, or running 1732 km/week; and 5 = walking, jogging, or running >32 km/week.) resting heart rate (bpm) vital capacity (ml/cm)				x		x
12	51	x	1995	Braun	Alcohol Consumption and Physical Fitness Among Young Adults	cross-sectional	US	NoA	CARDIA	1985-1986	Low	0.8	evaluate the relationship between mean daily ehtanol intake and two perameters of submaximal treadmill teating (time to heart rate 130 and duration of treadmill testing in a biethnic cohort of men and women ages 18-30	4930	For Birmingham, Chicago aand Miineapolis centers, participants were randomly recruited from total community or from selected census tracts in the community. For the Oakland center, participants were randomly recruited from the Kaiser Permanente Health Plan membership	recruited for a cohort balanced by age, ethnicity, sex and education	NR	NR	NA	biethnic men and women	18-30	0.54	time to heart rate 130	.	treadmill	maximal	NR	current ilness or injury, history of exercise-induced asthma, hypertension at rest, cardiac disorder, use of cardiovascular medications, an abnormal ecg.	maximal symptom-limited graded treadmill protocoll (Sidney et al. 1992)	.	Daily ethanol intake (ml)							x				self report	smoking status (1,0), ethanol smoking interaction, age(y), race (white v. black), educational levels (y), examination center, systolic blood pressure (mm hg) sum subscapular and triceps skinfolds (mm), PAH score (unit of heavy and moderate activity/yr)	x		x		x	x
12	52		1995	Braun	Alcohol Consumption and Physical Fitness Among Young Adults	cross-sectional	US		CARDIA	1985-1986			evaluate the relationship between mean daily ehtanol intake and two perameters of submaximal treadmill teating (time to heart rate 130 and duration of treadmill testing in a biethnic cohort of men and women ages 18-30	4930	For Birmingham, Chicago aand Miineapolis centers, participants were randomly recruited from total community or from selected census tracts in the community. For the Oakland center, participants were randomly recruited from the Kaiser Permanente Health Plan membership	recruited for a cohort balanced by age, ethnicity, sex and education	NR	NR	NA	biethnic men and women	18-30	0.54	time to heart rate 130		treadmill	maximal	NR	current ilness or injury, history of exercise-induced asthma, hypertension at rest, cardiac disorder, use of cardiovascular medications, an abnormal ecg.	maximal symptom-limited graded treadmill protocoll (Sidney et al. 1992)		smoking status (current/former)							x				smoking status (1,0),	dailyl ethanol intake ethanol smoking interaction, age(y), race (ctwhite v. black), educational levels (y), examination center, systolic blood pressure (mm hg) sum subscapular and triceps skinfolds (mm), PAH score (unit of heavy and moderate activity/yr)	x		x		x	x
12	53		1995	Braun	Alcohol Consumption and Physical Fitness Among Young Adults	cross-sectional	US		CARDIA	1985-1986			evaluate the relationship between mean daily ehtanol intake and two perameters of submaximal treadmill teating (time to heart rate 130 and duration of treadmill testing in a biethnic cohort of men and women ages 18-30	4930	For Birmingham, Chicago aand Miineapolis centers, participants were randomly recruited from total community or from selected census tracts in the community. For the Oakland center, participants were randomly recruited from the Kaiser Permanente Health Plan membership	recruited for a cohort balanced by age, ethnicity, sex and education	NR	NR	NA	biethnic men and women	18-30	0.54	time to heart rate 130		treadmill	maximal	NR	current ilness or injury, history of exercise-induced asthma, hypertension at rest, cardiac disorder, use of cardiovascular medications, an abnormal ecg.	maximal symptom-limited graded treadmill protocoll (Sidney et al. 1992)		ethanol smoking Interaction							x				ethanol smoking status,	daily ethanol intake, smoking status (1,0), age(y), race (white v. black), educational levels (y), examination center, systolic blood pressure (mm hg) sum subscapular and triceps skinfolds (mm), PAH score (unit of heavy and moderate activity/yr)	x		x		x	x
12	54		1995	Braun	Alcohol Consumption and Physical Fitness Among Young Adults	cross-sectional	US		CARDIA	1985-1986			evaluate the relationship between mean daily ehtanol intake and two perameters of submaximal treadmill teating (time to heart rate 130 and duration of treadmill testing in a biethnic cohort of men and women ages 18-30	4930	For Birmingham, Chicago aand Miineapolis centers, participants were randomly recruited from total community or from selected census tracts in the community. For the Oakland center, participants were randomly recruited from the Kaiser Permanente Health Plan membership	recruited for a cohort balanced by age, ethnicity, sex and education	NR	NR	NA	biethnic men and women	18-30	0.54	time to heart rate 130		treadmill	maximal	NR	current ilness or injury, history of exercise-induced asthma, hypertension at rest, cardiac disorder, use of cardiovascular medications, an abnormal ecg.	maximal symptom-limited graded treadmill protocoll (Sidney et al. 1992)		age(y)	x										self report	daily ethanol intake, smoking status (1,0), ethanol smoking interaction, race (white v. black), educational levels (y), examination center, systolic blood pressure (mm hg) sum subscapular and triceps skinfolds (mm), PAH score (unit of heavy and moderate activity/yr)			x		x	x
12	55		1995	Braun	Alcohol Consumption and Physical Fitness Among Young Adults	cross-sectional	US		CARDIA	1985-1986			evaluate the relationship between mean daily ehtanol intake and two perameters of submaximal treadmill teating (time to heart rate 130 and duration of treadmill testing in a biethnic cohort of men and women ages 18-30	4930	For Birmingham, Chicago aand Miineapolis centers, participants were randomly recruited from total community or from selected census tracts in the community. For the Oakland center, participants were randomly recruited from the Kaiser Permanente Health Plan membership	recruited for a cohort balanced by age, ethnicity, sex and education	NR	NR	NA	biethnic men and women	18-30	0.54	time to heart rate 130		treadmill	maximal	NR	current ilness or injury, history of exercise-induced asthma, hypertension at rest, cardiac disorder, use of cardiovascular medications, an abnormal ecg.	maximal symptom-limited graded treadmill protocoll (Sidney et al. 1992)		race (white v. black)			x								self report	daily ethanol intake, smoking status (1,0), ethanol smoking interaction, age(y), educational levels (y), examination center, systolic blood pressure (mm hg) sum subscapular and triceps skinfolds (mm), PAH score (unit of heavy and moderate activity/yr)	x				x	x
12	56		1995	Braun	Alcohol Consumption and Physical Fitness Among Young Adults	cross-sectional	US		CARDIA	1985-1986			evaluate the relationship between mean daily ehtanol intake and two perameters of submaximal treadmill teating (time to heart rate 130 and duration of treadmill testing in a biethnic cohort of men and women ages 18-30	4930	For Birmingham, Chicago aand Miineapolis centers, participants were randomly recruited from total community or from selected census tracts in the community. For the Oakland center, participants were randomly recruited from the Kaiser Permanente Health Plan membership	recruited for a cohort balanced by age, ethnicity, sex and education	NR	NR	NA	biethnic men and women	18-30	0.54	time to heart rate 130		treadmill	maximal	NR	current ilness or injury, history of exercise-induced asthma, hypertension at rest, cardiac disorder, use of cardiovascular medications, an abnormal ecg.	maximal symptom-limited graded treadmill protocoll (Sidney et al. 1992)		education					x						self report	daily ethanol intake, smoking status (1,0), ethanol smoking interaction, age(y), race (b/w), examination center, systolic blood pressure (mm hg) sum subscapular and triceps skinfolds (mm), PAH score (unit of heavy and moderate activity/yr)	x		x			x
12	57		1995	Braun	Alcohol Consumption and Physical Fitness Among Young Adults	cross-sectional	US		CARDIA	1985-1986			evaluate the relationship between mean daily ehtanol intake and two perameters of submaximal treadmill teating (time to heart rate 130 and duration of treadmill testing in a biethnic cohort of men and women ages 18-30	4930	For Birmingham, Chicago aand Miineapolis centers, participants were randomly recruited from total community or from selected census tracts in the community. For the Oakland center, participants were randomly recruited from the Kaiser Permanente Health Plan membership	recruited for a cohort balanced by age, ethnicity, sex and education	NR	NR	NA	biethnic men and women	18-30	0.54	time to heart rate 130		treadmill	maximal	NR	current ilness or injury, history of exercise-induced asthma, hypertension at rest, cardiac disorder, use of cardiovascular medications, an abnormal ecg.	maximal symptom-limited graded treadmill protocoll (Sidney et al. 1992)		Examination Center										x	examination center,	daily ethanol intake, smoking status (1,0), ethanol smoking interaction, age(y), race (white v. black), educational levels (y), systolic blood pressure (mm hg) sum subscapular and triceps skinfolds (mm), PAH score (unit of heavy and moderate activity/yr)	x		x		x	x
12	58		1995	Braun	Alcohol Consumption and Physical Fitness Among Young Adults	cross-sectional	US		CARDIA	1985-1986			evaluate the relationship between mean daily ehtanol intake and two perameters of submaximal treadmill teating (time to heart rate 130 and duration of treadmill testing in a biethnic cohort of men and women ages 18-30	4930	For Birmingham, Chicago aand Miineapolis centers, participants were randomly recruited from total community or from selected census tracts in the community. For the Oakland center, participants were randomly recruited from the Kaiser Permanente Health Plan membership	recruited for a cohort balanced by age, ethnicity, sex and education	NR	NR	NA	biethnic men and women	18-30	0.54	time to heart rate 130		treadmill	maximal	NR	current ilness or injury, history of exercise-induced asthma, hypertension at rest, cardiac disorder, use of cardiovascular medications, an abnormal ecg.	maximal symptom-limited graded treadmill protocoll (Sidney et al. 1992)		Systolic blood pressure										x	systolic blood pressure (mm hg)	daily ethanol intake, smoking status (1,0), ethanol smoking interaction, age(y), race (white v. black), educational levels (y), examination center, sum subscapular and triceps skinfolds (mm), PAH score (unit of heavy and moderate activity/yr)	x		x		x	x
12	59		1995	Braun	Alcohol Consumption and Physical Fitness Among Young Adults	cross-sectional	US		CARDIA	1985-1986			evaluate the relationship between mean daily ehtanol intake and two perameters of submaximal treadmill teating (time to heart rate 130 and duration of treadmill testing in a biethnic cohort of men and women ages 18-30	4930	For Birmingham, Chicago aand Miineapolis centers, participants were randomly recruited from total community or from selected census tracts in the community. For the Oakland center, participants were randomly recruited from the Kaiser Permanente Health Plan membership	recruited for a cohort balanced by age, ethnicity, sex and education	NR	NR	NA	biethnic men and women	18-30	0.54	time to heart rate 130		treadmill	maximal	NR	current ilness or injury, history of exercise-induced asthma, hypertension at rest, cardiac disorder, use of cardiovascular medications, an abnormal ecg.	maximal symptom-limited graded treadmill protocoll (Sidney et al. 1992)		sum subscapular				x							sum subscapular and triceps skinfolds (mm),	daily ethanol intake, smoking status (1,0), ethanol smoking interaction, age(y), race (white v. black), educational levels (y), examination center, systolic blood pressure (mm hg), PAH score (unit of heavy and moderate activity/yr)	x		x		x	x
12	60		1995	Braun	Alcohol Consumption and Physical Fitness Among Young Adults	cross-sectional	US		CARDIA	1985-1986			evaluate the relationship between mean daily ehtanol intake and two perameters of submaximal treadmill teating (time to heart rate 130 and duration of treadmill testing in a biethnic cohort of men and women ages 18-30	4930	For Birmingham, Chicago aand Miineapolis centers, participants were randomly recruited from total community or from selected census tracts in the community. For the Oakland center, participants were randomly recruited from the Kaiser Permanente Health Plan membership	recruited for a cohort balanced by age, ethnicity, sex and education	NR	NR	NA	biethnic men and women	18-30	0.54	time to heart rate 130		treadmill	maximal	NR	current ilness or injury, history of exercise-induced asthma, hypertension at rest, cardiac disorder, use of cardiovascular medications, an abnormal ecg.	maximal symptom-limited graded treadmill protocoll (Sidney et al. 1992)		PAH						x					PAH score (unit of heavy and moderate activity/yr)	daily ethanol intake, smoking status (1,0), ethanol smoking interaction, age(y), race (white v. black), educational levels (y), examination center, systolic blood pressure (mm hg), sum subscapular	x		x		x
12	61		1995	Braun	Alcohol Consumption and Physical Fitness Among Young Adults	cross-sectional	US		CARDIA	1985-1986			evaluate the relationship between mean daily ehtanol intake and two perameters of submaximal treadmill teating (time to heart rate 130 and duration of treadmill testing in a biethnic cohort of men and women ages 18-30	4930	For Birmingham, Chicago aand Miineapolis centers, participants were randomly recruited from total community or from selected census tracts in the community. For the Oakland center, participants were randomly recruited from the Kaiser Permanente Health Plan membership	recruited for a cohort balanced by age, ethnicity, sex and education	NR	NR	NA	biethnic men and women	18-30	0.54	duration treadmill testing		treadmill	maximal	NR	current ilness or injury, history of exercise-induced asthma, hypertension at rest, cardiac disorder, use of cardiovascular medications, an abnormal ecg.	maximal symptom-limited graded treadmill protocoll (Sidney et al. 1992)		Daily ethanol intake (ml)							x				self report	smoking status (1,0), age(y), race (white v. black), educational levels (y), systolic blood pressure (mm hg) sum subscapular and triceps skinfolds (mm), PAH score (unit of heavy and moderate activity/yr)	x	x	x		x	x
12	62		1995	Braun	Alcohol Consumption and Physical Fitness Among Young Adults	cross-sectional	US		CARDIA	1985-1986			evaluate the relationship between mean daily ehtanol intake and two perameters of submaximal treadmill teating (time to heart rate 130 and duration of treadmill testing in a biethnic cohort of men and women ages 18-30	4930	For Birmingham, Chicago aand Miineapolis centers, participants were randomly recruited from total community or from selected census tracts in the community. For the Oakland center, participants were randomly recruited from the Kaiser Permanente Health Plan membership	recruited for a cohort balanced by age, ethnicity, sex and education	NR	NR	NA	biethnic men and women	18-30	0.54	duration treadmill testing		treadmill	maximal	NR	current ilness or injury, history of exercise-induced asthma, hypertension at rest, cardiac disorder, use of cardiovascular medications, an abnormal ecg.	maximal symptom-limited graded treadmill protocoll (Sidney et al. 1992)		smoking status							x				smoking status (1,0),	daily ethanol intake, age(y), race (white v. black), educational levels (y), systolic blood pressure (mm hg) sum subscapular and triceps skinfolds (mm), PAH score (unit of heavy and moderate activity/yr)	x	x	x		x	x
12	63		1995	Braun	Alcohol Consumption and Physical Fitness Among Young Adults	cross-sectional	US		CARDIA	1985-1986			evaluate the relationship between mean daily ehtanol intake and two perameters of submaximal treadmill teating (time to heart rate 130 and duration of treadmill testing in a biethnic cohort of men and women ages 18-30	4930	For Birmingham, Chicago aand Miineapolis centers, participants were randomly recruited from total community or from selected census tracts in the community. For the Oakland center, participants were randomly recruited from the Kaiser Permanente Health Plan membership	recruited for a cohort balanced by age, ethnicity, sex and education	NR	NR	NA	biethnic men and women	18-30	0.54	duration treadmill testing		treadmill	maximal	NR	current ilness or injury, history of exercise-induced asthma, hypertension at rest, cardiac disorder, use of cardiovascular medications, an abnormal ecg.	maximal symptom-limited graded treadmill protocoll (Sidney et al. 1992)		age(y)	x										self report	daily ethanol intake, smoking status (1,0), age(y), race (white v. black), educational levels (y), systolic blood pressure (mm hg) sum subscapular and triceps skinfolds (mm), PAH score (unit of heavy and moderate activity/yr)		x	x		x	x
12	64		1995	Braun	Alcohol Consumption and Physical Fitness Among Young Adults	cross-sectional	US		CARDIA	1985-1986			evaluate the relationship between mean daily ehtanol intake and two perameters of submaximal treadmill teating (time to heart rate 130 and duration of treadmill testing in a biethnic cohort of men and women ages 18-30	4930	For Birmingham, Chicago aand Miineapolis centers, participants were randomly recruited from total community or from selected census tracts in the community. For the Oakland center, participants were randomly recruited from the Kaiser Permanente Health Plan membership	recruited for a cohort balanced by age, ethnicity, sex and education	NR	NR	NA	biethnic men and women	18-30	0.54	duration treadmill testing		treadmill	maximal	NR	current ilness or injury, history of exercise-induced asthma, hypertension at rest, cardiac disorder, use of cardiovascular medications, an abnormal ecg.	maximal symptom-limited graded treadmill protocoll (Sidney et al. 1992)		race (white v. black)			x								self report	daily ethanol intake, smoking status (1,0), age(y), race (white v. black), educational levels (y), systolic blood pressure (mm hg) sum subscapular and triceps skinfolds (mm), PAH score (unit of heavy and moderate activity/yr)	x	x			x	x
12	65		1995	Braun	Alcohol Consumption and Physical Fitness Among Young Adults	cross-sectional	US		CARDIA	1985-1986			evaluate the relationship between mean daily ehtanol intake and two perameters of submaximal treadmill teating (time to heart rate 130 and duration of treadmill testing in a biethnic cohort of men and women ages 18-30	4930	For Birmingham, Chicago aand Miineapolis centers, participants were randomly recruited from total community or from selected census tracts in the community. For the Oakland center, participants were randomly recruited from the Kaiser Permanente Health Plan membership	recruited for a cohort balanced by age, ethnicity, sex and education	NR	NR	NA	biethnic men and women	18-30	0.54	duration treadmill testing		treadmill	maximal	NR	current ilness or injury, history of exercise-induced asthma, hypertension at rest, cardiac disorder, use of cardiovascular medications, an abnormal ecg.	maximal symptom-limited graded treadmill protocoll (Sidney et al. 1992)		education					x						self report	daily ethanol intake, smoking status (1,0), age(y), race (white v. black), systolic blood pressure (mm hg) sum subscapular and triceps skinfolds (mm), PAH score (unit of heavy and moderate activity/yr)	x	x	x			x
12	66		1995	Braun	Alcohol Consumption and Physical Fitness Among Young Adults	cross-sectional	US		CARDIA	1985-1986			evaluate the relationship between mean daily ehtanol intake and two perameters of submaximal treadmill teating (time to heart rate 130 and duration of treadmill testing in a biethnic cohort of men and women ages 18-30	4930	For Birmingham, Chicago aand Miineapolis centers, participants were randomly recruited from total community or from selected census tracts in the community. For the Oakland center, participants were randomly recruited from the Kaiser Permanente Health Plan membership	recruited for a cohort balanced by age, ethnicity, sex and education	NR	NR	NA	biethnic men and women	18-30	0.54	duration treadmill testing		treadmill	maximal	NR	current ilness or injury, history of exercise-induced asthma, hypertension at rest, cardiac disorder, use of cardiovascular medications, an abnormal ecg.	maximal symptom-limited graded treadmill protocoll (Sidney et al. 1992)		Systolic blood pressure										x	systolic blood pressure (mm hg)	daily ethanol intake, smoking status (1,0), age(y), race (white v. black), educational levels (y), sum subscapular and triceps skinfolds (mm), PAH score (unit of heavy and moderate activity/yr)	x	x	x		x	x
12	67		1995	Braun	Alcohol Consumption and Physical Fitness Among Young Adults	cross-sectional	US		CARDIA	1985-1986			evaluate the relationship between mean daily ehtanol intake and two perameters of submaximal treadmill teating (time to heart rate 130 and duration of treadmill testing in a biethnic cohort of men and women ages 18-30	4930	For Birmingham, Chicago aand Miineapolis centers, participants were randomly recruited from total community or from selected census tracts in the community. For the Oakland center, participants were randomly recruited from the Kaiser Permanente Health Plan membership	recruited for a cohort balanced by age, ethnicity, sex and education	NR	NR	NA	biethnic men and women	18-30	0.54	duration treadmill testing		treadmill	maximal	NR	current ilness or injury, history of exercise-induced asthma, hypertension at rest, cardiac disorder, use of cardiovascular medications, an abnormal ecg.	maximal symptom-limited graded treadmill protocoll (Sidney et al. 1992)		sum subscapular				x							sum subscapular and triceps skinfolds (mm),	daily ethanol intake, smoking status (1,0), age(y), race (white v. black), educational levels (y), systolic blood pressure (mm hg), PAH score (unit of heavy and moderate activity/yr)	x	x	x		x	x
12	68		1995	Braun	Alcohol Consumption and Physical Fitness Among Young Adults	cross-sectional	US		CARDIA	1985-1986			evaluate the relationship between mean daily ehtanol intake and two perameters of submaximal treadmill teating (time to heart rate 130 and duration of treadmill testing in a biethnic cohort of men and women ages 18-30	4930	For Birmingham, Chicago aand Miineapolis centers, participants were randomly recruited from total community or from selected census tracts in the community. For the Oakland center, participants were randomly recruited from the Kaiser Permanente Health Plan membership	recruited for a cohort balanced by age, ethnicity, sex and education	NR	NR	NA	biethnic men and women	18-30	0.54	duration treadmill testing		treadmill	maximal	NR	current ilness or injury, history of exercise-induced asthma, hypertension at rest, cardiac disorder, use of cardiovascular medications, an abnormal ecg.	maximal symptom-limited graded treadmill protocoll (Sidney et al. 1992)		PAH						x					PAH score (unit of heavy and moderate activity/yr)	daily ethanol intake, smoking status (1,0), age(y), race (white v. black), educational levels (y), examination center, systolic blood pressure (mm hg) sum subscapular and triceps skinfolds (mm)	x	x	x		x
13	69	x	2010	Cao	Predicting V˙O2max with an Objectively Measured Physical Activity in Japanese Women	cross-sectional	Japan	AS	NA	NR	Medium	0.511628	we hypothesized that the accelerometer-determined PA intensity variables including the time spent in MVPA and VPA are potential predictors of cardiorespiratory fitness in Japanese women. To verify this hypothesis, the relationships between PA intensity variables and V˙ O2max were investigated. More specifically, the purpose ofthis study was to develop new nonexercise V˙ O2max prediction models us…	148	NR	NR	chronic disease or on medications that may affect study variables	NA	NA	Japanese adult women	20-69	1	VO2max (ml/kg/min)	.	cycle	maximal	NR	NR	individual: maximal graded exercise test; (breath by breath analyses)	x	BMI (kg/m2)				x							Body mass index (BMI) was calculated by dividing the body mass in kilograms by the square of height in meters (kgImj2).	SC, age	x					x
13	70		2010	Cao	Predicting V˙O2max with an Objectively Measured Physical Activity in Japanese Women	cross-sectional	Japan		NA	NR			we hypothesized that the accelerometer-determined PA intensity variables including the time spent in MVPA and VPA are potential predictors of cardiorespiratory fitness in Japanese women. To verify this hypothesis, the relationships between PA intensity variables and V˙ O2max were investigated. More specifically, the purpose ofthis study was to develop new nonexercise V˙ O2max prediction models us…	148	NR	NR	chronic disease or on medications that may affect study variables	NA	NA	Japanese adult women	20-69	1	VO2max (ml/kg/min)		cycle	maximal	NR	NR			age (y)	x										self report	BMI, SC				x		x
13	71		2010	Cao	Predicting V˙O2max with an Objectively Measured Physical Activity in Japanese Women	cross-sectional	Japan		NA	NR			we hypothesized that the accelerometer-determined PA intensity variables including the time spent in MVPA and VPA are potential predictors of cardiorespiratory fitness in Japanese women. To verify this hypothesis, the relationships between PA intensity variables and V˙ O2max were investigated. More specifically, the purpose ofthis study was to develop new nonexercise V˙ O2max prediction models us…	148	NR	NR	chronic disease or on medications that may affect study variables	NA	NA	Japanese adult women	20-69	1	VO2max (ml/kg/min)		cycle	maximal	NR	NR			step count (SC, steps/day)						x					PA was measured by activity monitors using a uniaxial acceleration sensor (LC) and a triaxial acceleration sensor (AM	BMI, age	x			x
13	72		2010	Cao	Predicting V˙O2max with an Objectively Measured Physical Activity in Japanese Women	cross-sectional	Japan		NA	NR			we hypothesized that the accelerometer-determined PA intensity variables including the time spent in MVPA and VPA are potential predictors of cardiorespiratory fitness in Japanese women. To verify this hypothesis, the relationships between PA intensity variables and V˙ O2max were investigated. More specifically, the purpose ofthis study was to develop new nonexercise V˙ O2max prediction models us…	148	NR	NR	chronic disease or on medications that may affect study variables	NA	NA	Japanese adult women	20-69	1	VO2max (ml/kg/min)		cycle	maximal	NR	NR			BMI (kg/m2)				x							Body mass index (BMI) was calculated by dividing the body mass in kilograms by the square of height in meters (kgImj2).	age, step count, MVPA	x					x
13	73		2010	Cao	Predicting V˙O2max with an Objectively Measured Physical Activity in Japanese Women	cross-sectional	Japan		NA	NR			we hypothesized that the accelerometer-determined PA intensity variables including the time spent in MVPA and VPA are potential predictors of cardiorespiratory fitness in Japanese women. To verify this hypothesis, the relationships between PA intensity variables and V˙ O2max were investigated. More specifically, the purpose ofthis study was to develop new nonexercise V˙ O2max prediction models us…	148	NR	NR	chronic disease or on medications that may affect study variables	NA	NA	Japanese adult women	20-69	1	VO2max (ml/kg/min)		cycle	maximal	NR	NR			age (y)	x										self report	BMI, step count, MVPA				x		x
13	74		2010	Cao	Predicting V˙O2max with an Objectively Measured Physical Activity in Japanese Women	cross-sectional	Japan		NA	NR			we hypothesized that the accelerometer-determined PA intensity variables including the time spent in MVPA and VPA are potential predictors of cardiorespiratory fitness in Japanese women. To verify this hypothesis, the relationships between PA intensity variables and V˙ O2max were investigated. More specifically, the purpose ofthis study was to develop new nonexercise V˙ O2max prediction models us…	148	NR	NR	chronic disease or on medications that may affect study variables	NA	NA	Japanese adult women	20-69	1	VO2max (ml/kg/min)		cycle	maximal	NR	NR			step count (SC, steps/day)						x					PA was measured by activity monitors using a uniaxial acceleration sensor (LC) and a triaxial acceleration sensor (AM	age, BMI, MVPA	x			x		x
13	75		2010	Cao	Predicting V˙O2max with an Objectively Measured Physical Activity in Japanese Women	cross-sectional	Japan		NA	NR			we hypothesized that the accelerometer-determined PA intensity variables including the time spent in MVPA and VPA are potential predictors of cardiorespiratory fitness in Japanese women. To verify this hypothesis, the relationships between PA intensity variables and V˙ O2max were investigated. More specifically, the purpose ofthis study was to develop new nonexercise V˙ O2max prediction models us…	148	NR	NR	chronic disease or on medications that may affect study variables	NA	NA	Japanese adult women	20-69	1	VO2max (ml/kg/min)		cycle	maximal	NR	NR			MVPA (min)						x					PA was measured by activity monitors using a uniaxial acceleration sensor (LC) and a triaxial acceleration sensor (AM	BMI, age, step count	x			x		x
13	76		2010	Cao	Predicting V˙O2max with an Objectively Measured Physical Activity in Japanese Women	cross-sectional	Japan		NA	NR			we hypothesized that the accelerometer-determined PA intensity variables including the time spent in MVPA and VPA are potential predictors of cardiorespiratory fitness in Japanese women. To verify this hypothesis, the relationships between PA intensity variables and V˙ O2max were investigated. More specifically, the purpose ofthis study was to develop new nonexercise V˙ O2max prediction models us…	148	NR	NR	chronic disease or on medications that may affect study variables	NA	NA	Japanese adult women	20-69	1	VO2max (ml/kg/min)		cycle	maximal	NR	NR			BMI (kg/m2)				x							Body mass index (BMI) was calculated by dividing the body mass in kilograms by the square of height in meters (kgImj2).	age, step count, VPA	x					x
13	77		2010	Cao	Predicting V˙O2max with an Objectively Measured Physical Activity in Japanese Women	cross-sectional	Japan		NA	NR			we hypothesized that the accelerometer-determined PA intensity variables including the time spent in MVPA and VPA are potential predictors of cardiorespiratory fitness in Japanese women. To verify this hypothesis, the relationships between PA intensity variables and V˙ O2max were investigated. More specifically, the purpose ofthis study was to develop new nonexercise V˙ O2max prediction models us…	148	NR	NR	chronic disease or on medications that may affect study variables	NA	NA	Japanese adult women	20-69	1	VO2max (ml/kg/min)		cycle	maximal	NR	NR			age (y)	x										self report	BMI, step count, VPA				x		x
13	78		2010	Cao	Predicting V˙O2max with an Objectively Measured Physical Activity in Japanese Women	cross-sectional	Japan		NA	NR			we hypothesized that the accelerometer-determined PA intensity variables including the time spent in MVPA and VPA are potential predictors of cardiorespiratory fitness in Japanese women. To verify this hypothesis, the relationships between PA intensity variables and V˙ O2max were investigated. More specifically, the purpose ofthis study was to develop new nonexercise V˙ O2max prediction models us…	148	NR	NR	chronic disease or on medications that may affect study variables	NA	NA	Japanese adult women	20-69	1	VO2max (ml/kg/min)		cycle	maximal	NR	NR			step count (SC, steps/day)						x					PA was measured by activity monitors using a uniaxial acceleration sensor (LC) and a triaxial acceleration sensor (AM	BMI, age, step count, VPA	x			x		x
13	79		2010	Cao	Predicting V˙O2max with an Objectively Measured Physical Activity in Japanese Women	cross-sectional	Japan		NA	NR			we hypothesized that the accelerometer-determined PA intensity variables including the time spent in MVPA and VPA are potential predictors of cardiorespiratory fitness in Japanese women. To verify this hypothesis, the relationships between PA intensity variables and V˙ O2max were investigated. More specifically, the purpose ofthis study was to develop new nonexercise V˙ O2max prediction models us…	148	NR	NR	chronic disease or on medications that may affect study variables	NA	NA	Japanese adult women	20-69	1	VO2max (ml/kg/min)		cycle	maximal	NR	NR			VPA (min)						x					PA was measured by activity monitors using a uniaxial acceleration sensor (LC) and a triaxial acceleration sensor (AM	BMI, age, step count	x			x		x
13	80		2010	Cao	Predicting V˙O2max with an Objectively Measured Physical Activity in Japanese Women	cross-sectional	Japan		NA	NR			we hypothesized that the accelerometer-determined PA intensity variables including the time spent in MVPA and VPA are potential predictors of cardiorespiratory fitness in Japanese women. To verify this hypothesis, the relationships between PA intensity variables and V˙ O2max were investigated. More specifically, the purpose ofthis study was to develop new nonexercise V˙ O2max prediction models us…	148	NR	NR	chronic disease or on medications that may affect study variables	NA	NA	Japanese adult women	20-69	1	VO2max (ml/kg/min)		cycle	maximal	NR	NR			WC (cm)				x							Waist circumference (WC) was measured at the umbilical level with an inelastic measuring tape at the end of normal expiration to the nearest 0.1 cm.PA was measured by activity monitors using a uniaxial acceleration sensor (LC) and a triaxial acceleration sensor (AM; Panasonic Electric Work Co., Ltd, Osaka, Japan).	SC, age	x					x
13	81		2010	Cao	Predicting V˙O2max with an Objectively Measured Physical Activity in Japanese Women	cross-sectional	Japan		NA	NR			we hypothesized that the accelerometer-determined PA intensity variables including the time spent in MVPA and VPA are potential predictors of cardiorespiratory fitness in Japanese women. To verify this hypothesis, the relationships between PA intensity variables and V˙ O2max were investigated. More specifically, the purpose ofthis study was to develop new nonexercise V˙ O2max prediction models us…	148	NR	NR	chronic disease or on medications that may affect study variables	NA	NA	Japanese adult women	20-69	1	VO2max (ml/kg/min)		cycle	maximal	NR	NR			age (y)	x										self report	WC,SC				x		x
13	82		2010	Cao	Predicting V˙O2max with an Objectively Measured Physical Activity in Japanese Women	cross-sectional	Japan		NA	NR			we hypothesized that the accelerometer-determined PA intensity variables including the time spent in MVPA and VPA are potential predictors of cardiorespiratory fitness in Japanese women. To verify this hypothesis, the relationships between PA intensity variables and V˙ O2max were investigated. More specifically, the purpose ofthis study was to develop new nonexercise V˙ O2max prediction models us…	148	NR	NR	chronic disease or on medications that may affect study variables	NA	NA	Japanese adult women	20-69	1	VO2max (ml/kg/min)		cycle	maximal	NR	NR			step count (SC, steps/day)						x					PA was measured by activity monitors using a uniaxial acceleration sensor (LC) and a triaxial acceleration sensor (AM	WC, age	x			x
13	83		2010	Cao	Predicting V˙O2max with an Objectively Measured Physical Activity in Japanese Women	cross-sectional	Japan		NA	NR			we hypothesized that the accelerometer-determined PA intensity variables including the time spent in MVPA and VPA are potential predictors of cardiorespiratory fitness in Japanese women. To verify this hypothesis, the relationships between PA intensity variables and V˙ O2max were investigated. More specifically, the purpose ofthis study was to develop new nonexercise V˙ O2max prediction models us…	148	NR	NR	chronic disease or on medications that may affect study variables	NA	NA	Japanese adult women	20-69	1	VO2max (ml/kg/min)		cycle	maximal	NR	NR			WC (cm)				x							Waist circumference (WC) was measured at the umbilical level with an inelastic measuring tape at the end of normal expiration to the nearest 0.1 cm.PA was measured by activity monitors using a uniaxial acceleration sensor (LC) and a triaxial acceleration sensor (AM; Panasonic Electric Work Co., Ltd, Osaka, Japan).	age, step count, MVPA	x					x
13	84		2010	Cao	Predicting V˙O2max with an Objectively Measured Physical Activity in Japanese Women	cross-sectional	Japan		NA	NR			we hypothesized that the accelerometer-determined PA intensity variables including the time spent in MVPA and VPA are potential predictors of cardiorespiratory fitness in Japanese women. To verify this hypothesis, the relationships between PA intensity variables and V˙ O2max were investigated. More specifically, the purpose ofthis study was to develop new nonexercise V˙ O2max prediction models us…	148	NR	NR	chronic disease or on medications that may affect study variables	NA	NA	Japanese adult women	20-69	1	VO2max (ml/kg/min)		cycle	maximal	NR	NR			age (y)	x										self report	WC, step count, MVPA				x		x
13	85		2010	Cao	Predicting V˙O2max with an Objectively Measured Physical Activity in Japanese Women	cross-sectional	Japan		NA	NR			we hypothesized that the accelerometer-determined PA intensity variables including the time spent in MVPA and VPA are potential predictors of cardiorespiratory fitness in Japanese women. To verify this hypothesis, the relationships between PA intensity variables and V˙ O2max were investigated. More specifically, the purpose ofthis study was to develop new nonexercise V˙ O2max prediction models us…	148	NR	NR	chronic disease or on medications that may affect study variables	NA	NA	Japanese adult women	20-69	1	VO2max (ml/kg/min)		cycle	maximal	NR	NR			step count (SC, steps/day)						x					PA was measured by activity monitors using a uniaxial acceleration sensor (LC) and a triaxial acceleration sensor (AM	WC, age, MVPA	x			x		x
13	86		2010	Cao	Predicting V˙O2max with an Objectively Measured Physical Activity in Japanese Women	cross-sectional	Japan		NA	NR			we hypothesized that the accelerometer-determined PA intensity variables including the time spent in MVPA and VPA are potential predictors of cardiorespiratory fitness in Japanese women. To verify this hypothesis, the relationships between PA intensity variables and V˙ O2max were investigated. More specifically, the purpose ofthis study was to develop new nonexercise V˙ O2max prediction models us…	148	NR	NR	chronic disease or on medications that may affect study variables	NA	NA	Japanese adult women	20-69	1	VO2max (ml/kg/min)		cycle	maximal	NR	NR			MVPA (min)						x					PA was measured by activity monitors using a uniaxial acceleration sensor (LC) and a triaxial acceleration sensor (AM	WC, age, step count	x			x		x
13	87		2010	Cao	Predicting V˙O2max with an Objectively Measured Physical Activity in Japanese Women	cross-sectional	Japan		NA	NR			we hypothesized that the accelerometer-determined PA intensity variables including the time spent in MVPA and VPA are potential predictors of cardiorespiratory fitness in Japanese women. To verify this hypothesis, the relationships between PA intensity variables and V˙ O2max were investigated. More specifically, the purpose ofthis study was to develop new nonexercise V˙ O2max prediction models us…	148	NR	NR	chronic disease or on medications that may affect study variables	NA	NA	Japanese adult women	20-69	1	VO2max (ml/kg/min)		cycle	maximal	NR	NR			WC (cm)				x							Waist circumference (WC) was measured at the umbilical level with an inelastic measuring tape at the end of normal expiration to the nearest 0.1 cm.	age, step count, VPA	x					x
13	88		2010	Cao	Predicting V˙O2max with an Objectively Measured Physical Activity in Japanese Women	cross-sectional	Japan		NA	NR			we hypothesized that the accelerometer-determined PA intensity variables including the time spent in MVPA and VPA are potential predictors of cardiorespiratory fitness in Japanese women. To verify this hypothesis, the relationships between PA intensity variables and V˙ O2max were investigated. More specifically, the purpose ofthis study was to develop new nonexercise V˙ O2max prediction models us…	148	NR	NR	chronic disease or on medications that may affect study variables	NA	NA	Japanese adult women	20-69	1	VO2max (ml/kg/min)		cycle	maximal	NR	NR			age (y)	x										self report	WC, age, step count, VPA	x			x		x
13	89		2010	Cao	Predicting V˙O2max with an Objectively Measured Physical Activity in Japanese Women	cross-sectional	Japan		NA	NR			we hypothesized that the accelerometer-determined PA intensity variables including the time spent in MVPA and VPA are potential predictors of cardiorespiratory fitness in Japanese women. To verify this hypothesis, the relationships between PA intensity variables and V˙ O2max were investigated. More specifically, the purpose ofthis study was to develop new nonexercise V˙ O2max prediction models us…	148	NR	NR	chronic disease or on medications that may affect study variables	NA	NA	Japanese adult women	20-69	1	VO2max (ml/kg/min)		cycle	maximal	NR	NR			step count (SC, steps/day)						x					PA was measured by activity monitors using a uniaxial acceleration sensor (LC) and a triaxial acceleration sensor (AM	WC, age, VPA	x			x		x
13	90		2010	Cao	Predicting V˙O2max with an Objectively Measured Physical Activity in Japanese Women	cross-sectional	Japan		NA	NR			we hypothesized that the accelerometer-determined PA intensity variables including the time spent in MVPA and VPA are potential predictors of cardiorespiratory fitness in Japanese women. To verify this hypothesis, the relationships between PA intensity variables and V˙ O2max were investigated. More specifically, the purpose ofthis study was to develop new nonexercise V˙ O2max prediction models us…	148	NR	NR	chronic disease or on medications that may affect study variables	NA	NA	Japanese adult women	20-69	1	VO2max (ml/kg/min)		cycle	maximal	NR	NR			VPA (min)						x					PA was measured by activity monitors using a uniaxial acceleration sensor (LC) and a triaxial acceleration sensor (AM	WC, age, SC	x			x		x
14	91	x	2013	Ceaser	Association of Physical Activity, Fitness, and Race: NHANES 1999–2004	cross-sectional	US	NoA	NHANES	1999-2004	Low	0.9	the purpose of our study was to determine the extent to which PA could explain race/ ethnic differences in CRF among young adults in the United States.	3115	stratified multistage probability design that includes an oversampling of minority groups	adults >=20 years old who complete both household survey and examination	National Health and Nutrition Examination Survey. Cardiovascular Fitness Testing Procedures Manual, ed. Centers for Disease Control and Prevention. Hyattsville (MD): National Center for Health Statistics;2004.	NR	NA	non-institutionalized adult US population	20-49	0.469	VO2max (ml/kg/min)	.	treadmill	submaximal	Only noninstitutionalized civilians age 20–49 yr were eligible for the submaximal exercise testing.	Existing medical conditions diagnosed cardiovascular disease, and abnormal hemodynamics (i.e., systolic blood pressure >180 mm Hg diastolic blood pressure >100 mm Hg or resting heart rate >100 bpm)	A submaximal treadmill exercise test	.	MET level (MET min/wk)						x					self-report the previous 30 d of PA from three domains: leisure time, transportational, and domestic. Intensity, frequency, and duration were used to calculate a MET-minutes per week score from all three PA domains (7,12). METs are standardized units (1 MET = 3.5 mLIkg j1Imin j1) used to estimate the cost of an activity. Participants were grouped into one of six categories, with group 1 being ina…	age, sex, WC risk ,education, living with partner, smoking, race, VMET	x	x	x	x	x	x
14	92		2013	Ceaser	Association of Physical Activity, Fitness, and Race: NHANES 1999–2004	cross-sectional	US		NHANES	1999-2004			the purpose of our study was to determine the extent to which PA could explain race/ ethnic differences in CRF among young adults in the United States.	3115	stratified multistage probability design that includes an oversampling of minority groups	adults >=20 years old who complete both household survey and examination	National Health and Nutrition Examination Survey. Cardiovascular Fitness Testing Procedures Manual, ed. Centers for Disease Control and Prevention. Hyattsville (MD): National Center for Health Statistics;2004.	NR	NA	non-institutionalized adult US population	20-49	0.469	VO2max (ml/kg/min)		treadmill	submaximal	Only noninstitutionalized civilians age 20–49 yr were eligible for the submaximal exercise testing.	Existing medical conditions diagnosed cardiovascular disease, and abnormal hemodynamics (i.e., systolic blood pressure >180 mm Hg diastolic blood pressure >100 mm Hg or resting heart rate >100 bpm)			age (y)	x										self report	sex, WC risk ,education, living with partner, smoking, race, MET level, VMET		x	x	x	x	x
14	93		2013	Ceaser	Association of Physical Activity, Fitness, and Race: NHANES 1999–2004	cross-sectional	US		NHANES	1999-2004			the purpose of our study was to determine the extent to which PA could explain race/ ethnic differences in CRF among young adults in the United States.	3115	stratified multistage probability design that includes an oversampling of minority groups	adults >=20 years old who complete both household survey and examination	National Health and Nutrition Examination Survey. Cardiovascular Fitness Testing Procedures Manual, ed. Centers for Disease Control and Prevention. Hyattsville (MD): National Center for Health Statistics;2004.	NR	NA	non-institutionalized adult US population	20-49	0.469	VO2max (ml/kg/min)		treadmill	submaximal	Only noninstitutionalized civilians age 20–49 yr were eligible for the submaximal exercise testing.	Existing medical conditions diagnosed cardiovascular disease, and abnormal hemodynamics (i.e., systolic blood pressure >180 mm Hg diastolic blood pressure >100 mm Hg or resting heart rate >100 bpm)			sex		x									self report	age,WC risk ,education, living with partner, smoking, race, MET level, VMET	x		x	x	x	x
14	94		2013	Ceaser	Association of Physical Activity, Fitness, and Race: NHANES 1999–2004	cross-sectional	US		NHANES	1999-2004			the purpose of our study was to determine the extent to which PA could explain race/ ethnic differences in CRF among young adults in the United States.	3115	stratified multistage probability design that includes an oversampling of minority groups	adults >=20 years old who complete both household survey and examination	National Health and Nutrition Examination Survey. Cardiovascular Fitness Testing Procedures Manual, ed. Centers for Disease Control and Prevention. Hyattsville (MD): National Center for Health Statistics;2004.	NR	NA	non-institutionalized adult US population	20-49	0.469	VO2max (ml/kg/min)		treadmill	submaximal	Only noninstitutionalized civilians age 20–49 yr were eligible for the submaximal exercise testing.	Existing medical conditions diagnosed cardiovascular disease, and abnormal hemodynamics (i.e., systolic blood pressure >180 mm Hg diastolic blood pressure >100 mm Hg or resting heart rate >100 bpm)			WC (risk)				x							Waist circumference (WC) was assessed using standardized methods (6). For differences in WC, individuals were grouped into two categories (yes risk or no risk). Women were considered ‘‘yes risk’’ for cardiovascular disease if their WC was 988 cm. Men were considered ‘‘yes risk’’ for cardiovascular disease if their WC was 9102 cm. Women with a WC e88 cm were considered ‘‘no risk,’’ and men e102 cm…	age, sex, education, living with partner, smoking, race, MET level, VMET	x	x	x		x	x
14	95		2013	Ceaser	Association of Physical Activity, Fitness, and Race: NHANES 1999–2004	cross-sectional	US		NHANES	1999-2004			the purpose of our study was to determine the extent to which PA could explain race/ ethnic differences in CRF among young adults in the United States.	3115	stratified multistage probability design that includes an oversampling of minority groups	adults >=20 years old who complete both household survey and examination	National Health and Nutrition Examination Survey. Cardiovascular Fitness Testing Procedures Manual, ed. Centers for Disease Control and Prevention. Hyattsville (MD): National Center for Health Statistics;2004.	NR	NA	non-institutionalized adult US population	20-49	0.469	VO2max (ml/kg/min)		treadmill	submaximal	Only noninstitutionalized civilians age 20–49 yr were eligible for the submaximal exercise testing.	Existing medical conditions diagnosed cardiovascular disease, and abnormal hemodynamics (i.e., systolic blood pressure >180 mm Hg diastolic blood pressure >100 mm Hg or resting heart rate >100 bpm)			smoking (status:current, former, non)							x				self report	age, sex, WC risk ,education, living with partner, race, MET level, VMET	x	x	x	x	x	x
14	96		2013	Ceaser	Association of Physical Activity, Fitness, and Race: NHANES 1999–2004	cross-sectional	US		NHANES	1999-2004			the purpose of our study was to determine the extent to which PA could explain race/ ethnic differences in CRF among young adults in the United States.	3115	stratified multistage probability design that includes an oversampling of minority groups	adults >=20 years old who complete both household survey and examination	National Health and Nutrition Examination Survey. Cardiovascular Fitness Testing Procedures Manual, ed. Centers for Disease Control and Prevention. Hyattsville (MD): National Center for Health Statistics;2004.	NR	NA	non-institutionalized adult US population	20-49	0.469	VO2max (ml/kg/min)		treadmill	submaximal	Only noninstitutionalized civilians age 20–49 yr were eligible for the submaximal exercise testing.	Existing medical conditions diagnosed cardiovascular disease, and abnormal hemodynamics (i.e., systolic blood pressure >180 mm Hg diastolic blood pressure >100 mm Hg or resting heart rate >100 bpm)			race (Non-Hispanic White Non-Hispanic Blacks Mexican Americans Other)			x								self report	age, sex, WC risk ,education, living with partner, smoking, MET level, VMET	x	x		x	x	x
14	97		2013	Ceaser	Association of Physical Activity, Fitness, and Race: NHANES 1999–2004	cross-sectional	US		NHANES	1999-2004			the purpose of our study was to determine the extent to which PA could explain race/ ethnic differences in CRF among young adults in the United States.	3115	stratified multistage probability design that includes an oversampling of minority groups	adults >=20 years old who complete both household survey and examination	National Health and Nutrition Examination Survey. Cardiovascular Fitness Testing Procedures Manual, ed. Centers for Disease Control and Prevention. Hyattsville (MD): National Center for Health Statistics;2004.	NR	NA	non-institutionalized adult US population	20-49	0.469	VO2max (ml/kg/min)		treadmill	submaximal	Only noninstitutionalized civilians age 20–49 yr were eligible for the submaximal exercise testing.	Existing medical conditions diagnosed cardiovascular disease, and abnormal hemodynamics (i.e., systolic blood pressure >180 mm Hg diastolic blood pressure >100 mm Hg or resting heart rate >100 bpm)			race (Non-Hispanic White Non-Hispanic Blacks Mexican Americans Other)			x								self report	age, sex, WC risk ,education, living with partner, smoking, MET level, VMET	x	x		x	x	x
14	98		2013	Ceaser	Association of Physical Activity, Fitness, and Race: NHANES 1999–2004	cross-sectional	US		NHANES	1999-2004			the purpose of our study was to determine the extent to which PA could explain race/ ethnic differences in CRF among young adults in the United States.	3115	stratified multistage probability design that includes an oversampling of minority groups	adults >=20 years old who complete both household survey and examination	National Health and Nutrition Examination Survey. Cardiovascular Fitness Testing Procedures Manual, ed. Centers for Disease Control and Prevention. Hyattsville (MD): National Center for Health Statistics;2004.	NR	NA	non-institutionalized adult US population	20-49	0.469	VO2max (ml/kg/min)		treadmill	submaximal	Only noninstitutionalized civilians age 20–49 yr were eligible for the submaximal exercise testing.	Existing medical conditions diagnosed cardiovascular disease, and abnormal hemodynamics (i.e., systolic blood pressure >180 mm Hg diastolic blood pressure >100 mm Hg or resting heart rate >100 bpm)			race (Non-Hispanic White Non-Hispanic Blacks Mexican Americans Other)			x								self report	age, sex, WC risk ,education, living with partner, smoking, MET level, VMET	x	x		x	x	x
14	99		2013	Ceaser	Association of Physical Activity, Fitness, and Race: NHANES 1999–2004	cross-sectional	US		NHANES	1999-2004			the purpose of our study was to determine the extent to which PA could explain race/ ethnic differences in CRF among young adults in the United States.	3115	stratified multistage probability design that includes an oversampling of minority groups	adults >=20 years old who complete both household survey and examination	National Health and Nutrition Examination Survey. Cardiovascular Fitness Testing Procedures Manual, ed. Centers for Disease Control and Prevention. Hyattsville (MD): National Center for Health Statistics;2004.	NR	NA	non-institutionalized adult US population	20-49	0.469	VO2max (ml/kg/min)		treadmill	submaximal	Only noninstitutionalized civilians age 20–49 yr were eligible for the submaximal exercise testing.	Existing medical conditions diagnosed cardiovascular disease, and abnormal hemodynamics (i.e., systolic blood pressure >180 mm Hg diastolic blood pressure >100 mm Hg or resting heart rate >100 bpm)			VMET (percentage of minutes performed at a vigorous intensity)						x					self-report the previous 30 d of PA from three domains: leisure time, transportational, and domestic. Intensity, frequency, and duration were used to calculate a MET-minutes per week score from all three PA domains (7,12). METs are standardized units (1 MET = 3.5 mLIkg j1Imin j1) used to estimate the cost of an activity. Participants were grouped into one of six categories, with group 1 being ina…	age, sex, WC risk ,education, living with partner, smoking, race, MET level	x	x	x	x	x	x
14	100		2013	Ceaser	Association of Physical Activity, Fitness, and Race: NHANES 1999–2004	cross-sectional	US		NHANES	1999-2004			the purpose of our study was to determine the extent to which PA could explain race/ ethnic differences in CRF among young adults in the United States.	3115	stratified multistage probability design that includes an oversampling of minority groups	adults >=20 years old who complete both household survey and examination	National Health and Nutrition Examination Survey. Cardiovascular Fitness Testing Procedures Manual, ed. Centers for Disease Control and Prevention. Hyattsville (MD): National Center for Health Statistics;2004.	NR	NA	non-institutionalized adult US population	20-49	0.469	VO2max (ml/kg/min)		treadmill	submaximal	Only noninstitutionalized civilians age 20–49 yr were eligible for the submaximal exercise testing.	Existing medical conditions diagnosed cardiovascular disease, and abnormal hemodynamics (i.e., systolic blood pressure >180 mm Hg diastolic blood pressure >100 mm Hg or resting heart rate >100 bpm)			Met level (MET min/wk) by race			x			x					self-report the previous 30 d of PA from three domains: leisure time, transportational, and domestic. Intensity, frequency, and duration were used to calculate a MET-minutes per week score from all three PA domains (7,12). METs are standardized units (1 MET = 3.5 mLIkg j1Imin j1) used to estimate the cost of an activity. Participants were grouped into one of six categories, with group 1 being ina…	age, sex, WC risk ,education, living with partner, smoking, race, VMET	x	x	x	x	x	x
14	101		2013	Ceaser	Association of Physical Activity, Fitness, and Race: NHANES 1999–2004	cross-sectional	US		NHANES	1999-2004			the purpose of our study was to determine the extent to which PA could explain race/ ethnic differences in CRF among young adults in the United States.	3115	stratified multistage probability design that includes an oversampling of minority groups	adults >=20 years old who complete both household survey and examination	National Health and Nutrition Examination Survey. Cardiovascular Fitness Testing Procedures Manual, ed. Centers for Disease Control and Prevention. Hyattsville (MD): National Center for Health Statistics;2004.	NR	NA	non-institutionalized adult US population	20-49	0.469	VO2max (ml/kg/min)		treadmill	submaximal	Only noninstitutionalized civilians age 20–49 yr were eligible for the submaximal exercise testing.	Existing medical conditions diagnosed cardiovascular disease, and abnormal hemodynamics (i.e., systolic blood pressure >180 mm Hg diastolic blood pressure >100 mm Hg or resting heart rate >100 bpm)			age (y) by race	x		x								self report	sex, WC risk ,education, living with partner, smoking, race, MET level, VMET		x	x	x	x	x
14	102		2013	Ceaser	Association of Physical Activity, Fitness, and Race: NHANES 1999–2004	cross-sectional	US		NHANES	1999-2004			the purpose of our study was to determine the extent to which PA could explain race/ ethnic differences in CRF among young adults in the United States.	3115	stratified multistage probability design that includes an oversampling of minority groups	adults >=20 years old who complete both household survey and examination	National Health and Nutrition Examination Survey. Cardiovascular Fitness Testing Procedures Manual, ed. Centers for Disease Control and Prevention. Hyattsville (MD): National Center for Health Statistics;2004.	NR	NA	non-institutionalized adult US population	20-49	0.469	VO2max (ml/kg/min)		treadmill	submaximal	Only noninstitutionalized civilians age 20–49 yr were eligible for the submaximal exercise testing.	Existing medical conditions diagnosed cardiovascular disease, and abnormal hemodynamics (i.e., systolic blood pressure >180 mm Hg diastolic blood pressure >100 mm Hg or resting heart rate >100 bpm)			sex by race		x	x								self report	age, WC risk ,education, living with partner, smoking, race, MET level, VMET	x		x	x	x	x
14	103		2013	Ceaser	Association of Physical Activity, Fitness, and Race: NHANES 1999–2004	cross-sectional	US		NHANES	1999-2004			the purpose of our study was to determine the extent to which PA could explain race/ ethnic differences in CRF among young adults in the United States.	3115	stratified multistage probability design that includes an oversampling of minority groups	adults >=20 years old who complete both household survey and examination	National Health and Nutrition Examination Survey. Cardiovascular Fitness Testing Procedures Manual, ed. Centers for Disease Control and Prevention. Hyattsville (MD): National Center for Health Statistics;2004.	NR	NA	non-institutionalized adult US population	20-49	0.469	VO2max (ml/kg/min)		treadmill	submaximal	Only noninstitutionalized civilians age 20–49 yr were eligible for the submaximal exercise testing.	Existing medical conditions diagnosed cardiovascular disease, and abnormal hemodynamics (i.e., systolic blood pressure >180 mm Hg diastolic blood pressure >100 mm Hg or resting heart rate >100 bpm)			WC (risk) by race			x	x							Waist circumference (WC) was assessed using standardized methods (6). For differences in WC, individuals were grouped into two categories (yes risk or no risk). Women were considered ‘‘yes risk’’ for cardiovascular disease if their WC was 988 cm. Men were considered ‘‘yes risk’’ for cardiovascular disease if their WC was 9102 cm. Women with a WC e88 cm were considered ‘‘no risk,’’ and men e102 cm…	age, sex, education, living with partner, smoking, race, MET level, VMET	x	x	x		x	x
14	104		2013	Ceaser	Association of Physical Activity, Fitness, and Race: NHANES 1999–2004	cross-sectional	US		NHANES	1999-2004			the purpose of our study was to determine the extent to which PA could explain race/ ethnic differences in CRF among young adults in the United States.	3115	stratified multistage probability design that includes an oversampling of minority groups	adults >=20 years old who complete both household survey and examination	National Health and Nutrition Examination Survey. Cardiovascular Fitness Testing Procedures Manual, ed. Centers for Disease Control and Prevention. Hyattsville (MD): National Center for Health Statistics;2004.	NR	NA	non-institutionalized adult US population	20-49	0.469	VO2max (ml/kg/min)		treadmill	submaximal	Only noninstitutionalized civilians age 20–49 yr were eligible for the submaximal exercise testing.	Existing medical conditions diagnosed cardiovascular disease, and abnormal hemodynamics (i.e., systolic blood pressure >180 mm Hg diastolic blood pressure >100 mm Hg or resting heart rate >100 bpm)			smoking by race			x				x				self report	age, sex, WC risk ,education, living with partner, race, MET level, VMET	x	x	x	x	x	x
14	105		2013	Ceaser	Association of Physical Activity, Fitness, and Race: NHANES 1999–2004	cross-sectional	US		NHANES	1999-2004			the purpose of our study was to determine the extent to which PA could explain race/ ethnic differences in CRF among young adults in the United States.	3115	stratified multistage probability design that includes an oversampling of minority groups	adults >=20 years old who complete both household survey and examination	National Health and Nutrition Examination Survey. Cardiovascular Fitness Testing Procedures Manual, ed. Centers for Disease Control and Prevention. Hyattsville (MD): National Center for Health Statistics;2004.	NR	NA	non-institutionalized adult US population	20-49	0.469	VO2max (ml/kg/min)		treadmill	submaximal	Only noninstitutionalized civilians age 20–49 yr were eligible for the submaximal exercise testing.	Existing medical conditions diagnosed cardiovascular disease, and abnormal hemodynamics (i.e., systolic blood pressure >180 mm Hg diastolic blood pressure >100 mm Hg or resting heart rate >100 bpm)			VMET by race			x			x					self-report the previous 30 d of PA from three domains: leisure time, transportational, and domestic. Intensity, frequency, and duration were used to calculate a MET-minutes per week score from all three PA domains (7,12). METs are standardized units (1 MET = 3.5 mLIkg j1Imin j1) used to estimate the cost of an activity. Participants were grouped into one of six categories, with group 1 being ina…	age, sex, WC risk ,education, living with partner, smoking, race, MET level	x	x	x	x	x	x
15	106	x	2009	Cleland	Socioeconomic Position and the Tracking of Physical Activity and Cardiorespiratory Fitness From Childhood to Adulthood	longitudinal	Australia	OC	ASHFS	1985-2004/2006	Low	0.755556	examine the relation of SEP and social mobility with tracking of physical activity and cardiorespiratory fitness from childhood into adulthood.	645	two stage probability sampling at baseline, at follow-up participants were traced from current and historical electoral rolls, electronic telephone directories, and contact with classmates as part of the CDAH study. Participants were sent invitation letters and were followed up via telephone if a contact number was available.	NR	NR	NR	0.76	males and females across childhood and adulthood	9-15 (baseline) and 26-36 (follow-up)	0.48	PWC170	.	cycle	submaximal	NR	NR		.	Parental Education Categories (high, medium, low)					x						For each parent separately, participants reported the highest level of education completed by their father/mother (or other male/female who lived with them and was like a father/mother to them) for most of the time until they were 12 years of age, similar to measures used in several other epidemiologic studies (33– 37). Three variables were used for this analysis: highest level of maternal educat…	age, own educaction	x				x
15	107		2009	Cleland	Socioeconomic Position and the Tracking of Physical Activity and Cardiorespiratory Fitness From Childhood to Adulthood	longitudinal	Australia		ASHFS	1985-2004/2006			examine the relation of SEP and social mobility with tracking of physical activity and cardiorespiratory fitness from childhood into adulthood.	645	two stage probability sampling at baseline, at follow-up participants were traced from current and historical electoral rolls, electronic telephone directories, and contact with classmates as part of the CDAH study. Participants were sent invitation letters and were followed up via telephone if a contact number was available.	NR	NR	NR	0.76	males and females across childhood and adulthood	9-15 (baseline) and 26-36 (follow-up)	0.48	PWC170		cycle	submaximal	NR	NR			Parental Education Categories (high, medium, low)					x						For each parent separately, participants reported the highest level of education completed by their father/mother (or other male/female who lived with them and was like a father/mother to them) for most of the time until they were 12 years of age, similar to measures used in several other epidemiologic studies (33– 37). Three variables were used for this analysis: highest level of maternal educat…	age, own educaction	x				x
15	108		2009	Cleland	Socioeconomic Position and the Tracking of Physical Activity and Cardiorespiratory Fitness From Childhood to Adulthood	longitudinal	Australia		ASHFS	1985-2004/2006			examine the relation of SEP and social mobility with tracking of physical activity and cardiorespiratory fitness from childhood into adulthood.	645	two stage probability sampling at baseline, at follow-up participants were traced from current and historical electoral rolls, electronic telephone directories, and contact with classmates as part of the CDAH study. Participants were sent invitation letters and were followed up via telephone if a contact number was available.	NR	NR	NR	0.76	males and females across childhood and adulthood	9-15 (baseline) and 26-36 (follow-up)	0.48	PWC170		cycle	submaximal	NR	NR			Parental Education Categories (high, medium, low)					x						For each parent separately, participants reported the highest level of education completed by their father/mother (or other male/female who lived with them and was like a father/mother to them) for most of the time until they were 12 years of age, similar to measures used in several other epidemiologic studies (33– 37). Three variables were used for this analysis: highest level of maternal educat…	age, own educaction	x				x
15	109		2009	Cleland	Socioeconomic Position and the Tracking of Physical Activity and Cardiorespiratory Fitness From Childhood to Adulthood	longitudinal	Australia		ASHFS	1985-2004/2006			examine the relation of SEP and social mobility with tracking of physical activity and cardiorespiratory fitness from childhood into adulthood.	645	two stage probability sampling at baseline, at follow-up participants were traced from current and historical electoral rolls, electronic telephone directories, and contact with classmates as part of the CDAH study. Participants were sent invitation letters and were followed up via telephone if a contact number was available.	NR	NR	NR	0.76	males and females across childhood and adulthood	9-15 (baseline) and 26-36 (follow-up)	0.48	PWC170		cycle	submaximal	NR	NR			Social Mobility Categories					x						Highest level of parental education at baseline and highest level of own education at follow-up were used to classify social mobility as persistently low (low SEP at baseline and follow-up), persistently medium (medium SEP at baseline and follow-up), persistently high (high SEP at baseline and follow-up), upwardly mobile (moving from low SEP at baseline to medium or high SEP at follow-up or from …	age, sex	x	x
15	110		2009	Cleland	Socioeconomic Position and the Tracking of Physical Activity and Cardiorespiratory Fitness From Childhood to Adulthood	longitudinal	Australia		ASHFS	1985-2004/2006			examine the relation of SEP and social mobility with tracking of physical activity and cardiorespiratory fitness from childhood into adulthood.	645	two stage probability sampling at baseline, at follow-up participants were traced from current and historical electoral rolls, electronic telephone directories, and contact with classmates as part of the CDAH study. Participants were sent invitation letters and were followed up via telephone if a contact number was available.	NR	NR	NR	0.76	males and females across childhood and adulthood	9-15 (baseline) and 26-36 (follow-up)	0.48	PWC170		cycle	submaximal	NR	NR			Social Mobility Categories					x						Highest level of parental education at baseline and highest level of own education at follow-up were used to classify social mobility as persistently low (low SEP at baseline and follow-up), persistently medium (medium SEP at baseline and follow-up), persistently high (high SEP at baseline and follow-up), upwardly mobile (moving from low SEP at baseline to medium or high SEP at follow-up or from …	age, sex	x	x
15	111		2009	Cleland	Socioeconomic Position and the Tracking of Physical Activity and Cardiorespiratory Fitness From Childhood to Adulthood	longitudinal	Australia		ASHFS	1985-2004/2006			examine the relation of SEP and social mobility with tracking of physical activity and cardiorespiratory fitness from childhood into adulthood.	645	two stage probability sampling at baseline, at follow-up participants were traced from current and historical electoral rolls, electronic telephone directories, and contact with classmates as part of the CDAH study. Participants were sent invitation letters and were followed up via telephone if a contact number was available.	NR	NR	NR	0.76	males and females across childhood and adulthood	9-15 (baseline) and 26-36 (follow-up)	0.48	PWC170		cycle	submaximal	NR	NR			Social Mobility Categories					x						Highest level of parental education at baseline and highest level of own education at follow-up were used to classify social mobility as persistently low (low SEP at baseline and follow-up), persistently medium (medium SEP at baseline and follow-up), persistently high (high SEP at baseline and follow-up), upwardly mobile (moving from low SEP at baseline to medium or high SEP at follow-up or from …	age, sex	x	x
16	112	x	2013	Dagan	Waist circumference vs body mass index in association with cardiorespiratory fitness in healthy men and women: a cross sectional analysis of 403 subjects	cross-sectional	Israel	AS	NA	2010	Low	0.695122	The purpose of the current study was to compare, in both men and women, associations of BMI and waist circumference, with cardiorespiratory fitness, as assessed by calculated VO2max, and to explore sex differences in these associations.	403	convenience sample	healthy subjects examined in the Periodic Examination Health Survey at the Sheba Medical Center in 2010.	Subjects with chronic conditions that could interfere with physical activity: cardiovascular diseases, diabetes, stroke, malignancies, asthma, COPD, rheumatic diseases, or orthopedic problems, were excluded, as well as those on beta-blockers and other agents that would slow the heart rate and interfere with the fitness test.	0.943	NA	healthy subjects examined in the Periodic Examination Health Survey at the Sheba Medical Center in 2010.	25-65	0.45	VO2max (ml/kg/min)	.	treadmill	maximal	NR	Subjects with chronic conditions that could interfere with physical activity: cardiovascular diseases, diabetes, stroke, malignancies, asthma, COPD, rheumatic diseases, or orthopedic problems, were excluded, as well as those on beta-blockers and other agents that would slow the heart rate and interfere with the fitness test.	maximal fitness test Bruce protocol	.	WC (cm)				x							WC was measured three times at the level of the umbilicus.	age, hours of training weekly, caloric expenditure in sports activity weekly, sex, smoking,BMI	x	x		x		x
16	113		2013	Dagan	Waist circumference vs body mass index in association with cardiorespiratory fitness in healthy men and women: a cross sectional analysis of 403 subjects	cross-sectional	Israel		NA	2010			The purpose of the current study was to compare, in both men and women, associations of BMI and waist circumference, with cardiorespiratory fitness, as assessed by calculated VO2max, and to explore sex differences in these associations.	403	convenience sample	healthy subjects examined in the Periodic Examination Health Survey at the Sheba Medical Center in 2010.	Subjects with chronic conditions that could interfere with physical activity: cardiovascular diseases, diabetes, stroke, malignancies, asthma, COPD, rheumatic diseases, or orthopedic problems, were excluded, as well as those on beta-blockers and other agents that would slow the heart rate and interfere with the fitness test.	0.943	NA	healthy subjects examined in the Periodic Examination Health Survey at the Sheba Medical Center in 2010.	25-65	0.45	VO2max (ml/kg/min)		treadmill	maximal	NR	Subjects with chronic conditions that could interfere with physical activity: cardiovascular diseases, diabetes, stroke, malignancies, asthma, COPD, rheumatic diseases, or orthopedic problems, were excluded, as well as those on beta-blockers and other agents that would slow the heart rate and interfere with the fitness test.			age (y)	x										Subjects filled in the Periodic Examination Health Survey questionnaire, comprising information on: age, sex, smoking habits (by current smokers and non smokers), and routine sports related physical activity habits (number, duration, and type of physical activity training per week), and nutritional information (adherence to a certain diet, body weight changes over the previous year, and receiving…	WC, hours of training weekly, caloric expenditure in sports activity weekly, sex, smoking, BMI		x		x		x
16	114		2013	Dagan	Waist circumference vs body mass index in association with cardiorespiratory fitness in healthy men and women: a cross sectional analysis of 403 subjects	cross-sectional	Israel		NA	2010			The purpose of the current study was to compare, in both men and women, associations of BMI and waist circumference, with cardiorespiratory fitness, as assessed by calculated VO2max, and to explore sex differences in these associations.	403	convenience sample	healthy subjects examined in the Periodic Examination Health Survey at the Sheba Medical Center in 2010.	Subjects with chronic conditions that could interfere with physical activity: cardiovascular diseases, diabetes, stroke, malignancies, asthma, COPD, rheumatic diseases, or orthopedic problems, were excluded, as well as those on beta-blockers and other agents that would slow the heart rate and interfere with the fitness test.	0.943	NA	healthy subjects examined in the Periodic Examination Health Survey at the Sheba Medical Center in 2010.	25-65	0.45	VO2max (ml/kg/min)		treadmill	maximal	NR	Subjects with chronic conditions that could interfere with physical activity: cardiovascular diseases, diabetes, stroke, malignancies, asthma, COPD, rheumatic diseases, or orthopedic problems, were excluded, as well as those on beta-blockers and other agents that would slow the heart rate and interfere with the fitness test.			hours of training weekly						x					routine sports related physical activity habits (number, duration, and type of physical activity training per week), and nutritional information (adherence to a certain diet, body weight changes over the previous year, and receiving of nutritional consulting).	WC, age, caloric expenditure in sports activity weekly, sex, smoking, BMI	x	x		x		x
16	115		2013	Dagan	Waist circumference vs body mass index in association with cardiorespiratory fitness in healthy men and women: a cross sectional analysis of 403 subjects	cross-sectional	Israel		NA	2010			The purpose of the current study was to compare, in both men and women, associations of BMI and waist circumference, with cardiorespiratory fitness, as assessed by calculated VO2max, and to explore sex differences in these associations.	403	convenience sample	healthy subjects examined in the Periodic Examination Health Survey at the Sheba Medical Center in 2010.	Subjects with chronic conditions that could interfere with physical activity: cardiovascular diseases, diabetes, stroke, malignancies, asthma, COPD, rheumatic diseases, or orthopedic problems, were excluded, as well as those on beta-blockers and other agents that would slow the heart rate and interfere with the fitness test.	0.943	NA	healthy subjects examined in the Periodic Examination Health Survey at the Sheba Medical Center in 2010.	25-65	0.45	VO2max (ml/kg/min)		treadmill	maximal	NR	Subjects with chronic conditions that could interfere with physical activity: cardiovascular diseases, diabetes, stroke, malignancies, asthma, COPD, rheumatic diseases, or orthopedic problems, were excluded, as well as those on beta-blockers and other agents that would slow the heart rate and interfere with the fitness test.			caloric expenditure in sports activity weekly (kcal)						x					Weekly caloric expenditure for physical activity was calculated as the product of: the number of training sessions per week, duration of exercise, exercise intensity according to type of physical activity [12], and body weight.	WC, age, hours of training weekly, sex, smoking, BMI	x	x		x		x
16	116		2013	Dagan	Waist circumference vs body mass index in association with cardiorespiratory fitness in healthy men and women: a cross sectional analysis of 403 subjects	cross-sectional	Israel		NA	2010			The purpose of the current study was to compare, in both men and women, associations of BMI and waist circumference, with cardiorespiratory fitness, as assessed by calculated VO2max, and to explore sex differences in these associations.	403	convenience sample	healthy subjects examined in the Periodic Examination Health Survey at the Sheba Medical Center in 2010.	Subjects with chronic conditions that could interfere with physical activity: cardiovascular diseases, diabetes, stroke, malignancies, asthma, COPD, rheumatic diseases, or orthopedic problems, were excluded, as well as those on beta-blockers and other agents that would slow the heart rate and interfere with the fitness test.	0.943	NA	healthy subjects examined in the Periodic Examination Health Survey at the Sheba Medical Center in 2010.	25-65	0.45	VO2max (ml/kg/min)		treadmill	maximal	NR	Subjects with chronic conditions that could interfere with physical activity: cardiovascular diseases, diabetes, stroke, malignancies, asthma, COPD, rheumatic diseases, or orthopedic problems, were excluded, as well as those on beta-blockers and other agents that would slow the heart rate and interfere with the fitness test.			smoking (%)							x				Subjects filled in the Periodic Examination Health Survey questionnaire, comprising information on: age, sex, smoking habits (by current smokers and non smokers), and routine sports related physical activity habits (number, duration, and type of physical activity training per week), and nutritional information (adherence to a certain diet, body weight changes over the previous year, and receiving…	WC, age, hours of training weekly, caloric expenditure in sports activity weekly, sex, BMI	x	x		x		x
16	117		2013	Dagan	Waist circumference vs body mass index in association with cardiorespiratory fitness in healthy men and women: a cross sectional analysis of 403 subjects	cross-sectional	Israel		NA	2010			The purpose of the current study was to compare, in both men and women, associations of BMI and waist circumference, with cardiorespiratory fitness, as assessed by calculated VO2max, and to explore sex differences in these associations.	403	convenience sample	healthy subjects examined in the Periodic Examination Health Survey at the Sheba Medical Center in 2010.	Subjects with chronic conditions that could interfere with physical activity: cardiovascular diseases, diabetes, stroke, malignancies, asthma, COPD, rheumatic diseases, or orthopedic problems, were excluded, as well as those on beta-blockers and other agents that would slow the heart rate and interfere with the fitness test.	0.943	NA	healthy subjects examined in the Periodic Examination Health Survey at the Sheba Medical Center in 2010.	25-65	0.45	VO2max (ml/kg/min)		treadmill	maximal	NR	Subjects with chronic conditions that could interfere with physical activity: cardiovascular diseases, diabetes, stroke, malignancies, asthma, COPD, rheumatic diseases, or orthopedic problems, were excluded, as well as those on beta-blockers and other agents that would slow the heart rate and interfere with the fitness test.			BMI (kg/m2)				x							BMI (self-reported for height)	age, hours of weekly training, caloric expenditure in sports activity weekly, sex, smoking	x	x		x		x
17	118	x	1972	Dehn	longitudinal variations in maximal oxygen intake with age and activity	longitudinal	US	NoA	NA	NR	Medium	0.465116	evaluate the comparability of longitudgeinal changes to cross sectional variations in Vo2max with age and their relationship to differences in habitual physical-activity status	40	participants in a long term study involving five examinations and maximal exercise tests over the preceding 8 years. Selection of participants was based on a preliminary survey of the adult membership rolls of the Downtown Seattle YMCA. A total of 1,069 men, aged 35 years or older, were included in the “physical membership,” which entitled each individual to use the exercise facilities (pool, gym…	YMCA attendance requirements: Arbitrarily, the “active” men were defined as attending an average of at least twice a week (100 times/yr.). The “inactive” men were defined as attending the YMCA a maximum of five times in the entire preceding year.	NR	NR	NR	healthy men	40-72	0	VO2max (ml/kg/min)	.	treadmill	maximal	NR	NR	maximal fitness test Bruce protocol breath analyses	x	age	x										self report	changes in body weight				x
18	119	x	2016	Dyrstad	Cardiorespiratory fitness in groups with different physical activity levels	cross-sectional	Norway	EU	NR	NR	Low	0.709302	examine how difference levels of self reported and objectively measured PA, including sedentary time reflect variation in Vo2max	729	multi center study including 9 regional test centers throughout Norway. Representative sample from cachment areas were drawn from population registries	The only inclusion criterion was that the participants had to be between ages 20 and 85 yr. T	86 did not wear the accelerometer, 14 had defective monitors, and 118 participants were excluded for providing less than 4 d of valid accelerometer data,	0.0034	NA	Norweigan men and women aged 20-84	20-84	0.48	VO2max (ml/kg/min)	.	treadmill	maximal	NA	Participants with either two or more cardiovascular risk factors combined with an age of . 50 years or with a BP . 180/110 mm Hg were excluded (n 5 18).		x	sex		x									self report	age, BMI, VPA, MVPA	x			x		x
18	120		2016	Dyrstad	Cardiorespiratory fitness in groups with different physical activity levels	cross-sectional	Norway		NR	NR			examine how difference levels of self reported and objectively measured PA, including sedentary time reflect variation in Vo2max	729	multi center study including 9 regional test centers throughout Norway. Representative sample from cachment areas were drawn from population registries	The only inclusion criterion was that the participants had to be between ages 20 and 85 yr. T	86 did not wear the accelerometer, 14 had defective monitors, and 118 participants were excluded for providing less than 4 d of valid accelerometer data,	0.94	NA	Norweigan men and women aged 20-84	20-84	0.48	VO2max (ml/kg/min)		treadmill	maximal	NA	Participants with either two or more cardiovascular risk factors combined with an age of . 50 years or with a BP . 180/110 mm Hg were excluded (n 5 18).			age (y)	x										self report	sex, BMI, VPA, MVPA, (accelerometer wear time)		x		x		x
18	121		2016	Dyrstad	Cardiorespiratory fitness in groups with different physical activity levels	cross-sectional	Norway		NR	NR			examine how difference levels of self reported and objectively measured PA, including sedentary time reflect variation in Vo2max	729	multi center study including 9 regional test centers throughout Norway. Representative sample from cachment areas were drawn from population registries	The only inclusion criterion was that the participants had to be between ages 20 and 85 yr. T	86 did not wear the accelerometer, 14 had defective monitors, and 118 participants were excluded for providing less than 4 d of valid accelerometer data,	0.94	NA	Norweigan men and women aged 20-84	20-84	0.48	VO2max (ml/kg/min)		treadmill	maximal	NA	Participants with either two or more cardiovascular risk factors combined with an age of . 50 years or with a BP . 180/110 mm Hg were excluded (n 5 18).			BMI (kg/m2)				x							NR	sex, age, VPA, MVPA, (accelerometer wear time)	x	x				x
18	122		2016	Dyrstad	Cardiorespiratory fitness in groups with different physical activity levels	cross-sectional	Norway		NR	NR			examine how difference levels of self reported and objectively measured PA, including sedentary time reflect variation in Vo2max	729	multi center study including 9 regional test centers throughout Norway. Representative sample from cachment areas were drawn from population registries	The only inclusion criterion was that the participants had to be between ages 20 and 85 yr. T	86 did not wear the accelerometer, 14 had defective monitors, and 118 participants were excluded for providing less than 4 d of valid accelerometer data,	0.94	NA	Norweigan men and women aged 20-84	20-84	0.48	VO2max (ml/kg/min)		treadmill	maximal	NA	Participants with either two or more cardiovascular risk factors combined with an age of . 50 years or with a BP . 180/110 mm Hg were excluded (n 5 18).			VPA (min/day), cat. In none vs. Any						x					and vigorous intensity PA (> 6 METs) was defined as 5999 cpm or more (Troiano et al., 2008). Mean minutes/day at different intensities was calculated as the sum of all minutes where the count met the criterion for that intensity,	sex, age, BMI,,MVPA, (accelerometer wear time)	x	x		x		x
18	123		2016	Dyrstad	Cardiorespiratory fitness in groups with different physical activity levels	cross-sectional	Norway		NR	NR			examine how difference levels of self reported and objectively measured PA, including sedentary time reflect variation in Vo2max	729	multi center study including 9 regional test centers throughout Norway. Representative sample from cachment areas were drawn from population registries	The only inclusion criterion was that the participants had to be between ages 20 and 85 yr. T	86 did not wear the accelerometer, 14 had defective monitors, and 118 participants were excluded for providing less than 4 d of valid accelerometer data,	0.94	NA	Norweigan men and women aged 20-84	20-84	0.48	VO2max (ml/kg/min)		treadmill	maximal	NA	Participants with either two or more cardiovascular risk factors combined with an age of . 50 years or with a BP . 180/110 mm Hg were excluded (n 5 18).			MVPA (min/day)						x					Moderate intensity was defined as cpm between 2020 and 5998 [3–6 metabolic equivalent tasks (METs)], and vigorous intensity PA (> 6 METs) was defined as 5999 cpm or more (Troiano et al., 2008). Mean minutes/day at different intensities was calculated as the sum of all minutes where the count met the criterion for that intensity,	sex, age, BMI, VPA, (accelerometer wear time)	x	x		x		x
19	124	x	1987	Farrell	The independent effect of ethnicity on CRF	cross-sectional	US	NoA	NA	1982	High	0.418605	examine baseline differences in various fitness-related variables among a group of white, black and mexican american women of similar socioeconomic status, job classification and educational background, who were all enrolled in a worksite health promotion program	1967	participants in voluntary and subsidized health promotion program offered to all teaching and non-teaching employees of the Dallas Independent School District.	teaching and non-teaching employees DISD	NR	NA	NA	ethnically mized female teacher and non-teaching employees of DISD	NR	1	Exercise test duration (sec)	.	treadmill	submaximal	NA		Bruce protocol	.	white			x								self report	age, percentage body fat, number of cigarettes daily, PA, resting blood pressure, resting heart rate	x			x		x
20	125	x	2013	Finger	Cardiorespiratory fitness among adults in Germany	cross-sectional	Germany	EU	DEGS	2008-2011	Low	0.94186	to examine the state of cardiorespiratory fitness among men and women aged 18–64 according to age groups and socioeconomic status. Furthermore, the aim is to analyse whether test-qualified and test-unqualified participants differ according to selected variables.	2726	a random sample from local population registries was drawn to complete partic- ipants of the German National Health Interview and Examination Survey 1998 (GNHIES98).		Persons who were unknown as residents at the drawn address (37.4%) or who had moved away (17.4%) accounted for the largest shares of the non-eligible group, totalling more than half. Another 17.7% predominantly lived in houses situated outside the sample point. In addition, 25.9% of the noneligible group concerned persons who, due to an insufficient command of German, were not eligible to partici…	57.2%	NA	adult residents of Germany	18-79	0.52	VO2max (ml/kg/min)	.	cycle	submaximal	To be included, participants had to give written informed consent, be aged 18–64 and be test-qualified accord- ing to a modified version of the Physical Activity Readiness—Questionnaire (PAR-Q) (PARQ was used to screen the physical-activity readiness status of the 18- to 64-year-old participants, using nine questions to minimise the risk of events during the study) (Doctor consultation: In case t…	Presence of any of nine contraindications from PARQ + doctor advice to exclude or doctor confirmation of the following contraindications: “heart condition and physical activity only under medical supervision”, “prescribed medication for high blood pressure or heart or breathing problems” and “pregnancy beyond the 11th week" Exclusion after test qualification: refusal (n=25), problems with communi…	WHO protocol	.	Socioeconomic Status low intermediate high					x						self-reported (questionnaire)	Age, sex	x	x
21	126	x	1988	Fleg_1	Role of muscle loss in the age-associated reduction in VO, max	cross-sectional	US	NoA	BLSA	NR	Medium	0.487805	investigate the extent to which decline in Vo2max could be attributable to the age-associated loss of metabolically active tissue, i.e muscle, we measured 24-h urinary creatinine excretion.	184	self recruited group who visit NIA Gerontology Research Center every 2 yearse for 2.5 day testing sessions. Initial group of participants recruited relatives, friends, coworkers.	apparently healthy, independent community dwelling participants of the BLSA. Normotensive(<160/95mmHg resting blood pressure), nonobese (BMI<30kg/m2, non-endurance trained (regular aerboc exercise at least 30 mins 3x weekly), no medication that may affect cardiopulmonary function, achievement of true VO2max during maximal treadmill exercise (no Vo2max increas>2ml/kg/min from penultimate work load…	clinical heart disease,	NA	NA	active, but non-endurance trained community dwelling population	22-87	0.55	VO2max (ml/kg/min)	.	treadmill	maximal	apparently healthy, independent community dwelling participants of the BLSA. Normotensive(<160/95mmHg resting blood pressure), nonobese (BMI<30kg/m2, non-endurance trained (regular aerboc exercise at least 30 mins 3x weekly), no medication that may affect cardiopulmonary function, achievement of true VO2max during maximal treadmill exercise (no Vo2max increas>2ml/kg/min from penultimate work load…	NA		x	creatinine excretion									x		index of total muscle mass. Creatinine content of urine, only collections containing >400mg of creatinine per 24 hours were complete.	age	x
22	127	x	2005	Fleg_2	Accelerated Longitudinal Decline of Aerobic Capacity in Healthy Older Adults	longitudinal	US	NoA	BLSA	1978-1998	Medium	0.487805	The present study, therefore, was designed to examine longitudinal changes in peak V˙ O2 and its components, peak heart rate and oxygen pulse (the product of stroke volume and arteriovenous O2 difference), in non– endurance-trained BLSA men and women across a broad age range. We hypothesized that longitudinal decline in peak V˙ O2 would exceed cross-sectional decline and that physical activity le…	810	self recruited group who visit NIA Gerontology Research Center every 2 yearse for 2.5 day testing sessions. Initial group of participants recruited relatives, friends, coworkers.	apparently healthy, independent community dwelling participants of the BLSA. Normotensive(<160/95mmHg resting blood pressure), nonobese (BMI<30kg/m2, non-endurance trained (regular aerboc exercise at least 30 mins 3x weekly), no medication that may affect cardiopulmonary function, achievement of true VO2max during maximal treadmill exercise (no Vo2max increas>2ml/kg/min from penultimate work load…	clinical coronary heart disease (defined by a history of angina pectoris, myocardial infarction, coronary revascularization, or significant Q waves on ECG), other significant cardiopulmonary disease, or major orthopedic/neurological disability	NA	NA	healthy adults	21-87	0.46	VO2max (ml/kg/min)	.	treadmill	maximal	apparently healthy, independent community dwelling participants of the BLSA. Normotensive(<160/95mmHg resting blood pressure), nonobese (BMI<30kg/m2, non-endurance trained (regular aerboc exercise at least 30 mins 3x weekly), no medication that may affect cardiopulmonary function, achievement of true VO2max during maximal treadmill exercise (no Vo2max increas>2ml/kg/min from penultimate work load…	submaximal tests, tests of participants using beta blockers	Balke protocol, gas analyses	x	Fage (age at first exam)											First age (FAge) is the age of the volunteer at the first examination in which a maximal treadmill test with peak V˙ O2 determination was performed.	Fage^2, time, Fagextime, Fage^2xtime, sex, Fagexsex, timexsex, Fagextimexsex, ACTHI-1, 2, 3, current smoking, FFM, FagexFFM, timexFFM, Vo2maxmethod	x	x				x
22	128		2005	Fleg_2	Accelerated Longitudinal Decline of Aerobic Capacity in Healthy Older Adults	longitudinal	US		BLSA	1978-1998			The present study, therefore, was designed to examine longitudinal changes in peak V˙ O2 and its components, peak heart rate and oxygen pulse (the product of stroke volume and arteriovenous O2 difference), in non– endurance-trained BLSA men and women across a broad age range. We hypothesized that longitudinal decline in peak V˙ O2 would exceed cross-sectional decline and that physical activity le…	810	self recruited group who visit NIA Gerontology Research Center every 2 yearse for 2.5 day testing sessions. Initial group of participants recruited relatives, friends, coworkers.	apparently healthy, independent community dwelling participants of the BLSA. Normotensive(<160/95mmHg resting blood pressure), nonobese (BMI<30kg/m2, non-endurance trained (regular aerboc exercise at least 30 mins 3x weekly), no medication that may affect cardiopulmonary function, achievement of true VO2max during maximal treadmill exercise (no Vo2max increas>2ml/kg/min from penultimate work load…	clinical heart disease, use of beta blockers	NA	NA	healthy adults	21-87	0.46	VO2max (ml/kg/min)		treadmill	maximal	apparently healthy, independent community dwelling participants of the BLSA. Normotensive(<160/95mmHg resting blood pressure), nonobese (BMI<30kg/m2, non-endurance trained (regular aerboc exercise at least 30 mins 3x weekly), no medication that may affect cardiopulmonary function, achievement of true VO2max during maximal treadmill exercise (no Vo2max increas>2ml/kg/min from penultimate work load…	submaximal tests, tests of participants using beta blockers			Fage^2	x										First age (FAge) is the age of the volunteer at the first examination in which a maximal treadmill test with peak V˙ O2 determination was performed.	Fage, time, Fagextime, Fage^2xtime, sex, Fagexsex, timexsex, Fagextimexsex, ACTHI-1, 2, 3, current smoking, FFM, FagexFFM, timexFFM, Vo2maxmethod	x	x				x
22	129		2005	Fleg_2	Accelerated Longitudinal Decline of Aerobic Capacity in Healthy Older Adults	longitudinal	US		BLSA	1978-1998			The present study, therefore, was designed to examine longitudinal changes in peak V˙ O2 and its components, peak heart rate and oxygen pulse (the product of stroke volume and arteriovenous O2 difference), in non– endurance-trained BLSA men and women across a broad age range. We hypothesized that longitudinal decline in peak V˙ O2 would exceed cross-sectional decline and that physical activity le…	810	self recruited group who visit NIA Gerontology Research Center every 2 yearse for 2.5 day testing sessions. Initial group of participants recruited relatives, friends, coworkers.	apparently healthy, independent community dwelling participants of the BLSA. Normotensive(<160/95mmHg resting blood pressure), nonobese (BMI<30kg/m2, non-endurance trained (regular aerboc exercise at least 30 mins 3x weekly), no medication that may affect cardiopulmonary function, achievement of true VO2max during maximal treadmill exercise (no Vo2max increas>2ml/kg/min from penultimate work load…	clinical heart disease, use of beta blockers	NA	NA	healthy adults	21-87	0.46	VO2max (ml/kg/min)		treadmill	maximal	apparently healthy, independent community dwelling participants of the BLSA. Normotensive(<160/95mmHg resting blood pressure), nonobese (BMI<30kg/m2, non-endurance trained (regular aerboc exercise at least 30 mins 3x weekly), no medication that may affect cardiopulmonary function, achievement of true VO2max during maximal treadmill exercise (no Vo2max increas>2ml/kg/min from penultimate work load…	submaximal tests, tests of participants using beta blockers			Time(y) (time between first and most recent Vo2peak measurement										x	Time in the study is the length of time in years between the first and most recent peak V˙ O2 measurement.	Fage, Fage^2, Fagextime, Fage^2xtime, sex, Fagexsex, timexsex, Fagextimexsex, ACTHI-1, 2, 3, current smoking, FFM, FagexFFM, timexFFM, Vo2maxmethod	x	x				x
22	130		2005	Fleg_2	Accelerated Longitudinal Decline of Aerobic Capacity in Healthy Older Adults	longitudinal	US		BLSA	1978-1998			The present study, therefore, was designed to examine longitudinal changes in peak V˙ O2 and its components, peak heart rate and oxygen pulse (the product of stroke volume and arteriovenous O2 difference), in non– endurance-trained BLSA men and women across a broad age range. We hypothesized that longitudinal decline in peak V˙ O2 would exceed cross-sectional decline and that physical activity le…	810	self recruited group who visit NIA Gerontology Research Center every 2 yearse for 2.5 day testing sessions. Initial group of participants recruited relatives, friends, coworkers.	apparently healthy, independent community dwelling participants of the BLSA. Normotensive(<160/95mmHg resting blood pressure), nonobese (BMI<30kg/m2, non-endurance trained (regular aerboc exercise at least 30 mins 3x weekly), no medication that may affect cardiopulmonary function, achievement of true VO2max during maximal treadmill exercise (no Vo2max increas>2ml/kg/min from penultimate work load…	clinical heart disease, use of beta blockers	NA	NA	healthy adults	21-87	0.46	VO2max (ml/kg/min)		treadmill	maximal	apparently healthy, independent community dwelling participants of the BLSA. Normotensive(<160/95mmHg resting blood pressure), nonobese (BMI<30kg/m2, non-endurance trained (regular aerboc exercise at least 30 mins 3x weekly), no medication that may affect cardiopulmonary function, achievement of true VO2max during maximal treadmill exercise (no Vo2max increas>2ml/kg/min from penultimate work load…	submaximal tests, tests of participants using beta blockers			Fagextime										x	interaction term	Fage, Fage^2, time, Fage^2xtime, sex, Fagexsex, timexsex, Fagextimexsex, ACTHI-1, 2, 3, current smoking, FFM, FagexFFM, timexFFM, Vo2maxmethod	x	x				x
22	131		2005	Fleg_2	Accelerated Longitudinal Decline of Aerobic Capacity in Healthy Older Adults	longitudinal	US		BLSA	1978-1998			The present study, therefore, was designed to examine longitudinal changes in peak V˙ O2 and its components, peak heart rate and oxygen pulse (the product of stroke volume and arteriovenous O2 difference), in non– endurance-trained BLSA men and women across a broad age range. We hypothesized that longitudinal decline in peak V˙ O2 would exceed cross-sectional decline and that physical activity le…	810	self recruited group who visit NIA Gerontology Research Center every 2 yearse for 2.5 day testing sessions. Initial group of participants recruited relatives, friends, coworkers.	apparently healthy, independent community dwelling participants of the BLSA. Normotensive(<160/95mmHg resting blood pressure), nonobese (BMI<30kg/m2, non-endurance trained (regular aerboc exercise at least 30 mins 3x weekly), no medication that may affect cardiopulmonary function, achievement of true VO2max during maximal treadmill exercise (no Vo2max increas>2ml/kg/min from penultimate work load…	clinical heart disease, use of beta blockers	NA	NA	healthy adults	21-87	0.46	VO2max (ml/kg/min)		treadmill	maximal	apparently healthy, independent community dwelling participants of the BLSA. Normotensive(<160/95mmHg resting blood pressure), nonobese (BMI<30kg/m2, non-endurance trained (regular aerboc exercise at least 30 mins 3x weekly), no medication that may affect cardiopulmonary function, achievement of true VO2max during maximal treadmill exercise (no Vo2max increas>2ml/kg/min from penultimate work load…	submaximal tests, tests of participants using beta blockers			Fage^2xtime										x	interaction term	Fage, Fage^2, time, Fagextime, sex, Fagexsex, timexsex, Fagextimexsex, ACTHI-1, 2, 3, current smoking, FFM, FagexFFM, timexFFM, Vo2maxmethod	x	x				x
22	132		2005	Fleg_2	Accelerated Longitudinal Decline of Aerobic Capacity in Healthy Older Adults	longitudinal	US		BLSA	1978-1998			The present study, therefore, was designed to examine longitudinal changes in peak V˙ O2 and its components, peak heart rate and oxygen pulse (the product of stroke volume and arteriovenous O2 difference), in non– endurance-trained BLSA men and women across a broad age range. We hypothesized that longitudinal decline in peak V˙ O2 would exceed cross-sectional decline and that physical activity le…	810	self recruited group who visit NIA Gerontology Research Center every 2 yearse for 2.5 day testing sessions. Initial group of participants recruited relatives, friends, coworkers.	apparently healthy, independent community dwelling participants of the BLSA. Normotensive(<160/95mmHg resting blood pressure), nonobese (BMI<30kg/m2, non-endurance trained (regular aerboc exercise at least 30 mins 3x weekly), no medication that may affect cardiopulmonary function, achievement of true VO2max during maximal treadmill exercise (no Vo2max increas>2ml/kg/min from penultimate work load…	clinical heart disease, use of beta blockers	NA	NA	healthy adults	21-87	0.46	VO2max (ml/kg/min)		treadmill	maximal	apparently healthy, independent community dwelling participants of the BLSA. Normotensive(<160/95mmHg resting blood pressure), nonobese (BMI<30kg/m2, non-endurance trained (regular aerboc exercise at least 30 mins 3x weekly), no medication that may affect cardiopulmonary function, achievement of true VO2max during maximal treadmill exercise (no Vo2max increas>2ml/kg/min from penultimate work load…	submaximal tests, tests of participants using beta blockers			sex		x									self report	Fage, Fage^2, time, Fagextime, Fage^2xtime, Fagexsex, timexsex, Fagextimexsex, ACTHI-1, 2, 3, current smoking, FFM, FagexFFM, timexFFM, Vo2maxmethod	x					x
22	133		2005	Fleg_2	Accelerated Longitudinal Decline of Aerobic Capacity in Healthy Older Adults	longitudinal	US		BLSA	1978-1998			The present study, therefore, was designed to examine longitudinal changes in peak V˙ O2 and its components, peak heart rate and oxygen pulse (the product of stroke volume and arteriovenous O2 difference), in non– endurance-trained BLSA men and women across a broad age range. We hypothesized that longitudinal decline in peak V˙ O2 would exceed cross-sectional decline and that physical activity le…	810	self recruited group who visit NIA Gerontology Research Center every 2 yearse for 2.5 day testing sessions. Initial group of participants recruited relatives, friends, coworkers.	apparently healthy, independent community dwelling participants of the BLSA. Normotensive(<160/95mmHg resting blood pressure), nonobese (BMI<30kg/m2, non-endurance trained (regular aerboc exercise at least 30 mins 3x weekly), no medication that may affect cardiopulmonary function, achievement of true VO2max during maximal treadmill exercise (no Vo2max increas>2ml/kg/min from penultimate work load…	clinical heart disease, use of beta blockers	NA	NA	healthy adults	21-87	0.46	VO2max (ml/kg/min)		treadmill	maximal	apparently healthy, independent community dwelling participants of the BLSA. Normotensive(<160/95mmHg resting blood pressure), nonobese (BMI<30kg/m2, non-endurance trained (regular aerboc exercise at least 30 mins 3x weekly), no medication that may affect cardiopulmonary function, achievement of true VO2max during maximal treadmill exercise (no Vo2max increas>2ml/kg/min from penultimate work load…	submaximal tests, tests of participants using beta blockers			Fagexsex										x	interaction term	Fage, Fage^2, time, Fagextime, Fage^2xtime, sex, timexsex, Fagextimexsex, ACTHI-1, 2, 3, current smoking, FFM, FagexFFM, timexFFM, Vo2maxmethod	x	x				x
22	134		2005	Fleg_2	Accelerated Longitudinal Decline of Aerobic Capacity in Healthy Older Adults	longitudinal	US		BLSA	1978-1998			The present study, therefore, was designed to examine longitudinal changes in peak V˙ O2 and its components, peak heart rate and oxygen pulse (the product of stroke volume and arteriovenous O2 difference), in non– endurance-trained BLSA men and women across a broad age range. We hypothesized that longitudinal decline in peak V˙ O2 would exceed cross-sectional decline and that physical activity le…	810	self recruited group who visit NIA Gerontology Research Center every 2 yearse for 2.5 day testing sessions. Initial group of participants recruited relatives, friends, coworkers.	apparently healthy, independent community dwelling participants of the BLSA. Normotensive(<160/95mmHg resting blood pressure), nonobese (BMI<30kg/m2, non-endurance trained (regular aerboc exercise at least 30 mins 3x weekly), no medication that may affect cardiopulmonary function, achievement of true VO2max during maximal treadmill exercise (no Vo2max increas>2ml/kg/min from penultimate work load…	clinical heart disease, use of beta blockers	NA	NA	healthy adults	21-87	0.46	VO2max (ml/kg/min)		treadmill	maximal	apparently healthy, independent community dwelling participants of the BLSA. Normotensive(<160/95mmHg resting blood pressure), nonobese (BMI<30kg/m2, non-endurance trained (regular aerboc exercise at least 30 mins 3x weekly), no medication that may affect cardiopulmonary function, achievement of true VO2max during maximal treadmill exercise (no Vo2max increas>2ml/kg/min from penultimate work load…	submaximal tests, tests of participants using beta blockers			timexsex										x	interaction term	Fage, Fage^2, time, Fagextime, Fage^2xtime, sex, Fagexsex, Fagextimexsex, ACTHI-1, 2, 3, current smoking, FFM, FagexFFM, timexFFM, Vo2maxmethod	x	x				x
22	135		2005	Fleg_2	Accelerated Longitudinal Decline of Aerobic Capacity in Healthy Older Adults	longitudinal	US		BLSA	1978-1998			The present study, therefore, was designed to examine longitudinal changes in peak V˙ O2 and its components, peak heart rate and oxygen pulse (the product of stroke volume and arteriovenous O2 difference), in non– endurance-trained BLSA men and women across a broad age range. We hypothesized that longitudinal decline in peak V˙ O2 would exceed cross-sectional decline and that physical activity le…	810	self recruited group who visit NIA Gerontology Research Center every 2 yearse for 2.5 day testing sessions. Initial group of participants recruited relatives, friends, coworkers.	apparently healthy, independent community dwelling participants of the BLSA. Normotensive(<160/95mmHg resting blood pressure), nonobese (BMI<30kg/m2, non-endurance trained (regular aerboc exercise at least 30 mins 3x weekly), no medication that may affect cardiopulmonary function, achievement of true VO2max during maximal treadmill exercise (no Vo2max increas>2ml/kg/min from penultimate work load…	clinical heart disease, use of beta blockers	NA	NA	healthy adults	21-87	0.46	VO2max (ml/kg/min)		treadmill	maximal	apparently healthy, independent community dwelling participants of the BLSA. Normotensive(<160/95mmHg resting blood pressure), nonobese (BMI<30kg/m2, non-endurance trained (regular aerboc exercise at least 30 mins 3x weekly), no medication that may affect cardiopulmonary function, achievement of true VO2max during maximal treadmill exercise (no Vo2max increas>2ml/kg/min from penultimate work load…	submaximal tests, tests of participants using beta blockers			Fagextimexsex										x	interaction term	Fage, Fage^2, time, Fagextime, Fage^2xtime, sex, Fagexsex, timexsex, ACTHI-1, 2, 3, current smoking, FFM, FagexFFM, timexFFM, Vo2maxmethod	x	x				x
22	136		2005	Fleg_2	Accelerated Longitudinal Decline of Aerobic Capacity in Healthy Older Adults	longitudinal	US		BLSA	1978-1998			The present study, therefore, was designed to examine longitudinal changes in peak V˙ O2 and its components, peak heart rate and oxygen pulse (the product of stroke volume and arteriovenous O2 difference), in non– endurance-trained BLSA men and women across a broad age range. We hypothesized that longitudinal decline in peak V˙ O2 would exceed cross-sectional decline and that physical activity le…	810	self recruited group who visit NIA Gerontology Research Center every 2 yearse for 2.5 day testing sessions. Initial group of participants recruited relatives, friends, coworkers.	apparently healthy, independent community dwelling participants of the BLSA. Normotensive(<160/95mmHg resting blood pressure), nonobese (BMI<30kg/m2, non-endurance trained (regular aerboc exercise at least 30 mins 3x weekly), no medication that may affect cardiopulmonary function, achievement of true VO2max during maximal treadmill exercise (no Vo2max increas>2ml/kg/min from penultimate work load…	clinical heart disease, use of beta blockers	NA	NA	healthy adults	21-87	0.46	VO2max (ml/kg/min)		treadmill	maximal	apparently healthy, independent community dwelling participants of the BLSA. Normotensive(<160/95mmHg resting blood pressure), nonobese (BMI<30kg/m2, non-endurance trained (regular aerboc exercise at least 30 mins 3x weekly), no medication that may affect cardiopulmonary function, achievement of true VO2max during maximal treadmill exercise (no Vo2max increas>2ml/kg/min from penultimate work load…	submaximal tests, tests of participants using beta blockers			ACTHI-1 (quartile 1 high intensity leisure time activity)						x					Leisure-time physical activity (LTPA) was self-reported on the basis of the amount of time spent performing 97 activities since the last biennial visit as previously	Fage, Fage^2, time, Fagextime, Fage^2xtime, sex, Fagexsex, timexsex, Fagextimexsex, ACTHI- 2, 3, current smoking, FFM, FagexFFM, timexFFM, Vo2maxmethod	x	x				x
22	137		2005	Fleg_2	Accelerated Longitudinal Decline of Aerobic Capacity in Healthy Older Adults	longitudinal	US		BLSA	1978-1998			The present study, therefore, was designed to examine longitudinal changes in peak V˙ O2 and its components, peak heart rate and oxygen pulse (the product of stroke volume and arteriovenous O2 difference), in non– endurance-trained BLSA men and women across a broad age range. We hypothesized that longitudinal decline in peak V˙ O2 would exceed cross-sectional decline and that physical activity le…	810	self recruited group who visit NIA Gerontology Research Center every 2 yearse for 2.5 day testing sessions. Initial group of participants recruited relatives, friends, coworkers.	apparently healthy, independent community dwelling participants of the BLSA. Normotensive(<160/95mmHg resting blood pressure), nonobese (BMI<30kg/m2, non-endurance trained (regular aerboc exercise at least 30 mins 3x weekly), no medication that may affect cardiopulmonary function, achievement of true VO2max during maximal treadmill exercise (no Vo2max increas>2ml/kg/min from penultimate work load…	clinical heart disease, use of beta blockers	NA	NA	healthy adults	21-87	0.46	VO2max (ml/kg/min)		treadmill	maximal	apparently healthy, independent community dwelling participants of the BLSA. Normotensive(<160/95mmHg resting blood pressure), nonobese (BMI<30kg/m2, non-endurance trained (regular aerboc exercise at least 30 mins 3x weekly), no medication that may affect cardiopulmonary function, achievement of true VO2max during maximal treadmill exercise (no Vo2max increas>2ml/kg/min from penultimate work load…	submaximal tests, tests of participants using beta blockers			current smoking							x				A “never smoker” was defined as a person who smoked ⬍100 cigarettes in his or her lifetime, a “current smoker” (Cursmk) as a volunteer who was currently smoking ⱖ10 cigarettes a day, and a “former smoker” as a participant previously defined as a smoker who no longer met the definition on his or her index BLSA visit.	Fage, Fage^2, time, Fagextime, Fage^2xtime, sex, Fagexsex, timexsex, Fagextimexsex, ACTHI-1, 2, 3, FFM, FagexFFM, timexFFM, Vo2maxmethod	x	x				x
22	138		2005	Fleg_2	Accelerated Longitudinal Decline of Aerobic Capacity in Healthy Older Adults	longitudinal	US		BLSA	1978-1998			The present study, therefore, was designed to examine longitudinal changes in peak V˙ O2 and its components, peak heart rate and oxygen pulse (the product of stroke volume and arteriovenous O2 difference), in non– endurance-trained BLSA men and women across a broad age range. We hypothesized that longitudinal decline in peak V˙ O2 would exceed cross-sectional decline and that physical activity le…	810	self recruited group who visit NIA Gerontology Research Center every 2 yearse for 2.5 day testing sessions. Initial group of participants recruited relatives, friends, coworkers.	apparently healthy, independent community dwelling participants of the BLSA. Normotensive(<160/95mmHg resting blood pressure), nonobese (BMI<30kg/m2, non-endurance trained (regular aerboc exercise at least 30 mins 3x weekly), no medication that may affect cardiopulmonary function, achievement of true VO2max during maximal treadmill exercise (no Vo2max increas>2ml/kg/min from penultimate work load…	clinical heart disease, use of beta blockers	NA	NA	healthy adults	21-87	0.46	VO2max (ml/kg/min)		treadmill	maximal	apparently healthy, independent community dwelling participants of the BLSA. Normotensive(<160/95mmHg resting blood pressure), nonobese (BMI<30kg/m2, non-endurance trained (regular aerboc exercise at least 30 mins 3x weekly), no medication that may affect cardiopulmonary function, achievement of true VO2max during maximal treadmill exercise (no Vo2max increas>2ml/kg/min from penultimate work load…	submaximal tests, tests of participants using beta blockers			FFM (fat free mass kg)				x							Fat-free mass (FFM) was calculated as weight ⫺ total body fat.	Fage, Fage^2, time, Fagextime, Fage^2xtime, sex, Fagexsex, timexsex, Fagextimexsex, ACTHI-1, 2, 3, current smoking, FagexFFM, timexFFM, Vo2maxmethod	x	x				x
22	139		2005	Fleg_2	Accelerated Longitudinal Decline of Aerobic Capacity in Healthy Older Adults	longitudinal	US		BLSA	1978-1998			The present study, therefore, was designed to examine longitudinal changes in peak V˙ O2 and its components, peak heart rate and oxygen pulse (the product of stroke volume and arteriovenous O2 difference), in non– endurance-trained BLSA men and women across a broad age range. We hypothesized that longitudinal decline in peak V˙ O2 would exceed cross-sectional decline and that physical activity le…	810	self recruited group who visit NIA Gerontology Research Center every 2 yearse for 2.5 day testing sessions. Initial group of participants recruited relatives, friends, coworkers.	apparently healthy, independent community dwelling participants of the BLSA. Normotensive(<160/95mmHg resting blood pressure), nonobese (BMI<30kg/m2, non-endurance trained (regular aerboc exercise at least 30 mins 3x weekly), no medication that may affect cardiopulmonary function, achievement of true VO2max during maximal treadmill exercise (no Vo2max increas>2ml/kg/min from penultimate work load…	clinical heart disease, use of beta blockers	NA	NA	healthy adults	21-87	0.46	VO2max (ml/kg/min)		treadmill	maximal	apparently healthy, independent community dwelling participants of the BLSA. Normotensive(<160/95mmHg resting blood pressure), nonobese (BMI<30kg/m2, non-endurance trained (regular aerboc exercise at least 30 mins 3x weekly), no medication that may affect cardiopulmonary function, achievement of true VO2max during maximal treadmill exercise (no Vo2max increas>2ml/kg/min from penultimate work load…	submaximal tests, tests of participants using beta blockers			FagexFFM										x	interaction term	Fage, Fage^2, time, Fagextime, Fage^2xtime, sex, Fagexsex, timexsex, Fagextimexsex, ACTHI-1, 2, 3, current smoking, FFM, timexFFM, Vo2maxmethod	x	x				x
22	140		2005	Fleg_2	Accelerated Longitudinal Decline of Aerobic Capacity in Healthy Older Adults	longitudinal	US		BLSA	1978-1998			The present study, therefore, was designed to examine longitudinal changes in peak V˙ O2 and its components, peak heart rate and oxygen pulse (the product of stroke volume and arteriovenous O2 difference), in non– endurance-trained BLSA men and women across a broad age range. We hypothesized that longitudinal decline in peak V˙ O2 would exceed cross-sectional decline and that physical activity le…	810	self recruited group who visit NIA Gerontology Research Center every 2 yearse for 2.5 day testing sessions. Initial group of participants recruited relatives, friends, coworkers.	apparently healthy, independent community dwelling participants of the BLSA. Normotensive(<160/95mmHg resting blood pressure), nonobese (BMI<30kg/m2, non-endurance trained (regular aerboc exercise at least 30 mins 3x weekly), no medication that may affect cardiopulmonary function, achievement of true VO2max during maximal treadmill exercise (no Vo2max increas>2ml/kg/min from penultimate work load…	clinical heart disease, use of beta blockers	NA	NA	healthy adults	21-87	0.46	VO2max (ml/kg/min)		treadmill	maximal	apparently healthy, independent community dwelling participants of the BLSA. Normotensive(<160/95mmHg resting blood pressure), nonobese (BMI<30kg/m2, non-endurance trained (regular aerboc exercise at least 30 mins 3x weekly), no medication that may affect cardiopulmonary function, achievement of true VO2max during maximal treadmill exercise (no Vo2max increas>2ml/kg/min from penultimate work load…	submaximal tests, tests of participants using beta blockers			timexFFM										x	interaction term	Fage, Fage^2, time, Fagextime, Fage^2xtime, sex, Fagexsex, timexsex, Fagextimexsex, ACTHI-1, 2, 3, current smoking, FFM, FagexFFM, Vo2maxmethod	x	x				x
22	141		2005	Fleg_2	Accelerated Longitudinal Decline of Aerobic Capacity in Healthy Older Adults	longitudinal	US		BLSA	1978-1998			The present study, therefore, was designed to examine longitudinal changes in peak V˙ O2 and its components, peak heart rate and oxygen pulse (the product of stroke volume and arteriovenous O2 difference), in non– endurance-trained BLSA men and women across a broad age range. We hypothesized that longitudinal decline in peak V˙ O2 would exceed cross-sectional decline and that physical activity le…	810	self recruited group who visit NIA Gerontology Research Center every 2 yearse for 2.5 day testing sessions. Initial group of participants recruited relatives, friends, coworkers.	apparently healthy, independent community dwelling participants of the BLSA. Normotensive(<160/95mmHg resting blood pressure), nonobese (BMI<30kg/m2, non-endurance trained (regular aerboc exercise at least 30 mins 3x weekly), no medication that may affect cardiopulmonary function, achievement of true VO2max during maximal treadmill exercise (no Vo2max increas>2ml/kg/min from penultimate work load…	clinical heart disease, use of beta blockers	NA	NA	healthy adults	21-87	0.46	VO2max (ml/kg/min)		treadmill	maximal	apparently healthy, independent community dwelling participants of the BLSA. Normotensive(<160/95mmHg resting blood pressure), nonobese (BMI<30kg/m2, non-endurance trained (regular aerboc exercise at least 30 mins 3x weekly), no medication that may affect cardiopulmonary function, achievement of true VO2max during maximal treadmill exercise (no Vo2max increas>2ml/kg/min from penultimate work load…	submaximal tests, tests of participants using beta blockers			Vo2method (before/after Dec 1990)										x	VO2 Method is 0 for the first measurement method (before December 1990) and 1 for the second measurement method.	Fage, Fage^2, time, Fagextime, Fage^2xtime, sex, Fagexsex, timexsex, Fagextimexsex, ACTHI-1, 2, 3, current smoking, FFM, FagexFFM, timexFFM	x	x				x
23	142	x	2006	Fogelholm	Waist circumference and BMI are independently associated with the variation of cardio-respiratory and neuromuscular fitness in young adult men	cross-sectional	Finland	EU	NA	2003	Low	0.697674	(1) to describe the relationship between obesity (as measured by BMI and WC) and health-related fitness (including CRF and several components of NMF); (2) to test the hypothesis that health-related fitness is associated with both BMI and WC, independently of each other and of the level of physical activity; (3) to test the hypothesis that the association between BMI and WC is related to both CRF …	951	All men invited to six nonspecialized troop refresher trainings (n=1472) during 2003 were also invited to participate in the measurements of health-related fitness. The trainings were geographically distributed over the southern, eastern and northern regions of Finland (two trainings in each region).	men invited to nonspecialized Finnish Defense forces refresher trainings	refusal to participate in fitness test	0.746	NA	healthy finnish men	21-43	0	VO2max (ml/kg/min)	.	cycle	maximal	NR	NR	individual, Astrand	x	BMI (kg/m2)				x							Body weight and height, in very light clothing and without shoes, were measured in the beginning of the health assessment.	WC, PA, age, education, residence area , smoking status	x			x	x	x
23	143		2006	Fogelholm	Waist circumference and BMI are independently associated with the variation of cardio-respiratory and neuromuscular fitness in young adult men	cross-sectional	Finland		NA	2003			(1) to describe the relationship between obesity (as measured by BMI and WC) and health-related fitness (including CRF and several components of NMF); (2) to test the hypothesis that health-related fitness is associated with both BMI and WC, independently of each other and of the level of physical activity; (3) to test the hypothesis that the association between BMI and WC is related to both CRF …	951	All men invited to six nonspecialized troop refresher trainings (n¼1472) during 2003 were also invited to participate in the measurements of health-related fitness. The trainings were geographically distributed over the southern, eastern and northern regions of Finland (two trainings in each region).	men invited to nonspecialized Finnish Defense forces refresher trainings	refusal to participate in fitness test	0.746	NA	healthy finnish men	21-43	0	VO2max (ml/kg/min)		cycle	maximal	NR	NR			WC (cm)				x							Waist circumference was measured three times at the midway between the lowest rib and iliac crest, after a normal out-breathing, and the mean value was used. The health assessment was carried out by a physician and military nurses.	BMI, PA, age, education, residence area , smoking status	x			x	x	x
23	144		2006	Fogelholm	Waist circumference and BMI are independently associated with the variation of cardio-respiratory and neuromuscular fitness in young adult men	cross-sectional	Finland		NA	2003			(1) to describe the relationship between obesity (as measured by BMI and WC) and health-related fitness (including CRF and several components of NMF); (2) to test the hypothesis that health-related fitness is associated with both BMI and WC, independently of each other and of the level of physical activity; (3) to test the hypothesis that the association between BMI and WC is related to both CRF …	951	All men invited to six nonspecialized troop refresher trainings (n¼1472) during 2003 were also invited to participate in the measurements of health-related fitness. The trainings were geographically distributed over the southern, eastern and northern regions of Finland (two trainings in each region).	men invited to nonspecialized Finnish Defense forces refresher trainings	refusal to participate in fitness test	0.746	NA	healthy finnish men	21-43	0	VO2max (ml/kg/min)		cycle	maximal	NR	NR			PA (times/week)						x					Pre-test health screening included measures of systolic and diastolic blood pressure, a modified Physical Activity Readiness Questionnaire and a question on perceived health status.22	BMI, WC,age, education, residence area , smoking status	x			x	x
23	145		2006	Fogelholm	Waist circumference and BMI are independently associated with the variation of cardio-respiratory and neuromuscular fitness in young adult men	cross-sectional	Finland		NA	2003			(1) to describe the relationship between obesity (as measured by BMI and WC) and health-related fitness (including CRF and several components of NMF); (2) to test the hypothesis that health-related fitness is associated with both BMI and WC, independently of each other and of the level of physical activity; (3) to test the hypothesis that the association between BMI and WC is related to both CRF …	951	All men invited to six nonspecialized troop refresher trainings (n¼1472) during 2003 were also invited to participate in the measurements of health-related fitness. The trainings were geographically distributed over the southern, eastern and northern regions of Finland (two trainings in each region).	men invited to nonspecialized Finnish Defense forces refresher trainings	refusal to participate in fitness test	0.746	NA	healthy finnish men	21-43	0	VO2max (ml/kg/min)		cycle	maximal	NR	NR			age (y)	x										self report	BMI, WC, PA, education, residence area , smoking status				x	x	x
23	146		2006	Fogelholm	Waist circumference and BMI are independently associated with the variation of cardio-respiratory and neuromuscular fitness in young adult men	cross-sectional	Finland		NA	2003			(1) to describe the relationship between obesity (as measured by BMI and WC) and health-related fitness (including CRF and several components of NMF); (2) to test the hypothesis that health-related fitness is associated with both BMI and WC, independently of each other and of the level of physical activity; (3) to test the hypothesis that the association between BMI and WC is related to both CRF …	951	All men invited to six nonspecialized troop refresher trainings (n¼1472) during 2003 were also invited to participate in the measurements of health-related fitness. The trainings were geographically distributed over the southern, eastern and northern regions of Finland (two trainings in each region).	men invited to nonspecialized Finnish Defense forces refresher trainings	refusal to participate in fitness test	0.746	NA	healthy finnish men	21-43	0	VO2max (ml/kg/min)		cycle	maximal	NR	NR			education (y)					x						self report	BMI, WC, PA, age, residence area , smoking status	x			x		x
23	147		2006	Fogelholm	Waist circumference and BMI are independently associated with the variation of cardio-respiratory and neuromuscular fitness in young adult men	cross-sectional	Finland		NA	2003			(1) to describe the relationship between obesity (as measured by BMI and WC) and health-related fitness (including CRF and several components of NMF); (2) to test the hypothesis that health-related fitness is associated with both BMI and WC, independently of each other and of the level of physical activity; (3) to test the hypothesis that the association between BMI and WC is related to both CRF …	951	All men invited to six nonspecialized troop refresher trainings (n¼1472) during 2003 were also invited to participate in the measurements of health-related fitness. The trainings were geographically distributed over the southern, eastern and northern regions of Finland (two trainings in each region).	men invited to nonspecialized Finnish Defense forces refresher trainings	refusal to participate in fitness test	0.746	NA	healthy finnish men	21-43	0	VO2max (ml/kg/min)		cycle	maximal	NR	NR			rural residence					x						self report	BMI, WC, PA, age, education, smoking status	x			x	x	x
23	148		2006	Fogelholm	Waist circumference and BMI are independently associated with the variation of cardio-respiratory and neuromuscular fitness in young adult men	cross-sectional	Finland		NA	2003			(1) to describe the relationship between obesity (as measured by BMI and WC) and health-related fitness (including CRF and several components of NMF); (2) to test the hypothesis that health-related fitness is associated with both BMI and WC, independently of each other and of the level of physical activity; (3) to test the hypothesis that the association between BMI and WC is related to both CRF …	951	All men invited to six nonspecialized troop refresher trainings (n¼1472) during 2003 were also invited to participate in the measurements of health-related fitness. The trainings were geographically distributed over the southern, eastern and northern regions of Finland (two trainings in each region).	men invited to nonspecialized Finnish Defense forces refresher trainings	refusal to participate in fitness test	0.746	NA	healthy finnish men	21-43	0	VO2max (ml/kg/min)		cycle	maximal	NR	NR			smoker (current/non)							x				self report	BMI, WC, PA, age, education, residence area	x			x	x	x
24	149	x	2003	Franks	PGC-1␣ Genotype Modifies the Association of Volitional Energy Expenditure with V˙ O2max	cross-sectional	UK	EU	MRC ELY	1990-1992 1994-1997	Low	0.711111	To explore whether a candidate polymorphism in the PGC-1␣ gene modifies the association between physical activity energy expenditure (PAEE) and predicted V˙ O2max (V˙ O2max.pred).	599	An initial sampling frame was constructed from all individuals aged 3040 years on 1 June 1994 who were registered with a large general practice in Ely, Cambridgeshire. One in ten random sampling was used to construct a sample of 365 individuals who were approached by letter co-signed by the subject’s general practitioner and the study co-ordinator. This followed a local media campaign and a publi…	Individuals age 40-65 registered at a large general practice in Ely, Cambridgeshire	NR	NR	NA	adults aged 40-65	40-65	0.57	VO2max (l/min)	.	cycle	submaximal	NR	NR	individual, breath analydrd (at each (3xin 5 min).	x	age(y)	x										self report	sex, smoking, weight, log fasting insulin, log2hr glucose, NEFA AUC, Gly482Ser, PAEE, PAEExGly4825Ser		x		x
24	150		2003	Franks	PGC-1␣ Genotype Modifies the Association of Volitional Energy Expenditure with V˙ O2max	cross-sectional	UK		MRC ELY	1990-1992 1994-1997			To explore whether a candidate polymorphism in the PGC-1␣ gene modifies the association between physical activity energy expenditure (PAEE) and predicted V˙ O2max (V˙ O2max.pred).	599	An initial sampling frame was constructed from all individuals aged 3040 years on 1 June 1994 who were registered with a large general practice in Ely, Cambridgeshire. One in ten random sampling was used to construct a sample of 365 individuals who were approached by letter co-signed by the subject’s general practitioner and the study co-ordinator. This followed a local media campaign and a publi…	Individuals age 40-65 registered at a large general practice in Ely, Cambridgeshire	NR	NR	NA	adults aged 40-65	40-65	0.57	VO2max (l/min)		cycle	submaximal	NR	NR	individual, breath analydrd (at each (3xin 5 min).		sex		x									self report	age, smoking, weight, log fasting insulin, log2hr glucose, NEFA AUC, Gly482Ser, PAEE, PAEExGly4825Ser	x			x
24	151		2003	Franks	PGC-1␣ Genotype Modifies the Association of Volitional Energy Expenditure with V˙ O2max	cross-sectional	UK		MRC ELY	1990-1992 1994-1997			To explore whether a candidate polymorphism in the PGC-1␣ gene modifies the association between physical activity energy expenditure (PAEE) and predicted V˙ O2max (V˙ O2max.pred).	599	An initial sampling frame was constructed from all individuals aged 3040 years on 1 June 1994 who were registered with a large general practice in Ely, Cambridgeshire. One in ten random sampling was used to construct a sample of 365 individuals who were approached by letter co-signed by the subject’s general practitioner and the study co-ordinator. This followed a local media campaign and a publi…	Individuals age 40-65 registered at a large general practice in Ely, Cambridgeshire	NR	NR	NA	adults aged 40-65	40-65	0.57	VO2max (l/min)		cycle	submaximal	NR	NR	individual, breath analydrd (at each (3xin 5 min).		smoking (never/ex/current)							x				self report	age, sex, weight, log fasting insulin, log2hr glucose, NEFA AUC, Gly482Ser, PAEE, PAEExGly4825Ser	x	x		x
24	152		2003	Franks	PGC-1␣ Genotype Modifies the Association of Volitional Energy Expenditure with V˙ O2max	cross-sectional	UK		MRC ELY	1990-1992 1994-1997			To explore whether a candidate polymorphism in the PGC-1␣ gene modifies the association between physical activity energy expenditure (PAEE) and predicted V˙ O2max (V˙ O2max.pred).	599	An initial sampling frame was constructed from all individuals aged 3040 years on 1 June 1994 who were registered with a large general practice in Ely, Cambridgeshire. One in ten random sampling was used to construct a sample of 365 individuals who were approached by letter co-signed by the subject’s general practitioner and the study co-ordinator. This followed a local media campaign and a publi…	Individuals age 40-65 registered at a large general practice in Ely, Cambridgeshire	NR	NR	NA	adults aged 40-65	40-65	0.57	VO2max (l/min)		cycle	submaximal	NR	NR	individual, breath analydrd (at each (3xin 5 min).		weight (kg)				x							Height and weight were measured in light clothing.	age, sex, smoking, log fasting insulin, log2hr glucose, NEFA AUC, Gly482Ser, PAEE, PAEExGly4825Ser	x	x
24	153		2003	Franks	PGC-1␣ Genotype Modifies the Association of Volitional Energy Expenditure with V˙ O2max	cross-sectional	UK		MRC ELY	1990-1992 1994-1997			To explore whether a candidate polymorphism in the PGC-1␣ gene modifies the association between physical activity energy expenditure (PAEE) and predicted V˙ O2max (V˙ O2max.pred).	599	An initial sampling frame was constructed from all individuals aged 3040 years on 1 June 1994 who were registered with a large general practice in Ely, Cambridgeshire. One in ten random sampling was used to construct a sample of 365 individuals who were approached by letter co-signed by the subject’s general practitioner and the study co-ordinator. This followed a local media campaign and a publi…	Individuals age 40-65 registered at a large general practice in Ely, Cambridgeshire	NR	NR	NA	adults aged 40-65	40-65	0.57	VO2max (l/min)		cycle	submaximal	NR	NR	individual, breath analydrd (at each (3xin 5 min).		log fasting insulin (pmol/L)									x		Glucose, insulin, and nonesterified fatty acid (NEFA) levels were assessed using standard techniques before and during a 75-g oral glucose tolerance test (22,30,31).	age, sex, smoking, weight, log2hr glucose, NEFA AUC, Gly482Ser, PAEE, PAEExGly4825Ser	x	x		x
24	154		2003	Franks	PGC-1␣ Genotype Modifies the Association of Volitional Energy Expenditure with V˙ O2max	cross-sectional	UK		MRC ELY	1990-1992 1994-1997			To explore whether a candidate polymorphism in the PGC-1␣ gene modifies the association between physical activity energy expenditure (PAEE) and predicted V˙ O2max (V˙ O2max.pred).	599	An initial sampling frame was constructed from all individuals aged 3040 years on 1 June 1994 who were registered with a large general practice in Ely, Cambridgeshire. One in ten random sampling was used to construct a sample of 365 individuals who were approached by letter co-signed by the subject’s general practitioner and the study co-ordinator. This followed a local media campaign and a publi…	Individuals age 40-65 registered at a large general practice in Ely, Cambridgeshire	NR	NR	NA	adults aged 40-65	40-65	0.57	VO2max (l/min)		cycle	submaximal	NR	NR	individual, breath analydrd (at each (3xin 5 min).		log 2 hr glucose (mmol/L)									x		Glucose, insulin, and nonesterified fatty acid (NEFA) levels were assessed using standard techniques before and during a 75-g oral glucose tolerance test (22,30,31).	age, sex, smoking, weight, log fasting insulin, NEFA AUC, Gly482Ser, PAEE, PAEExGly4825Ser	x	x		x
24	155		2003	Franks	PGC-1␣ Genotype Modifies the Association of Volitional Energy Expenditure with V˙ O2max	cross-sectional	UK		MRC ELY	1990-1992 1994-1997			To explore whether a candidate polymorphism in the PGC-1␣ gene modifies the association between physical activity energy expenditure (PAEE) and predicted V˙ O2max (V˙ O2max.pred).	599	An initial sampling frame was constructed from all individuals aged 3040 years on 1 June 1994 who were registered with a large general practice in Ely, Cambridgeshire. One in ten random sampling was used to construct a sample of 365 individuals who were approached by letter co-signed by the subject’s general practitioner and the study co-ordinator. This followed a local media campaign and a publi…	Individuals age 40-65 registered at a large general practice in Ely, Cambridgeshire	NR	NR	NA	adults aged 40-65	40-65	0.57	VO2max (l/min)		cycle	submaximal	NR	NR	individual, breath analydrd (at each (3xin 5 min).		NEFA AUC (mmol/L/Hr)									x		Glucose, insulin, and nonesterified fatty acid (NEFA) levels were assessed using standard techniques before and during a 75-g oral glucose tolerance test (22,30,31).	age, sex, smoking, weight, log fasting insulin, log2hr glucose, Gly482Ser, PAEE, PAEExGly4825Ser	x	x		x
24	156		2003	Franks	PGC-1␣ Genotype Modifies the Association of Volitional Energy Expenditure with V˙ O2max	cross-sectional	UK		MRC ELY	1990-1992 1994-1997			To explore whether a candidate polymorphism in the PGC-1␣ gene modifies the association between physical activity energy expenditure (PAEE) and predicted V˙ O2max (V˙ O2max.pred).	599	An initial sampling frame was constructed from all individuals aged 3040 years on 1 June 1994 who were registered with a large general practice in Ely, Cambridgeshire. One in ten random sampling was used to construct a sample of 365 individuals who were approached by letter co-signed by the subject’s general practitioner and the study co-ordinator. This followed a local media campaign and a publi…	Individuals age 40-65 registered at a large general practice in Ely, Cambridgeshire	NR	NR	NA	adults aged 40-65	40-65	0.57	VO2max (l/min)		cycle	submaximal	NR	NR	individual, breath analydrd (at each (3xin 5 min).		Gly482Ser (SS v GG+GS)									x		DNA was extracted from blood samples using standard protocols (16). PGC-1␣ sequence NM_01326 was obtained from locuslink (http://www.ncbi.nlm.nih.gov/LocusLink). In summary, genomic DNA from participants was randomly preamplified in a 50 ␮L PEP (primer extension preamplification) reaction using methods previously described (36). The PEP amplified DNA samples were PCR amplified in 8-␮L reactions w…	age, sex, smoking, weight, log fasting insulin, log2hr glucose, NEFA AUC, PAEE, PAEExGly4825Ser	x	x		x
24	157		2003	Franks	PGC-1␣ Genotype Modifies the Association of Volitional Energy Expenditure with V˙ O2max	cross-sectional	UK		MRC ELY	1990-1992 1994-1997			To explore whether a candidate polymorphism in the PGC-1␣ gene modifies the association between physical activity energy expenditure (PAEE) and predicted V˙ O2max (V˙ O2max.pred).	599	An initial sampling frame was constructed from all individuals aged 3040 years on 1 June 1994 who were registered with a large general practice in Ely, Cambridgeshire. One in ten random sampling was used to construct a sample of 365 individuals who were approached by letter co-signed by the subject’s general practitioner and the study co-ordinator. This followed a local media campaign and a publi…	Individuals age 40-65 registered at a large general practice in Ely, Cambridgeshire	NR	NR	NA	adults aged 40-65	40-65	0.57	VO2max (l/min)		cycle	submaximal	NR	NR	individual, breath analydrd (at each (3xin 5 min).		PAEE (TEE/BMR)						x					In this study, we made assessments of PAEE by undertaking individual calibration of heart rate against energy expenditure at rest and during exercise, combining this with continuous heart rate monitoring during4dof free-living (HR flex). This method has previously been validated against whole-body calorimetry and doubly labeled water (6,21), and has proven to be highly reliable (31). The availabi…	age, sex, smoking, weight, log fasting insulin, log2hr glucose, NEFA AUC, Gly482Ser, PAEExGly4825Ser	x	x		x
24	158		2003	Franks	PGC-1␣ Genotype Modifies the Association of Volitional Energy Expenditure with V˙ O2max	cross-sectional	UK		MRC ELY	1990-1992 1994-1997			To explore whether a candidate polymorphism in the PGC-1␣ gene modifies the association between physical activity energy expenditure (PAEE) and predicted V˙ O2max (V˙ O2max.pred).	599	An initial sampling frame was constructed from all individuals aged 3040 years on 1 June 1994 who were registered with a large general practice in Ely, Cambridgeshire. One in ten random sampling was used to construct a sample of 365 individuals who were approached by letter co-signed by the subject’s general practitioner and the study co-ordinator. This followed a local media campaign and a publi…	Individuals age 40-65 registered at a large general practice in Ely, Cambridgeshire	NR	NR	NA	adults aged 40-65	40-65	0.57	VO2max (l/min)		cycle	submaximal	NR	NR	individual, breath analydrd (at each (3xin 5 min).		PAEExGly482Ser										x	interaction term	age, sex, smoking, weight, log fasting insulin, log2hr glucose, NEFA AUC, Gly482Ser, PAEE,	x	x		x
25	159	x	2010	Gläser_1	Association of circulating IGF-I and IGFBP-3 concentrations and exercise capacity in healthy volunteers: Results of the Study of Health in Pomerania	cross-sectional	Germany	EU	SHIP-1	2003-2006	Low	0.848837	Therefore, themajor aim ofthepresent studywas to further clarify thepossible associationofIGFI and IGFBP-3 concentrations on exercise capacity and maximumpower output in a healthy adult general population based on a large scale population based survey – the SHIP investigation. Since exercise capacity and muscular endurance is reliably reflected by the highest reachable oxygenuptakeduring incremen…	1332	sample was selected from the population registration offices, where all German inhabitants are registered. A two-stage cluster sampling method was adopted from the WHOMONICA Project Augsburg, Germany [20]. A representative sample was drawn, comprised of 7008 adults, ages 20 to 79 years with 292 persons of each gender in each of the twelve 5-year age strata.	ages 20 to 79 years with 292 persons of each gender in each of the twelve 5-year age strata.	Subjects with missing data for IGF-I, IGFBP-3 or considered CPET parameters (n=47) were excluded. Furthermore of these 1661 subjects, 274 subjects were excluded due to the presence of at least one of the following conditions (overlaps exist): bronchial asthma (n=42), chronic obstructive bronchitis (n=74), pulmonary diseases (n=60), emphysema (n=117), cardiac pacemaker (n=6), or stenosis as well a…	0.69	NA	Residents of Peomerania aged 20-79	20-79	0.51	VO2max (ml/min)	x	cycle	maximal	NR	Subjects with the following criteria were excluded from the present study: past myocardial infarction, signs of ischaemia/ infarction, right or left bundle branch block or WolffParkinson-White syndrome in the ECG; the presence of a cardiac pacemaker, stenosis or insufficiency of the cardiac valves, systolic and diastolic failures or a cardiac shunt vitium found in the echocardiography; pulmonary …	modified Jones protokol breeath by breath analyses	x	IGF-I (ng/ml)									x		Nonfasting blood samples were drawn from the cubital vein in the supine position. The samples were analyzed immediately or stored at 80 C for IGF-I and IGFBP-3 analyses. IGF-I and IGFBP-3 levels were measured using a chemiluminescent immunometric assay on an Immulite 2500 analyzer (Siemens Immulite 2500; Siemens Healthcare Medical Diagnostics, Bad Nauheim, Germany). The assays were performed acco…	age (y), weight (kg), height (cm), physical activity (h/wk), smoking (never/former/current), and time between core examination and exercise testing.	x			x		x
25	160		2010	Gläser_1	Association of circulating IGF-I and IGFBP-3 concentrations and exercise capacity in healthy volunteers: Results of the Study of Health in Pomerania	cross-sectional	Germany		SHIP-1	2003-2006			Therefore, themajor aim ofthepresent studywas to further clarify thepossible associationofIGFI and IGFBP-3 concentrations on exercise capacity and maximumpower output in a healthy adult general population based on a large scale population based survey – the SHIP investigation. Since exercise capacity and muscular endurance is reliably reflected by the highest reachable oxygenuptakeduring incremen…	1332	sample was selected from the population registration offices, where all German inhabitants are registered. A two-stage cluster sampling method was adopted from the WHOMONICA Project Augsburg, Germany [20]. A representative sample was drawn, comprised of 7008 adults, ages 20 to 79 years with 292 persons of each gender in each of the twelve 5-year age strata.	ages 20 to 79 years with 292 persons of each gender in each of the twelve 5-year age strata.	Subjects with missing data for IGF-I, IGFBP-3 or considered CPET parameters (n=47) were excluded. Furthermore of these 1661 subjects, 274 subjects were excluded due to the presence of at least one of the following conditions (overlaps exist): bronchial asthma (n=42), chronic obstructive bronchitis (n=74), pulmonary diseases (n=60), emphysema (n=117), cardiac pacemaker (n=6), or stenosis as well a…	0.69	NA	Residents of Peomerania aged 20-79	20-79	0.51	VO2max (ml/min)		cycle	maximal	NR	Subjects with the following criteria were excluded from the present study: past myocardial infarction, signs of ischaemia/ infarction, right or left bundle branch block or WolffParkinson-White syndrome in the ECG; the presence of a cardiac pacemaker, stenosis or insufficiency of the cardiac valves, systolic and diastolic failures or a cardiac shunt vitium found in the echocardiography; pulmonary …	modified Jones protokol breeath by breath analyses		IGFBP-3 (ng/ml)									x		Nonfasting blood samples were drawn from the cubital vein in the supine position. The samples were analyzed immediately or stored at 80 C for IGF-I and IGFBP-3 analyses. IGF-I and IGFBP-3 levels were measured using a chemiluminescent immunometric assay on an Immulite 2500 analyzer (Siemens Immulite 2500; Siemens Healthcare Medical Diagnostics, Bad Nauheim, Germany). The assays were performed acco…	age (y), weight (kg), height (cm), physical activity (h/wk), smoking (never/former/current), and time between core examination and exercise testing.	x			x		x
25	161		2010	Gläser_1	Association of circulating IGF-I and IGFBP-3 concentrations and exercise capacity in healthy volunteers: Results of the Study of Health in Pomerania	cross-sectional	Germany		SHIP-1	2003-2006			Therefore, themajor aim ofthepresent studywas to further clarify thepossible associationofIGFI and IGFBP-3 concentrations on exercise capacity and maximumpower output in a healthy adult general population based on a large scale population based survey – the SHIP investigation. Since exercise capacity and muscular endurance is reliably reflected by the highest reachable oxygenuptakeduring incremen…	1332	sample was selected from the population registration offices, where all German inhabitants are registered. A two-stage cluster sampling method was adopted from the WHOMONICA Project Augsburg, Germany [20]. A representative sample was drawn, comprised of 7008 adults, ages 20 to 79 years with 292 persons of each gender in each of the twelve 5-year age strata.	ages 20 to 79 years with 292 persons of each gender in each of the twelve 5-year age strata.	Subjects with missing data for IGF-I, IGFBP-3 or considered CPET parameters (n=47) were excluded. Furthermore of these 1661 subjects, 274 subjects were excluded due to the presence of at least one of the following conditions (overlaps exist): bronchial asthma (n=42), chronic obstructive bronchitis (n=74), pulmonary diseases (n=60), emphysema (n=117), cardiac pacemaker (n=6), or stenosis as well a…	0.69	NA	Residents of Peomerania aged 20-79	20-79	0.51	VO2max (ml/min)		cycle	maximal	NR	Subjects with the following criteria were excluded from the present study: past myocardial infarction, signs of ischaemia/ infarction, right or left bundle branch block or WolffParkinson-White syndrome in the ECG; the presence of a cardiac pacemaker, stenosis or insufficiency of the cardiac valves, systolic and diastolic failures or a cardiac shunt vitium found in the echocardiography; pulmonary …	modified Jones protokol breeath by breath analyses		Ratio									x		Nonfasting blood samples were drawn from the cubital vein in the supine position. The samples were analyzed immediately or stored at 80 C for IGF-I and IGFBP-3 analyses. IGF-I and IGFBP-3 levels were measured using a chemiluminescent immunometric assay on an Immulite 2500 analyzer (Siemens Immulite 2500; Siemens Healthcare Medical Diagnostics, Bad Nauheim, Germany). The assays were performed acco…	age (y), weight (kg), height (cm), physical activity (h/wk), smoking (never/former/current), and time between core examination and exercise testing.	x			x		x
26	162	x	2011	Gläser_2	Peripheral endothelial dysfunction is associated with gas exchange inefficiency in smokers	cross-sectional	Germany	EU	SHIP-1	2003-2006	Low	0.790698	aimed to assess the potential link between peripheral endothelial function and gas exchange in a large-scale population-based study called the Study of Health in Pomerania (SHIP). The major hypothesis tested was that FMD is related to exercise capacity and ventilatory efficiency in a sample representing a wide age range of the general population.	1416	sample was selected from the population registration offices, where all German inhabitants are registered. A two-stage cluster sampling method was adopted from the WHOMONICA Project Augsburg, Germany [20]. A representative sample was drawn, comprised of 7008 adults, ages 20 to 79 years with 292 persons of each gender in each of the twelve 5-year age strata. Between March 2002 and September 2006, …	ages 20 to 79 years with 292 persons of each gender in each of the twelve 5-year age strata. Antihypotensives, antihypertensives, peripheral vasodilators, beta-blockers, calcium channel blockers, drugs acting on the reninangiotensin system, statins, bronchodilators and nonsteroidal anti-inflammatory drugs (oral or inhaled), which could act as confounders, were included in the analyses.	past myocardial infarction, echocardiographic evidence of ventricular dysfunction or valvular disease, electrocardiographic signs of ischaemia, neuromuscular or musculoskeletal disorders based on neurological examination, malignancies, pulmonary diseases, chronic obstructive bronchitis, bronchial asthma, drugs against obstructive airway disease including inhaled steroids [(ATC) code R03], arteria…	0.69	NA	sample representing a wide age range of the general populatoin	20-79	0.5	VE v.VCO2 slope	x	cycle	maximal	NR	Subjects with the following criteria were excluded from the present study: past myocardial infarction, signs of ischaemia/ infarction, right or left bundle branch block or WolffParkinson-White syndrome in the ECG; the presence of a cardiac pacemaker, stenosis or insufficiency of the cardiac valves, systolic and diastolic failures or a cardiac shunt vitium found in the echocardiography; pulmonary …	modified Jones protokol breeath by breath analyses	x	nitroglycerin-mediated dilation (NMD)							x			x	NMD was taken 3 min after sublingual administration of nitroglycerin (400 μg) in 1096 subjects	†Age to CPET, endothelial function determination and baseline brachial artery diameter (mm), height (cm) and weight (kg).	x			x
26	163		2011	Gläser_2	Peripheral endothelial dysfunction is associated with gas exchange inefficiency in smokers	cross-sectional	Germany		SHIP-1	2003-2006			aimed to assess the potential link between peripheral endothelial function and gas exchange in a large-scale population-based study called the Study of Health in Pomerania (SHIP). The major hypothesis tested was that FMD is related to exercise capacity and ventilatory efficiency in a sample representing a wide age range of the general population.	1416	sample was selected from the population registration offices, where all German inhabitants are registered. A two-stage cluster sampling method was adopted from the WHOMONICA Project Augsburg, Germany [20]. A representative sample was drawn, comprised of 7008 adults, ages 20 to 79 years with 292 persons of each gender in each of the twelve 5-year age strata.	ages 20 to 79 years with 292 persons of each gender in each of the twelve 5-year age strata. Antihypotensives, antihypertensives, peripheral vasodilators, beta-blockers, calcium channel blockers, drugs acting on the reninangiotensin system, statins, bronchodilators and nonsteroidal anti-inflammatory drugs (oral or inhaled), which could act as confounders, were included in the analyses.	past myocardial infarction, echocardiographic evidence of ventricular dysfunction or valvular disease, electrocardiographic signs of ischaemia, neuromuscular or musculoskeletal disorders based on neurological examination, malignancies, pulmonary diseases, chronic obstructive bronchitis, bronchial asthma, drugs against obstructive airway disease including inhaled steroids [(ATC) code R03], arteria…	0.69	NA	sample representing a wide age range of the general populatoin	20-79	0.5	VE v.VCO2 slope		cycle	maximal	NR	Subjects with the following criteria were excluded from the present study: past myocardial infarction, signs of ischaemia/ infarction, right or left bundle branch block or WolffParkinson-White syndrome in the ECG; the presence of a cardiac pacemaker, stenosis or insufficiency of the cardiac valves, systolic and diastolic failures or a cardiac shunt vitium found in the echocardiography; pulmonary …	modified Jones protokol breeath by breath analyses		flow-mediated dilation (assessed as post-occlusion brachial artery diameter corrected for baseline diameter) (FMD)							x			x	were performed in a supine position by two observers. The subject’s right arm was comfortably immobilised, and the brachial artery diameter was recorded 3-7 cm above the antecubital fossa using a 10-MHz linear array transducer ultrasound system (Cypress, Siemens AG, Erlangen, Germany). After the resting scan, a pneumatic cuff placed around the forearm 10 cm distal to the ultrasound location was i…	†Age to CPET, endothelial function determination and baseline brachial artery diameter (mm), height (cm) and weight (kg).	x			x
27	164	x	2013	Grigaliuniene	Cardiorespiratory Parameters of Exercise Capacity in a Healthy Lithuanian Population: The Pilot Study	cross-sectional	Lithuania	EU	NA	NR	High	0.372093	The purpose of the present study was: (i) to determine the main cardiorespiratory fitness parameters for healthy adults living in Lithuania; (ii) to compare our results with the reference normative values estimated for other foreign populations; (iii) to describe the dynamics of cardiorespiratory fitness parameters with advancing age.	168	Subjects were randomly chosen from the general public living in the city of Vilnius. The population was divided into five main groups according to their age as recorded on the day of exercise testing: 20-29, 30-39, 40-49, and 50-59 years.	currently healthy, non-smoking	not receiving medical therapy that could possibly affect cardiorespiratory function, without a chronic disease or any orthopaedic problems that would not allow them to complete the exercise testing protocol. Baseline resting blood pressure was required to be below 140/90 mmHg. Professional athletes were not included in the study.	NR	NA	healthy adults aged from 20 to 60 years who were randomly selected from the general population.	20-60	0.46	VO2max (l/min)	x	cycle	maximal	NR	NR	individual (?), breath-by-breath analyses	x	Age	x										self report	NA
28	165	x	2005	Gulati	The Prognostic Value of a Nomogram for Exercise Capacity in Women	cross-sectional	US	NoA	St. James Women Take Heart Project	1992	Medium	0.55814	The first was to create a simple nomogram for women to allow the conversion of the MET value achieved on a stress test into a percentage of the predicted exercise capacity for any age, on the basis of findings in a population of asymptomatic women. The second goal was to assess the usefulness of the nomogram in predicting survival among both asymptomatic women and a referral population of women w…	5721	volunteers were solicited from the Chicago metropolitan area to participate in a study of heart disease in women.	Inclusion criteria for the study cohort were an age of at least 35 years and the ability to walk on a treadmill at a moderate pace.	Women were excluded if they were pregnant, had typical anginal symptoms or any history of cardiac disease (including previous myocardial infarction, documented coro-nary artery disease, heart failure, or valvular heart disease), weighed more than 148 kg (325 lb), had a baseline blood pressure of 170/110 mm Hg or higher, or had incomplete data concerning cardiac risk factors.	NR	NR	asymptomatic women	35-86	1	METS	.	treadmill	maximal	NR	NR	Bruce protocol	.	age	x										self report	PA						x
29	166	x	1998	Habedank	Ventilatory efficiency and exercise tolerance in 101 healthy volunteers	cross-sectional	Germany	EU	NA	NR	Medium	0.511628	The aim of our study was to acquire normal values for ventilatory eciency and to establish correlations with age and sex.	101	volunteer participants	All the subjects were free of cardiovascular or pulmonary disease, were normal on physical examination, and during pulmonary function tests, and had normal rest and exercise electrocardiograms.	NR	NR	NA	healthy volunteers aged 16-75	16-75	0.44	Ventilatory efficiency (VE v. VCO2)	x	treadmill	maximal	NR	NR	individual (?), breath-by-breath analyses	x	age	x										self report	sex		x
30	167	x	2011	Hakola	Cardiorespiratory fitness in aging men and women: the DR’s EXTRA study	cross-sectional	Finland	EU	DR's EXTRA	2005-2006	Medium	0.697674	The aim of the study was to describe the levels and to create reference values of cardiorespiratory fitness, expressed as maximal oxygen consumption (VO2max), maximal metabolic equivalents (METs) and maximal workload in aging men and women.	1349	randomly selected from the national population register	55–74 years of age in 2002, when they were randomly selected from the national population register	24 Death 12 Cardiovascular disease 12 Cancer 48 Other disease 103 Loss of motivation 38 Moved elsewhere 20 Personal reasons 87 Unknown reasons 6 Unreachable	0.77	NA	representative sample of 3000 individuals (1500 men, 1500 women) who lived in the city of Kuopio in Finland and who were 55–74 years of age in 2002,	55-74	0.5	VO2max (l/min)	.	cycle	maximal	NR	40 No respiratory gas analysis 5 Technical problem 9 Submaximal test 2 Cardiovascular disease 5 Other disease	individual (?), breath-by-breath analyses	x	smoking							x				self report	NR
30	168		2011	Hakola	Cardiorespiratory fitness in aging men and women: the DR’s EXTRA study	cross-sectional	Finland		DR's EXTRA	2005-2006			The aim of the study was to describe the levels and to create reference values of cardiorespiratory fitness, expressed as maximal oxygen consumption (VO2max), maximal metabolic equivalents (METs) and maximal workload in aging men and women.	1349	randomly selected from the national population register	55–74 years of age in 2002, when they were randomly selected from the national population register	24 Death 12 Cardiovascular disease 12 Cancer 48 Other disease 103 Loss of motivation 38 Moved elsewhere 20 Personal reasons 87 Unknown reasons 6 Unreachable	0.77	NA	representative sample of 3000 individuals (1500 men, 1500 women) who lived in the city of Kuopio in Finland and who were 55–74 years of age in 2002,	55-74	0.5	VO2max (l/min)		cycle	maximal	NR	0 No respiratory gas analysis 5 Technical problem 9 Submaximal test 2 Cardiovascular disease 5 Other disease			Beta blocker use										x	self report	NR
30	169		2011	Hakola	Cardiorespiratory fitness in aging men and women: the DR’s EXTRA study	cross-sectional	Finland		DR's EXTRA	2005-2006			The aim of the study was to describe the levels and to create reference values of cardiorespiratory fitness, expressed as maximal oxygen consumption (VO2max), maximal metabolic equivalents (METs) and maximal workload in aging men and women.	1349	randomly selected from the national population register	55–74 years of age in 2002, when they were randomly selected from the national population register	24 Death 12 Cardiovascular disease 12 Cancer 48 Other disease 103 Loss of motivation 38 Moved elsewhere 20 Personal reasons 87 Unknown reasons 6 Unreachable	0.77	NA	representative sample of 3000 individuals (1500 men, 1500 women) who lived in the city of Kuopio in Finland and who were 55–74 years of age in 2002,	55-74	0.5	VO2max (l/min)		cycle	maximal	NR	0 No respiratory gas analysis 5 Technical problem 9 Submaximal test 2 Cardiovascular disease 5 Other disease			Beta blocker use				x							self report	NR
30	170		2011	Hakola	Cardiorespiratory fitness in aging men and women: the DR’s EXTRA study	cross-sectional	Finland		DR's EXTRA	2005-2006			The aim of the study was to describe the levels and to create reference values of cardiorespiratory fitness, expressed as maximal oxygen consumption (VO2max), maximal metabolic equivalents (METs) and maximal workload in aging men and women.	1349	randomly selected from the national population register	55–74 years of age in 2002, when they were randomly selected from the national population register	24 Death 12 Cardiovascular disease 12 Cancer 48 Other disease 103 Loss of motivation 38 Moved elsewhere 20 Personal reasons 87 Unknown reasons 6 Unreachable	0.77	NA	representative sample of 3000 individuals (1500 men, 1500 women) who lived in the city of Kuopio in Finland and who were 55–74 years of age in 2002,	55-74	0.5	VO2max (l/min)		cycle	maximal	NR	0 No respiratory gas analysis 5 Technical problem 9 Submaximal test 2 Cardiovascular disease 5 Other disease			MVPA						x					self report	NR
31	171	x	2004	Hancox	Association between child and adolescent television viewing and adult health: a longitudinal birth cohort study	longitudinal	New Zealand	OC	Dundein birth cohort	1975-1976 to 2001-2002	Low	0.733333	examined the association between child and adolescent television viewing and a range of adult health indicators in a birth cohort of approximately 1000 New Zealanders.	785	birth cohort Dunedin NZ	indviduals born in Dunedin, New Zealand between April 1972and March 1973	pregnancy	0.91	0.05	Individuals born in Dunedin, NZ between April 972 and March 1973	5-15/26	NR	VO2max (l/min)	.	cycle	submaximal	NR	NR		.	Childhood viewing (5-11, mean hrs per weekday)										x	parental report	sex, body weight(kg)		x		x
31	172		2004	Hancox	Association between child and adolescent television viewing and adult health: a longitudinal birth cohort study	longitudinal	New Zealand		Dundein birth cohort	1975-1976 to 2001-2002			examined the association between child and adolescent television viewing and a range of adult health indicators in a birth cohort of approximately 1000 New Zealanders.	785	birth cohort Dunedin NZ	indviduals born in Dunedin, New Zealand between April 1972and March 1973	pregnancy	0.91	0.05	Individuals born in Dunedin, NZ between April 972 and March 1973	5-15/26	NR	VO2max (l/min)		cycle	submaximal	NR	NR			viewing during adolescence (13-15, mean hours per day including weekends)										x	self report	sex, body weight (kg)		x		x
31	173		2004	Hancox	Association between child and adolescent television viewing and adult health: a longitudinal birth cohort study	longitudinal	New Zealand		Dundein birth cohort	1975-1976 to 2001-2002			examined the association between child and adolescent television viewing and a range of adult health indicators in a birth cohort of approximately 1000 New Zealanders.	785	birth cohort Dunedin NZ	indviduals born in Dunedin, New Zealand between April 1972and March 1973	pregnancy	0.91	0.05	Individuals born in Dunedin, NZ between April 972 and March 1973	5-15/26	NR	VO2max (l/min)		cycle	submaximal	NR	NR			viewing in early adulthood 21 (mean hours per day incuding weekends(										x	self report	sex, age, bodyweight, childhood SES and PA at age 15	x	x		x	x	X
32	174	x	2017	Hawari	The effect of habitual waterpipe tobacco smoking on pulmonary function and exercise capacity in young healthy males: A pilot study	cross-sectional	Jordan	AS	NA	NR	Medium	0.581395	we compared habitual waterpipe smokers (WPS) to non-users of tobacco (non-smokers) in three areas: burden of respiratory symptoms, lung function, and cardiopulmonary exercise capacity. We anticipated that WPS would fare worse than nonsmokers across all measures	138	Participants were recruited through announcements made within several universities in Jordan. Initial contact and screening were conducted via phone.	All males who reported being healthy and between the ages of 18 and 26, and who reported either never using tobacco or being WPS who smoked three or more times a week for the past three years atleast (with no other form of tobacco used) were invited to join the study.	body-mass index (BMI) of40.0 kg/m2 or more; active chronic medical conditions; use of chronic prescription medications; illicit drug use; abnormal heart rhythm or abnormal resting heart rate; (>100 or < 50 beats per minute); high blood pressure (>140/90 mmHg); or low oxygen (O2) saturation (<95%).	NR	NR	healthy men between the ages of 18-26 from universities in Jordan	18-26	0	Exercise test duration (min)	.	cycle	NR	NR	NR		x	age (y)	x										self report	BMI, regular exercise, waterpipe use, shortness of breath upon exertion				x		x
32	175		2017	Hawari	The effect of habitual waterpipe tobacco smoking on pulmonary function and exercise capacity in young healthy males: A pilot study	cross-sectional	Jordan		NA	NR			we compared habitual waterpipe smokers (WPS) to non-users of tobacco (non-smokers) in three areas: burden of respiratory symptoms, lung function, and cardiopulmonary exercise capacity. We anticipated that WPS would fare worse than nonsmokers across all measures	138	Participants were recruited through announcements made within several universities in Jordan. Initial contact and screening were conducted via phone.	All males who reported being healthy and between the ages of 18 and 26, and who reported either never using tobacco or being WPS who smoked three or more times a week for the past three years atleast (with no other form of tobacco used) were invited to join the study.	body-mass index (BMI) of40.0 kg/m2 or more; active chronic medical conditions; use of chronic prescription medications; illicit drug use; abnormal heart rhythm or abnormal resting heart rate; (>100 or < 50 beats per minute); high blood pressure (>140/90 mmHg); or low oxygen (O2) saturation (<95%).	NR	NR	healthy men between the ages of 18-26 from universities in Jordan	18-26	0	Exercise test duration (min)		cycle	NR	NR	NR			BMI (kg/m2)				x							clinical measurement	age, regular exercise, waterpipe use, shortness of breath upon exertion	x					x
32	176		2017	Hawari	The effect of habitual waterpipe tobacco smoking on pulmonary function and exercise capacity in young healthy males: A pilot study	cross-sectional	Jordan		NA	NR			we compared habitual waterpipe smokers (WPS) to non-users of tobacco (non-smokers) in three areas: burden of respiratory symptoms, lung function, and cardiopulmonary exercise capacity. We anticipated that WPS would fare worse than nonsmokers across all measures	138	Participants were recruited through announcements made within several universities in Jordan. Initial contact and screening were conducted via phone.	All males who reported being healthy and between the ages of 18 and 26, and who reported either never using tobacco or being WPS who smoked three or more times a week for the past three years atleast (with no other form of tobacco used) were invited to join the study.	body-mass index (BMI) of40.0 kg/m2 or more; active chronic medical conditions; use of chronic prescription medications; illicit drug use; abnormal heart rhythm or abnormal resting heart rate; (>100 or < 50 beats per minute); high blood pressure (>140/90 mmHg); or low oxygen (O2) saturation (<95%).	NR	NR	healthy men between the ages of 18-26 from universities in Jordan	18-26	0	Exercise test duration (min)		cycle	NR	NR	NR			regular exercise						x					self report	age, BMI,waterpipe use, shortness of breath upon exertion	x			x		x
32	177		2017	Hawari	The effect of habitual waterpipe tobacco smoking on pulmonary function and exercise capacity in young healthy males: A pilot study	cross-sectional	Jordan		NA	NR			we compared habitual waterpipe smokers (WPS) to non-users of tobacco (non-smokers) in three areas: burden of respiratory symptoms, lung function, and cardiopulmonary exercise capacity. We anticipated that WPS would fare worse than nonsmokers across all measures	138	Participants were recruited through announcements made within several universities in Jordan. Initial contact and screening were conducted via phone.	All males who reported being healthy and between the ages of 18 and 26, and who reported either never using tobacco or being WPS who smoked three or more times a week for the past three years atleast (with no other form of tobacco used) were invited to join the study.	body-mass index (BMI) of40.0 kg/m2 or more; active chronic medical conditions; use of chronic prescription medications; illicit drug use; abnormal heart rhythm or abnormal resting heart rate; (>100 or < 50 beats per minute); high blood pressure (>140/90 mmHg); or low oxygen (O2) saturation (<95%).	NR	NR	healthy men between the ages of 18-26 from universities in Jordan	18-26	0	Exercise test duration (min)		cycle	NR	NR	NR			waterpipe use							x				self report	age, BMI,regular exercise, shortness of breath upon exertion	x			x		x
32	178		2017	Hawari	The effect of habitual waterpipe tobacco smoking on pulmonary function and exercise capacity in young healthy males: A pilot study	cross-sectional	Jordan		NA	NR			we compared habitual waterpipe smokers (WPS) to non-users of tobacco (non-smokers) in three areas: burden of respiratory symptoms, lung function, and cardiopulmonary exercise capacity. We anticipated that WPS would fare worse than nonsmokers across all measures	138	Participants were recruited through announcements made within several universities in Jordan. Initial contact and screening were conducted via phone.	All males who reported being healthy and between the ages of 18 and 26, and who reported either never using tobacco or being WPS who smoked three or more times a week for the past three years atleast (with no other form of tobacco used) were invited to join the study.	body-mass index (BMI) of40.0 kg/m2 or more; active chronic medical conditions; use of chronic prescription medications; illicit drug use; abnormal heart rhythm or abnormal resting heart rate; (>100 or < 50 beats per minute); high blood pressure (>140/90 mmHg); or low oxygen (O2) saturation (<95%).	NR	NR	healthy men between the ages of 18-26 from universities in Jordan	18-26	0	Exercise test duration (min)		cycle	NR	NR	NR			shortness of breath upon exertion										x	American Thoracic Society and the Division of Lung Diseases (ATS-DLD-78) adult questionnaire	age, BMI,regular exercise,waterpipe use	x			x		x
33	179	x	1995	Heil	nonexercise regression models to estimate peak oxygen comsumption	cross-sectional	US	NoA	NA	NR	Medium	0.534884	determine if more accurante N-EX models could be developed for predicting Vo2max than currently accepted modelts. Principles of regression model validation and cross validation were used to derive N-EX VO2peak predictive models in a relatively equal numbers of males and females between ages of 20-79 with Vo2peak heterogeneity	374	apparently healthy volunteers recruited from the Amhers and Worcester, MA communities	NR	cardiovascular and orthopedic contraindications to brisk walking. Medications known to affect heart rate and blood pressure responses to exercise were excluded	NA	NA	apparently healthy volunteers aged 20-79	20-79	0.52	VO2max (ml/kg/min)	.	treadmill	maximal	NR	NR		x	% body fat				x							Siri equation	activity, age, age^2, gender	x	x				x
33	180		1995	Heil	nonexercise regression models to estimate peak oxygen comsumption	cross-sectional	US		NA	NR			determine if more accurante N-EX models could be developed for predicting Vo2max than currently accepted modelts. Principles of regression model validation and cross validation were used to derive N-EX VO2peak predictive models in a relatively equal numbers of males and females between ages of 20-79 with Vo2peak heterogeneity	374	apparently healthy volunteers recruited from the Amhers and Worcester, MA communities	NR	cardiovascular and orthopedic contraindications to brisk walking. Medications known to affect heart rate and blood pressure responses to exercise were excluded	NA	NA	apparently healthy volunteers aged 20-79	20-79	0.52	VO2max (ml/kg/min)		treadmill	maximal	NR	NR			activity						x					self report, level PA in past month (0-7)	% body fat, age, age^2, gender	x	x		x
33	181		1995	Heil	nonexercise regression models to estimate peak oxygen comsumption	cross-sectional	US		NA	NR			determine if more accurante N-EX models could be developed for predicting Vo2max than currently accepted modelts. Principles of regression model validation and cross validation were used to derive N-EX VO2peak predictive models in a relatively equal numbers of males and females between ages of 20-79 with Vo2peak heterogeneity	374	apparently healthy volunteers recruited from the Amhers and Worcester, MA communities	NR	cardiovascular and orthopedic contraindications to brisk walking. Medications known to affect heart rate and blood pressure responses to exercise were excluded	NA	NA	apparently healthy volunteers aged 20-79	20-79	0.52	VO2max (ml/kg/min)		treadmill	maximal	NR	NR			Age (y)	x										sef report	% body fat, activity, age^2, gender	x	x		x		x
33	182		1995	Heil	nonexercise regression models to estimate peak oxygen comsumption	cross-sectional	US		NA	NR			determine if more accurante N-EX models could be developed for predicting Vo2max than currently accepted modelts. Principles of regression model validation and cross validation were used to derive N-EX VO2peak predictive models in a relatively equal numbers of males and females between ages of 20-79 with Vo2peak heterogeneity	374	apparently healthy volunteers recruited from the Amhers and Worcester, MA communities	NR	cardiovascular and orthopedic contraindications to brisk walking. Medications known to affect heart rate and blood pressure responses to exercise were excluded	NA	NA	apparently healthy volunteers aged 20-79	20-79	0.52	VO2max (ml/kg/min)		treadmill	maximal	NR	NR			Age^2	x										self report	% body fat, activity, age, gender	x	x		x		x
33	183		1995	Heil	nonexercise regression models to estimate peak oxygen comsumption	cross-sectional	US		NA	NR			determine if more accurante N-EX models could be developed for predicting Vo2max than currently accepted modelts. Principles of regression model validation and cross validation were used to derive N-EX VO2peak predictive models in a relatively equal numbers of males and females between ages of 20-79 with Vo2peak heterogeneity	374	apparently healthy volunteers recruited from the Amhers and Worcester, MA communities	NR	cardiovascular and orthopedic contraindications to brisk walking. Medications known to affect heart rate and blood pressure responses to exercise were excluded	NA	NA	apparently healthy volunteers aged 20-79	20-79	0.52	VO2max (ml/kg/min)		treadmill	maximal	NR	NR			Gender		x									self report	% body fat, activity, age, age^2	x	x		x		x
34	184	x	2012	Hoehner	Commuting Distance, Cardiorespiratory Fitness, and Metabolic Risk	cross-sectional	US	NoA	CCLS	2000-2007	Low	0.658537	To examine the association between commuting distance, physical activity, cardiorespiratory fıtness (CRF), and metabolic risk indicators.	4297	most recent examination ofparticipants aged 18–90 years who had a maximal treadmill test between January 2000 and June 2007. In addition, the study included employed participants with nonmissing geocodable home and work addresses in 11 counties of the Dallas–Fort Worth TX metropolitan area and Travis County in the Austin TX metropolitan area where the majority of participants resided.	adults who had a comprehensive medical examination between 2000 and 2007 and geocoded home and work addresses in 12 Texas metropolitan counties.	Participants were excluded if they reported >6 weeks of sick days in the past year, had missing data on the primary outcomes or covariates of interest, reported a personal history of heart attack, stroke, or diabetes, or were pregnant. Participants who reported home addresses as work addresses also were excluded. Subanalyses with waist circumference excluded 991 participants with missing data on …	NA	NA	adults who had a comprehensive medical examination between 2000 and 2007 and geocoded home and work addresses in 12 Texas metropolitan counties.	18-90	0.191	METS	.	treadmill	maximal	NR	NR	modified Balke protokoll	.	commuting distance: 0-5 6-10 11-15 16-20 >20										x	self report	age, gender, education, race, marital status, children in home, smoking status, alcohol intake, family history of diabetes, BMI	x	x	x	x	x	x
34	185		2012	Hoehner	Commuting Distance, Cardiorespiratory Fitness, and Metabolic Risk	cross-sectional	US		CCLS	2000-2007			To examine the association between commuting distance, physical activity, cardiorespiratory fıtness (CRF), and metabolic risk indicators.	4297	most recent examination ofparticipants aged 18–90 years who had a maximal treadmill test between January 2000 and June 2007. In addition, the study included employed participants with nonmissing geocodable home and work addresses in 11 counties of the Dallas–Fort Worth TX metropolitan area and Travis County in the Austin TX metropolitan area where the majority of participants resided.	adults who had a comprehensive medical examination between 2000 and 2007 and geocoded home and work addresses in 12 Texas metropolitan counties.	Participants were excluded if they reported >6 weeks of sick days in the past year, had missing data on the primary outcomes or covariates of interest, reported a personal history of heart attack, stroke, or diabetes, or were pregnant. Participants who reported home addresses as work addresses also were excluded. Subanalyses with waist circumference excluded 991 participants with missing data on …	NA	NA	adults who had a comprehensive medical examination between 2000 and 2007 and geocoded home and work addresses in 12 Texas metropolitan counties.	18-90	0.191	METS		treadmill	maximal	NR	NR	modified Balke protokoll		commuting distance (in miles)										x	self report	age, gender, education, race, marital status, children in home, smoking status, alcohol intake, family history of diabetes, BMI	x	x	x	x	x	x
35	186	x	1994	Inbar	normal cardiopulmonary responses during incremental exercise in 20-to 70-yr-old men	cross-sectional	Israel	AS	NA	1985-1991	Medium	0.54878	establish comprehensive set of reference values for the response of healthy men to submaximal and maximal incremental exercise challenges.	1421	patients who underwent a periodic medical exam with CPET.	normal spirometric data	abnormal ECG tracings, medical history, or physical or lab findings of cardiac, respiratory, metabolic, or neuromuscular diseases	NA	NA	healthy men	20-70	0	VO2max (l/min)	x	treadmill	maximal	normal spirometric data	abnormal ECG tracings, medical history, or physical or lab findings of cardiac, respiratory, metabolic, or neuromuscular diseases	modified Balke protokol, breath-by-breath	x	age (y)	x										self report	ht(cm), wt(kg), active (>2hr/wk), smoker (>10cigs/day), residence (urban)				x	x	x
35	187		1994	Inbar	normal cardiopulmonary responses during incremental exercise in 20-to 70-yr-old men	cross-sectional	Israel		NA	1985-1991			establish comprehensive set of reference values for the response of healthy men to submaximal and maximal incremental exercise challenges.	1421	patients who underwent a periodic medical exam with CPET.	normal spirometric data	abnormal ECG tracings, medical history, or physical or lab findings of cardiac, respiratory, metabolic, or neuromuscular diseases	NA	NA	healthy men	20-70	0	VO2max (l/min)		treadmill	maximal	normal spirometric data	abnormal ECG tracings, medical history, or physical or lab findings of cardiac, respiratory, metabolic, or neuromuscular diseases			height (cm)				x							clinical measurement	age(y), wt(kg), active (>2hr/wk), smoker (>10cigs/day), residence (urban)	x			x	x	x
35	188		1994	Inbar	normal cardiopulmonary responses during incremental exercise in 20-to 70-yr-old men	cross-sectional	Israel		NA	1985-1991			establish comprehensive set of reference values for the response of healthy men to submaximal and maximal incremental exercise challenges.	1421	patients who underwent a periodic medical exam with CPET.	normal spirometric data	abnormal ECG tracings, medical history, or physical or lab findings of cardiac, respiratory, metabolic, or neuromuscular diseases	NA	NA	healthy men	20-70	0	VO2max (l/min)		treadmill	maximal	normal spirometric data	abnormal ECG tracings, medical history, or physical or lab findings of cardiac, respiratory, metabolic, or neuromuscular diseases			weight (kg)				x							clinical measurement	age(y), ht(cm), active (>2hr/wk), smoker (>10cigs/day), residence ( urban)	x			x	x	x
35	189		1994	Inbar	normal cardiopulmonary responses during incremental exercise in 20-to 70-yr-old men	cross-sectional	Israel		NA	1985-1991			establish comprehensive set of reference values for the response of healthy men to submaximal and maximal incremental exercise challenges.	1421	patients who underwent a periodic medical exam with CPET.	normal spirometric data	abnormal ECG tracings, medical history, or physical or lab findings of cardiac, respiratory, metabolic, or neuromuscular diseases	NA	NA	healthy men	20-70	0	VO2max (l/min)		treadmill	maximal	normal spirometric data	abnormal ECG tracings, medical history, or physical or lab findings of cardiac, respiratory, metabolic, or neuromuscular diseases			active (>2hr/wk)						x					self report	age(y), ht(cm), wt(kg), smoker (>10cigs/day), residence (urban)	x			x	x
35	190		1994	Inbar	normal cardiopulmonary responses during incremental exercise in 20-to 70-yr-old men	cross-sectional	Israel		NA	1985-1991			establish comprehensive set of reference values for the response of healthy men to submaximal and maximal incremental exercise challenges.	1421	patients who underwent a periodic medical exam with CPET.	normal spirometric data	abnormal ECG tracings, medical history, or physical or lab findings of cardiac, respiratory, metabolic, or neuromuscular diseases	NA	NA	healthy men	20-70	0	VO2max (l/min)		treadmill	maximal	normal spirometric data	abnormal ECG tracings, medical history, or physical or lab findings of cardiac, respiratory, metabolic, or neuromuscular diseases			smoker (>10cigs/day)							x				self report	age(y), ht(cm), wt(kg), active (>2hr/wk), residence ( urban)	x			x	x	x
35	191		1994	Inbar	normal cardiopulmonary responses during incremental exercise in 20-to 70-yr-old men	cross-sectional	Israel		NA	1985-1991			establish comprehensive set of reference values for the response of healthy men to submaximal and maximal incremental exercise challenges.	1421	patients who underwent a periodic medical exam with CPET.	normal spirometric data	abnormal ECG tracings, medical history, or physical or lab findings of cardiac, respiratory, metabolic, or neuromuscular diseases	NA	NA	healthy men	20-70	0	VO2max (l/min)		treadmill	maximal	normal spirometric data	abnormal ECG tracings, medical history, or physical or lab findings of cardiac, respiratory, metabolic, or neuromuscular diseases			residence (urban)					x						self report	age(y), ht(cm), wt(kg), active (>2hr/wk), smoker (>10cigs/day),	x			x		x
36	192	x	2014	Ittermann	Serum thyroid-stimulating hormone levels are not associated with exercise capacity and lung function parameters in two population-based studies	cross-sectional	Germany	EU	SHIP	2002-2006, 2008-2012	Low	0.848837	investigate the association of thyroid function state as determined by serum thyroid-stimulating hormone (TSH) levels with parameters of lung function and cardiopulmonary exercise testing (CPET) in two independent population-based studies conducted in Northeast Germany.	4184	eligible subjects were randomly selected from population registries.	residence in Pomerania	NR	0.688	83.5 (SHIP0) 50.3% (SHIP trend)	population from NE Germany	20-85	0.495	forced expiratory volume in 1 sec (FEV1)	.	cycle	maximal	NR	NR		x	TSH (thyroid stimulating hormone, MIU/L)									x		Serum TSH levels were measured by immunochemiluminiscent procedures (SHIP-1: Immulite 2000, Third Generation, DPC, Los Angeles, USA; SHIP-Trend-0: Vista, Siemens, Eschborn, Germany).	age, sex, height, weight, beta blocker intake, smoking status, physical activity and time between exams	x	x	x		x	x
36	193		2014	Ittermann	Serum thyroid-stimulating hormone levels are not associated with exercise capacity and lung function parameters in two population-based studies	cross-sectional	Germany		SHIP	2002-2006, 2008-2012			investigate the association of thyroid function state as determined by serum thyroid-stimulating hormone (TSH) levels with parameters of lung function and cardiopulmonary exercise testing (CPET) in two independent population-based studies conducted in Northeast Germany.	4184	eligible subjects were randomly selected from population registries.	residence in Pomerania	NR	0.688	83.5 (SHIP0) 50.3% (SHIP trend)	population from NE Germany	20-85	0.5	foced vital capacity (FVC)		cycle	maximal	NR	NR			TSH (thyroid stimulating hormone, MIU/L)									x		Serum TSH levels were measured by immunochemiluminiscent procedures (SHIP-1: Immulite 2000, Third Generation, DPC, Los Angeles, USA; SHIP-Trend-0: Vista, Siemens, Eschborn, Germany).	age, sex, height, weight, beta blocker intake, smoking status, physical activity and time between exams	x	x	x		x	x
36	194		2014	Ittermann	Serum thyroid-stimulating hormone levels are not associated with exercise capacity and lung function parameters in two population-based studies	cross-sectional	Germany		SHIP	2002-2006, 2008-2012			investigate the association of thyroid function state as determined by serum thyroid-stimulating hormone (TSH) levels with parameters of lung function and cardiopulmonary exercise testing (CPET) in two independent population-based studies conducted in Northeast Germany.	4184	eligible subjects were randomly selected from population registries.	residence in Pomerania	NR	0.688	83.5 (SHIP0) 50.3% (SHIP trend)	population from NE Germany	20-85	0.5	ratio (FEV1/FVC)		cycle	maximal	NR	NR			TSH (thyroid stimulating hormone, MIU/L)									x		Serum TSH levels were measured by immunochemiluminiscent procedures (SHIP-1: Immulite 2000, Third Generation, DPC, Los Angeles, USA; SHIP-Trend-0: Vista, Siemens, Eschborn, Germany).	age, sex, height, weight, beta blocker intake, smoking status, physical activity and time between exams	x	x	x		x	x
36	195		2014	Ittermann	Serum thyroid-stimulating hormone levels are not associated with exercise capacity and lung function parameters in two population-based studies	cross-sectional	Germany		SHIP	2002-2006, 2008-2012			investigate the association of thyroid function state as determined by serum thyroid-stimulating hormone (TSH) levels with parameters of lung function and cardiopulmonary exercise testing (CPET) in two independent population-based studies conducted in Northeast Germany.	4184	eligible subjects were randomly selected from population registries.	residence in Pomerania	NR	0.688	83.5 (SHIP0) 50.3% (SHIP trend)	population from NE Germany	20-85	0.5	VO2max (ml/min)		cycle	maximal	NR	NR			TSH (thyroid stimulating hormone, MIU/L)									x		Serum TSH levels were measured by immunochemiluminiscent procedures (SHIP-1: Immulite 2000, Third Generation, DPC, Los Angeles, USA; SHIP-Trend-0: Vista, Siemens, Eschborn, Germany).	age, sex, height, weight, beta blocker intake, smoking status, physical activity and time between exams	x	x	x		x	x
36	196		2014	Ittermann	Serum thyroid-stimulating hormone levels are not associated with exercise capacity and lung function parameters in two population-based studies	cross-sectional	Germany		SHIP	2002-2006, 2008-2012			investigate the association of thyroid function state as determined by serum thyroid-stimulating hormone (TSH) levels with parameters of lung function and cardiopulmonary exercise testing (CPET) in two independent population-based studies conducted in Northeast Germany.	4184	eligible subjects were randomly selected from population registries.	residence in Pomerania	NR	0.688	83.5 (SHIP0) 50.3% (SHIP trend)	population from NE Germany	20-85	0.5	Vo2 at anerobic threshold (ml/min)		cycle	maximal	NR	NR			TSH (thyroid stimulating hormone, MIU/L)									x		Serum TSH levels were measured by immunochemiluminiscent procedures (SHIP-1: Immulite 2000, Third Generation, DPC, Los Angeles, USA; SHIP-Trend-0: Vista, Siemens, Eschborn, Germany).	age, sex, height, weight, beta blocker intake, smoking status, physical activity and time between exams	x	x	x		x	x
36	197		2014	Ittermann	Serum thyroid-stimulating hormone levels are not associated with exercise capacity and lung function parameters in two population-based studies	cross-sectional	Germany		SHIP	2002-2006, 2008-2012			investigate the association of thyroid function state as determined by serum thyroid-stimulating hormone (TSH) levels with parameters of lung function and cardiopulmonary exercise testing (CPET) in two independent population-based studies conducted in Northeast Germany.	4184	eligible subjects were randomly selected from population registries.	residence in Pomerania	NR	0.688	83.5 (SHIP0) 50.3% (SHIP trend)	population from NE Germany	20-85	0.5	oxygen pulse, o2HR (ml/beat)		cycle	maximal	NR	NR			TSH (thyroid stimulating hormone, MIU/L)									x		Serum TSH levels were measured by immunochemiluminiscent procedures (SHIP-1: Immulite 2000, Third Generation, DPC, Los Angeles, USA; SHIP-Trend-0: Vista, Siemens, Eschborn, Germany).	age, sex, height, weight, beta blocker intake, smoking status, physical activity and time between exams	x	x	x		x	x
36	198		2014	Ittermann	Serum thyroid-stimulating hormone levels are not associated with exercise capacity and lung function parameters in two population-based studies	cross-sectional	Germany		SHIP	2002-2006, 2008-2012			investigate the association of thyroid function state as determined by serum thyroid-stimulating hormone (TSH) levels with parameters of lung function and cardiopulmonary exercise testing (CPET) in two independent population-based studies conducted in Northeast Germany.	4184	eligible subjects were randomly selected from population registries.	residence in Pomerania	NR	0.688	83.5 (SHIP0) 50.3% (SHIP trend)	population from NE Germany	20-85	0.5	slope of the efficiency of ventilation in removing Co2 (Ve v. VCO2)		cycle	maximal	NR	NR			TSH (thyroid stimulating hormone, MIU/L)									x		Serum TSH levels were measured by immunochemiluminiscent procedures (SHIP-1: Immulite 2000, Third Generation, DPC, Los Angeles, USA; SHIP-Trend-0: Vista, Siemens, Eschborn, Germany).	age, sex, height, weight, beta blocker intake, smoking status, physical activity and time between exams	x	x	x		x	x
36	199		2014	Ittermann	Serum thyroid-stimulating hormone levels are not associated with exercise capacity and lung function parameters in two population-based studies	cross-sectional	Germany		SHIP	2002-2006, 2008-2012			investigate the association of thyroid function state as determined by serum thyroid-stimulating hormone (TSH) levels with parameters of lung function and cardiopulmonary exercise testing (CPET) in two independent population-based studies conducted in Northeast Germany.	4184	eligible subjects were randomly selected from population registries.	residence in Pomerania	NR	0.688	83.5 (SHIP0) 50.3% (SHIP trend)	population from NE Germany	20-85	0.5	maximum power		cycle	maximal	NR	NR			TSH (thyroid stimulating hormone, MIU/L)									x		Serum TSH levels were measured by immunochemiluminiscent procedures (SHIP-1: Immulite 2000, Third Generation, DPC, Los Angeles, USA; SHIP-Trend-0: Vista, Siemens, Eschborn, Germany).	age, sex, height, weight, beta blocker intake, smoking status, physical activity and time between exams	x	x	x		x	x
36	200		2014	Ittermann	Serum thyroid-stimulating hormone levels are not associated with exercise capacity and lung function parameters in two population-based studies	cross-sectional	Germany		SHIP	2002-2006, 2008-2012			investigate the association of thyroid function state as determined by serum thyroid-stimulating hormone (TSH) levels with parameters of lung function and cardiopulmonary exercise testing (CPET) in two independent population-based studies conducted in Northeast Germany.	4184	eligible subjects were randomly selected from population registries.	residence in Pomerania	NR	0.688	83.5 (SHIP0) 50.3% (SHIP trend)	population from NE Germany	20-85	0.5	exercise duration		cycle	maximal	NR	NR			TSH (thyroid stimulating hormone, MIU/L)									x		Serum TSH levels were measured by immunochemiluminiscent procedures (SHIP-1: Immulite 2000, Third Generation, DPC, Los Angeles, USA; SHIP-Trend-0: Vista, Siemens, Eschborn, Germany).	age, sex, height, weight, beta blocker intake, smoking status, physical activity and time between exams	x	x	x		x	x
37	201	x	2009	Jackson	Role of Lifestyle and Aging on the Longitudinal Change in Cardiorespiratory Fitness	longitudinal	US	NoA	ACLS	1974-2006	Medium	0.588889	The purposes of this study were (1) to define the role of age and lifestyle characteristics of body mass index (BMI; calculated as weight in kilograms divided by height in meters squared), selfreported physical activity index (PAI), and smoking habit on the longitudinal change in CRF; and (2) to develop a model to define the combined role of aging and lifestyle on the longitudinal CRF change.	20318	Participants came to the clinic for periodic preventive health examinations and for counseling regarding diet, exercise, and other lifestyle factors associated with increased risk of chronic disease. Participants were volunteers, not paid, and not recruited to the study as they would be for a clinical trial. Many were sent by their employers for the examination, some were referred by their physic…	individuals who had attended the Cooper Clinic in Dallas TX	Participants were excluded from the present study if they were younger than 20 years (n=30); failed to achieve at least 85% of age-predicted maximal heart rate during the treadmill test (220 minus the age in years) (n=113); had an abnormal finding on a resting or an exercise electrocardiogram (n=388); reported a history of myocardial infarction (n=57), stroke (n=9), diabetes (n=170), or hypertens…	NR	NR	American men and women	20-96	0.168	METS	.	treadmill	maximal	individuals who had attended the Cooper Clinic in Dallas TX	Because we excluded individuals with chronic disease, those who failed to achieve at least 85% of their estimated maximal heart rate on the treadmill test, and those with abnormal exercise test results, the study population was healthier than the overall cohort.	Balke protocol	.	AGE	x										self report	age2, BMI, PAI, Smoking	x			x		x
37	202		2009	Jackson	Role of Lifestyle and Aging on the Longitudinal Change in Cardiorespiratory Fitness	longitudinal	US		ACLS	1974-2006			The purposes of this study were (1) to define the role of age and lifestyle characteristics of body mass index (BMI; calculated as weight in kilograms divided by height in meters squared), selfreported physical activity index (PAI), and smoking habit on the longitudinal change in CRF; and (2) to develop a model to define the combined role of aging and lifestyle on the longitudinal CRF change.	20318	Participants came to the clinic for periodic preventive health examinations and for counseling regarding diet, exercise, and other lifestyle factors associated with increased risk of chronic disease. Participants were volunteers, not paid, and not recruited to the study as they would be for a clinical trial. Many were sent by their employers for the examination, some were referred by their physic…	individuals who had attended the Cooper Clinic in Dallas TX	Participants were excluded from the present study if they were younger than 20 years (n=30); failed to achieve at least 85% of age-predicted maximal heart rate during the treadmill test (220 minus the age in years) (n=113); had an abnormal finding on a resting or an exercise electrocardiogram (n=388); reported a history of myocardial infarction (n=57), stroke (n=9), diabetes (n=170), or hypertens…	NR	NR	American men and women	20-96	0.17	METS		treadmill	maximal	individuals who had attended the Cooper Clinic in Dallas TX	Because we excluded individuals with chronic disease, those who failed to achieve at least 85% of their estimated maximal heart rate on the treadmill test, and those with abnormal exercise test results, the study population was healthier than the overall cohort.			Age²	x										self report	age, BMI, PAI, Smoking	x			x		x
37	203		2009	Jackson	Role of Lifestyle and Aging on the Longitudinal Change in Cardiorespiratory Fitness	longitudinal	US		ACLS	1974-2006			The purposes of this study were (1) to define the role of age and lifestyle characteristics of body mass index (BMI; calculated as weight in kilograms divided by height in meters squared), selfreported physical activity index (PAI), and smoking habit on the longitudinal change in CRF; and (2) to develop a model to define the combined role of aging and lifestyle on the longitudinal CRF change.	20318	Participants came to the clinic for periodic preventive health examinations and for counseling regarding diet, exercise, and other lifestyle factors associated with increased risk of chronic disease. Participants were volunteers, not paid, and not recruited to the study as they would be for a clinical trial. Many were sent by their employers for the examination, some were referred by their physic…	individuals who had attended the Cooper Clinic in Dallas TX	Participants were excluded from the present study if they were younger than 20 years (n=30); failed to achieve at least 85% of age-predicted maximal heart rate during the treadmill test (220 minus the age in years) (n=113); had an abnormal finding on a resting or an exercise electrocardiogram (n=388); reported a history of myocardial infarction (n=57), stroke (n=9), diabetes (n=170), or hypertens…	NR	NR	American men and women	20-96	0.17	METS		treadmill	maximal	individuals who had attended the Cooper Clinic in Dallas TX	Because we excluded individuals with chronic disease, those who failed to achieve at least 85% of their estimated maximal heart rate on the treadmill test, and those with abnormal exercise test results, the study population was healthier than the overall cohort.			BMI (kg/m2)				x							Height and weight were measured on a physician’s scale and stadiometer at the time of each treadmill test.	age, age2, PAI, Smoking	x					x
37	204		2009	Jackson	Role of Lifestyle and Aging on the Longitudinal Change in Cardiorespiratory Fitness	longitudinal	US		ACLS	1974-2006			The purposes of this study were (1) to define the role of age and lifestyle characteristics of body mass index (BMI; calculated as weight in kilograms divided by height in meters squared), selfreported physical activity index (PAI), and smoking habit on the longitudinal change in CRF; and (2) to develop a model to define the combined role of aging and lifestyle on the longitudinal CRF change.	20318	Participants came to the clinic for periodic preventive health examinations and for counseling regarding diet, exercise, and other lifestyle factors associated with increased risk of chronic disease. Participants were volunteers, not paid, and not recruited to the study as they would be for a clinical trial. Many were sent by their employers for the examination, some were referred by their physic…	individuals who had attended the Cooper Clinic in Dallas TX	Participants were excluded from the present study if they were younger than 20 years (n=30); failed to achieve at least 85% of age-predicted maximal heart rate during the treadmill test (220 minus the age in years) (n=113); had an abnormal finding on a resting or an exercise electrocardiogram (n=388); reported a history of myocardial infarction (n=57), stroke (n=9), diabetes (n=170), or hypertens…	NR	NR	American men and women	20-96	0.17	METS		treadmill	maximal	individuals who had attended the Cooper Clinic in Dallas TX	Because we excluded individuals with chronic disease, those who failed to achieve at least 85% of their estimated maximal heart rate on the treadmill test, and those with abnormal exercise test results, the study population was healthier than the overall cohort.			PAI (1-4)						x					The self-reported PAI consisted of 5 categories based on the patients’ responses to questions in the medical history questionnaire about their regular physical activity habits during the past 3 months. If they reported participation in an activity, the patient was asked to provide additional information about the type of activity, number oftimes per week, duration ofeach exercise session, and dis…	age, age2, BMI, Smoking	x			x
37	205		2009	Jackson	Role of Lifestyle and Aging on the Longitudinal Change in Cardiorespiratory Fitness	longitudinal	US		ACLS	1974-2006			The purposes of this study were (1) to define the role of age and lifestyle characteristics of body mass index (BMI; calculated as weight in kilograms divided by height in meters squared), selfreported physical activity index (PAI), and smoking habit on the longitudinal change in CRF; and (2) to develop a model to define the combined role of aging and lifestyle on the longitudinal CRF change.	20318	Participants came to the clinic for periodic preventive health examinations and for counseling regarding diet, exercise, and other lifestyle factors associated with increased risk of chronic disease. Participants were volunteers, not paid, and not recruited to the study as they would be for a clinical trial. Many were sent by their employers for the examination, some were referred by their physic…	individuals who had attended the Cooper Clinic in Dallas TX	Participants were excluded from the present study if they were younger than 20 years (n=30); failed to achieve at least 85% of age-predicted maximal heart rate during the treadmill test (220 minus the age in years) (n=113); had an abnormal finding on a resting or an exercise electrocardiogram (n=388); reported a history of myocardial infarction (n=57), stroke (n=9), diabetes (n=170), or hypertens…	NR	NR	American men and women	20-96	0.17	METS		treadmill	maximal	individuals who had attended the Cooper Clinic in Dallas TX	Because we excluded individuals with chronic disease, those who failed to achieve at least 85% of their estimated maximal heart rate on the treadmill test, and those with abnormal exercise test results, the study population was healthier than the overall cohort.			current smoking							x				self report	age, age2, BMI, PAI,	x			x		x
38	206	x	2001	Kemper	A 15-year physical activity pattern is positively related to aerobic fitness in young males and females (13±27 years)	longitudinal	Netherlands	EU	AGAHLS	1977-1997	Medium	0.633333	Three research questions were studied: (1) Is there a positive relationship between adolescent fitness (age 13–17 years) and adult physical activity (age 33 years)? (2) Do physical fitness and physical activity track from adolescence into adulthood? (3) What is the longitudinal relationship between physical fitness and physical activity?	365	The subjects originally came from two secondary schools in the area of Amsterdam. All pupils (boys and girls) in the first and second form were invited to participate in the study during their school career. Measurements in the first 4 years took place during normal school hours in a mobile laboratory, which was located in the direct vicinity of the school building (Kemper et al., 1983). During t…	The pupils were from three birth cohorts: 1962, 1963, and 1964.	NR	NR	24% (1-4) 9%(5th)	adults	13-16, 33	0.54	Vo2max (ml min-1 kg-2/3)	x	treadmill	maximal	NR	NR		x	weighted PA						x					light (4±7 MET), medium±heavy (7±10 MET), and heavy (more than 10 MET) For purpose of scoring, the MET assigned to these categories were 5.5, 8.5 and 11.5, respectively. The interview assessed the average weekly time spent in activities in each of the three categories and expressed the result as MET per week, derived by multiplying the average time spent per week (minutes) in each category by the…	sex, time, initial Vo2max, (dietary intake, smoking and alcohol consumption) (blood pressure, serum cholesterol concentration, and body fatness).		x		x
39	207	x	2011	Kim	Changes in Cardiorespiratory Fitness, Body Composition, and Physical Activity of Women Aged 20 to 68 Years	cross-sectional	Korea	AS	NA	NR	Medium	0.418605	he purpose of this cross-sectional study was to evaluate age-associated changes in CRF, physical activity and body composition in healthy adult Korean women (n = 465, age range: 20-68 yrs.) for increased age.	465	NR	NR	NR	NR	NR	healthy adult Korean women (Gyeongi-Do area/ Seoul city area)	20-68	1	VO2max (ml/kg/min)	.	treadmill	maximal	NR	NR	modified Bruce protokol, breath-by-breath	x	age	x											fat%, sedentary PA (weekly total PA), moderate PA (mPA, weekly PA at moderate intensity including walking, running, public transport and rec activities)				x		x
39	208		2011	Kim J.	Changes in Cardiorespiratory Fitness, Body Composition, and Physical Activity of Women Aged 20 to 68 Years	cross-sectional	Korea		NA	NR			he purpose of this cross-sectional study was to evaluate age-associated changes in CRF, physical activity and body composition in healthy adult Korean women (n = 465, age range: 20-68 yrs.) for increased age.	465	NR	NR	NR	NR	NR	healthy adult Korean women (Gyeongi-Do area/ Seoul city area)	20-68	1	VO2max (ml/kg/min)		treadmill	maximal	NR	NR	modified Bruce protokol, breath-by-breath		fat%				x							tetra-polar 8-point tactile electrode method.	age, sedentary PA (weekly total PA), moderate PA (mPA, weekly PA at moderate intensity including walking, running, public transport and rec activities)	x					x
39	209		2011	Kim J.	Changes in Cardiorespiratory Fitness, Body Composition, and Physical Activity of Women Aged 20 to 68 Years	cross-sectional	Korea		NA	NR			he purpose of this cross-sectional study was to evaluate age-associated changes in CRF, physical activity and body composition in healthy adult Korean women (n = 465, age range: 20-68 yrs.) for increased age.	465	NR	NR	NR	NR	NR	healthy adult Korean women (Gyeongi-Do area/ Seoul city area)	20-68	1	VO2max (ml/kg/min)		treadmill	maximal	NR	NR	modified Bruce protokol, breath-by-breath		sedentary PA (weekly total PA)						x					Weekly PA was estimated by IPAQ (international physical activity questionnaire) short format in 2008.Sedentary physical activity (sPA) was defined as weekly low intensity of total physical activity hours by doing activities at home or workplace including sedentary work, TV watching, and sedentary plays.	age, fat%, moderate PA (mPA, weekly PA at moderate intensity including walking, running, public transport and rec activities)	x			x		x
39	210		2011	Kim J.	Changes in Cardiorespiratory Fitness, Body Composition, and Physical Activity of Women Aged 20 to 68 Years	cross-sectional	Korea		NA	NR			he purpose of this cross-sectional study was to evaluate age-associated changes in CRF, physical activity and body composition in healthy adult Korean women (n = 465, age range: 20-68 yrs.) for increased age.	465	NR	NR	NR	NR	NR	healthy adult Korean women (Gyeongi-Do area/ Seoul city area)	20-68	1	VO2max (ml/kg/min)		treadmill	maximal	NR	NR	modified Bruce protokol, breath-by-breath		moderate PA (mPA, weekly PA at moderate intensity including walking, running, public transport and rec activities)						x					Weekly PA was estimated by IPAQ (international physical activity questionnaire) short format in 2008.Moderate physical activity (mPA) was defined as weekly moderate intensity of total physical activity hours by doing activities including running, walking, public transportation and recreational hours	age, fat%, sedentary PA (weekly total PA),	x			x		x
40	211	x	2009	Koch	Reference values for cardiopulmonary exercise testing in healthy volunteers: the SHIP study	cross-sectional	Germany	EU	SHIP1	2003-2006	Low	0.755556	acquire a comprehensive set of reference values for cardiopulmonary responses to exercise and to evaluate possible associations with sex, age and body mass index (BMI).	534	a sample was selected from the population registration offices, where all German inhabitants are registered. A two-stage cluster sampling method was adopted from the World Health Organization (WHO) Monitoring Cardiovascular Disease Project in Augsburg, Germany [8]. A representative sample was drawn, comprising 7,008 adults aged 20–79 yrs. with 292 persons of each sex in each of the twelve 5-yr ag…	Study volunteers consisted of participants of the Study of Health in Pomerania (SHIP).	past myocardial infarction, signs of ischaemia/ infarction, right or left bundle branch block or Wolff Parkinson-White syndrome in the ECG; the presence of a cardiac pacemaker, stenosis or insufficiency of the cardiac valves, systolic and diastolic failures or a cardiac shunt vitium found in the echocardiography; pulmonary diseases, bronchial asthma, chronic obstructive bronchitis (ratio of force…	0.77	0.33	healthy individuals in Pomerania	25-85	0.51	VO2max (ml/kg/min)	x	cycle	maximal	NR	NA		x	age	x											age2, sex, BMI, AgeBMI, AgeSex, AgeSexBMI, SexBMI		x		x
40	212		2009	Koch	Reference values for cardiopulmonary exercise testing in healthy volunteers: the SHIP study	cross-sectional	Germany		SHIP1	2003-2006			acquire a comprehensive set of reference values for cardiopulmonary responses to exercise and to evaluate possible associations with sex, age and body mass index (BMI).	534	a sample was selected from the population registration offices, where all German inhabitants are registered. A two-stage cluster sampling method was adopted from the World Health Organization (WHO) Monitoring Cardiovascular Disease Project in Augsburg, Germany [8]. A representative sample was drawn, comprising 7,008 adults aged 20–79 yrs. with 292 persons of each sex in each of the twelve 5-yr ag…	Study volunteers consisted of participants of the Study of Health in Pomerania (SHIP).	past myocardial infarction, signs of ischaemia/ infarction, right or left bundle branch block or Wolff Parkinson-White syndrome in the ECG; the presence of a cardiac pacemaker, stenosis or insufficiency of the cardiac valves, systolic and diastolic failures or a cardiac shunt vitium found in the echocardiography; pulmonary diseases, bronchial asthma, chronic obstructive bronchitis (ratio of force…	0.77	0.33	healthy individuals in Pomerania	25-85	0.51	VO2max (ml/kg/min)		cycle	maximal	NR	NA			sex		x										age2, age, BMI, AgeBMI, AgeSex, AgeSexBMI, SexBMI	x			x
40	213		2009	Koch	Reference values for cardiopulmonary exercise testing in healthy volunteers: the SHIP study	cross-sectional	Germany		SHIP1	2003-2006			acquire a comprehensive set of reference values for cardiopulmonary responses to exercise and to evaluate possible associations with sex, age and body mass index (BMI).	534	a sample was selected from the population registration offices, where all German inhabitants are registered. A two-stage cluster sampling method was adopted from the World Health Organization (WHO) Monitoring Cardiovascular Disease Project in Augsburg, Germany [8]. A representative sample was drawn, comprising 7,008 adults aged 20–79 yrs. with 292 persons of each sex in each of the twelve 5-yr ag…	Study volunteers consisted of participants of the Study of Health in Pomerania (SHIP).	past myocardial infarction, signs of ischaemia/ infarction, right or left bundle branch block or Wolff Parkinson-White syndrome in the ECG; the presence of a cardiac pacemaker, stenosis or insufficiency of the cardiac valves, systolic and diastolic failures or a cardiac shunt vitium found in the echocardiography; pulmonary diseases, bronchial asthma, chronic obstructive bronchitis (ratio of force…	0.77	0.33	healthy individuals in Pomerania	25-85	0.51	VO2max (ml/kg/min)		cycle	maximal	NR	NA			BMI				x							Height and weight were measured for the calculation of the body mass index (BMI; body weight in kg divided by square of height in metres).	age2, age, sex, AgeBMI, AgeSex, AgeSexBMI, SexBMI	x	x
41	214	x	2005	Kondo	Association of Inflammatory Marker and Highly Sensitive C-Reactive Protein With Aerobic Exercise Capacity, Maximum Oxygen Uptake and Insulin Resistance in Healthy Middle-Aged Volunteers	cross-sectional	Japan	AS	NA	NR	High	0.325581	evaluated whether maximum oxygen uptake and insulin resistance are related to hs-CRP for the primary prevention of coronary heart disease	50	NR	50 healthy workers who underwent health examinations at workers’ health promotion service centers in accordance with the Total Health Promotion Plan (THP) of Japan.	NR	NR	NR	healthy workers	45.6(±15.3)	0.28	VO2max (ml/kg/min)	.	treadmill	submaximal		heart disease, uncontrolled hypertension, acute active medical diseases, or severe physical handicaps	Astrand and Kodahl fitness test	.	high-sensitive C-reactive protein (hs-CRP); Measurement NR									x		NR	NA
42	215	x	2014	Kulinski	Association between Cardiorespiratory Fitness and Accelerometer-Derived Physical Activity and Sedentary Time in the General Population	cross-sectional	US	NoA	NHANES	2003-2004	Low	0.848837	characterize the associations between sedentary behaviour and CRF using data from National Health and Nutrition Examination Survey (NHANES) 2003-2004.	2223	Fifteen geographic locations are selected annually and sampled to represent the general population with a complex, multi-stage probability design.	individuals aged 12-49	physical limitations that would prevent them from using the treadmill (n=328); history of cardiovascular disease or active conditions or symptoms (n=336); asthma or other lung and breathing conditions or symptoms (n=291); pregnancy > 12 weeks (n=203); use of β blockers, anti-arrhythmias, calcium channel blockers, nitrates or digitalis (n=97); refused fitness testing (n=67); or other reasons (n=11…	NR	NR	individuals aged 12-49	12-49	0.47	VO2max (ml/kg/min)	.	treadmill	submaximal	physical limitations that would prevent them from using the treadmill (n=328); history of cardiovascular disease or active conditions or symptoms (n=336); asthma or other lung and breathing conditions or symptoms (n=291); pregnancy > 12 weeks (n=203); use of β blockers, anti-arrhythmias, calcium channel blockers, nitrates or digitalis (n=97); refused fitness testing (n=67); or other reasons (n=11…	NR	individual (NHANES)	.	sedentary PA						x					The data collected by the physical activity monitor reflects the intensity of activity as counts in a set period of time (1-minute intervals) and were analysed using SAS syntax provided by the National Cancer Institute.19 Wear time was determined by subtracting non-wear time from 24 hours. Non-wear time was defined by an interval of at least 60 consecutive minutes of zero activity counts, with al…	age, BMI, mean wear time	x			x
42	216		2014	Kulinski	Association between Cardiorespiratory Fitness and Accelerometer-Derived Physical Activity and Sedentary Time in the General Population	cross-sectional	US		NHANES	2003-2004			characterize the associations between sedentary behaviour and CRF using data from National Health and Nutrition Examination Survey (NHANES) 2003-2004.	2223	Fifteen geographic locations are selected annually and sampled to represent the general population with a complex, multi-stage probability design.	individuals aged 12-49	physical limitations that would prevent them from using the treadmill (n=328); history of cardiovascular disease or active conditions or symptoms (n=336); asthma or other lung and breathing conditions or symptoms (n=291); pregnancy > 12 weeks (n=203); use of β blockers, anti-arrhythmias, calcium channel blockers, nitrates or digitalis (n=97); refused fitness testing (n=67); or other reasons (n=11…	NR	NR	individuals aged 12-49	12-49	0.47	VO2max (ml/kg/min)		treadmill	submaximal	NR	NR			moderate and vigorous PA						x					The data collected by the physical activity monitor reflects the intensity of activity as counts in a set period of time (1-minute intervals) and were analysed using SAS syntax provided by the National Cancer Institute.19 Wear time was determined by subtracting non-wear time from 24 hours. Non-wear time was defined by an interval of at least 60 consecutive minutes of zero activity counts, with al…	age, BMI, mean wear time	x			x
43	217	x	2005	Kuo_1	Levels of homocysteine are inversely associated with cardiovascular fitness in women, but not in men: data from the National Health and Nutrition Examination Survey 1999–2002	cross-sectional	US	NoA	NHANES	1999-2002	Low	0.895349	examine the association between homocysteine and cardiovascular fitness in both men and women using data from the National Health and Nutrition Examination Survey (NHANES) 1999–2002.	1444	Fifteen geographic locations are selected annually and sampled to represent the general population with a complex, multi-stage probability design.	noninstitutionalized adults aged 20-49	(i) physical functioning limitations, such as difficulties in walking/standing, having fractures or bone/joint injuries, requiring a cane or a wheel- chair, having amputations of legs or feet, blind, diabetic retinopathy, loss of balance/consciousness on a regular basis, and obese (>350 lb); (ii) cardio- vascular conditions/symptoms, such as congestive heart failure, coronary heart disease, angin…	NR	NR	noninstitutionalized adults aged 20-49	20-49	0.51	VO2max (ml/kg/min)	.	treadmill	submaximal	NR	subjects’ refusal of undergoing or continuing the test (15), technical problems occurring during the test (707), participant discomfort or distress, such as chest pain, dizziness, or development of wheezing, which was observed by the health technician or reported by the participant (35), significant haemodynamic changes, such as exercise blood pressure >260 systolic and/or 115 mmHg diastolic, or …	individual (NHANES)	.	homocysteine levels									x		Blood specimens were collected at mobile examination centres and were frozen before analysis. Plasma homocysteine was measured by the Abbott homocysteine assay (Abbott Laboratories, Abbott Park, IL, USA), a fully automated fluorescence polarization immunoassay (FPIA) method. Plasma total homocysteine concentrations were calculated by the Abbott IMx Immunoassay Analyzer using a machine-stored cali…	age, race and body mass index; chronic diseases (hypertension and diabe- tes) + use of lipid-lowering agents + health behaviours (smoking, alcohol consumption and physical activity) + self-report health condition; levels of folate, vitamin B12, creatinine, C-reactive protein, total cholesterol and haemoglobin.	x		x	x
44	218	x	2007	Kuo_2	Association of cardiorespiratory fitness and levels of C-reactive protein: Data from the National Health and Nutrition Examination Survey 1999–2002	cross-sectional	US	NoA	NHANES	1999-2002	Low	0.802326	test the hypothesis that concentrations of CRP are associated with cardiorespiratory fitness independent of traditional cardiovascular diseases and risk factors. We sought to test the hypothesis by analysing data from the National Health and Nutrition Examination Survey (NHANES) 1999–2002.	1438	Fifteen geographic locations are selected annually and sampled to represent the general population with a complex, multi-stage probability design.	noninstitutionalized adults aged 20-49	(1) physical functioning limitations, such as difficulties in walking/standing, having fractures or bone/joint injuries, requiring a cane or a wheelchair, having amputations of legs or feet, blind, diabetic retinopathy, loss of balance/consciousness on a regular basis, and obese (>350 lb); (2) cardiovascular conditions/symptoms, such as congestive heart failure, coronary heart disease, angina, st…	NR	NR	noninstitutionalized adults aged 20-49	20-49	0.51	VO2max (ml/kg/min)	.	treadmill	submaximal	NR	1310 subjects experienced the following problems during the fitness test which might result in inaccurate VO2max estimations or even missing values: subjects’ refusal of undergoing or continuing the test (15 subjects), technical problems occurring during the test (707 subjects), participant- pant discomfort or distress, such as chest pain, dizziness, or development of wheezing, which was observed…	individual (NHANES)	.	C-reactive protein									x		Blood specimens were collected at the mobile examination- centres and analysed at the University of Washington Department of Laboratory Medicine. CRP was quantified by utilizing latex-enhanced nephelometry with a Behring Nephelometer Analyzer System.	age, race, and body mass index category, hypertension, diabetes, smoking status, alcohol consumption, and use of medications including NSAIDs, steroid, lipid-lowering agents, antimicrobials, or estrogen/progesterone (in women).	x		x	x
45	219	x	1996	Lakka	Conditioning Leisure Time Physical Activity and Cardiorespiratory Fitness in Sociodemographic Groups of Middle-Aged Men in Eastern Finland	cross-sectional	Finland	EU	KIHD	1984-1989 (baseline) FU through 1998	Medium	0.55814	The main purpose of this paper is to characterize those who have the lowest level of conditioning leisure time physical activity and V02max and who therefore could be at increased risk of chronic diseases.	2280	The study population is a ran- dom sample of men living in the town of Kuopio or neighbouring rural communities, stratified and bal- anced according to age, and who were 42, 48, 54, or 60 years old at the baseline examination.	men in Eastern Finland	NR	NR	NR	men in Eastern Finland	42-60	0	VO2max (l/min)	.	cycle	maximal	NR	NR	Individual (For 616 men before June 1986, 3-minute warm-up at 50 W followed by a step-by-step increase in the workload by 20 W/minute. remaining 1664 men linear increase in the workload by 20 W/minute	x	age	x										self report	duration, mean intensity of conditioning physical activity, medical history, examination year
45	220		1996	Lakka	Conditioning Leisure Time Physical Activity and Cardiorespiratory Fitness in Sociodemographic Groups of Middle-Aged Men in Eastern Finland	cross-sectional	Finland		KIHD	1984-1989 (baseline) FU through 1998			The main purpose of this paper is to characterize those who have the lowest level of conditioning leisure time physical activity and V02max and who therefore could be at increased risk of chronic diseases.	2280	The study population is a ran- dom sample of men living in the town of Kuopio or neighbouring rural communities, stratified and bal- anced according to age, and who were 42, 48, 54, or 60 years old at the baseline examination.	men in Eastern Finland	NR	NR	NR	men in Eastern Finland	42-60	0	VO2max (l/min)		cycle	maximal	NR	NR	Individual (For 616 men before June 1986, 3-minute warm-up at 50 W followed by a step-by-step increase in the workload by 20 W/minute. remaining 1664 men linear increase in the workload by 20 W/minute		place of residence (urban/rural)					x						self report	duration, mean intensity of conditioning physical activity, medical history
45	221		1996	Lakka	Conditioning Leisure Time Physical Activity and Cardiorespiratory Fitness in Sociodemographic Groups of Middle-Aged Men in Eastern Finland	cross-sectional	Finland		KIHD	1984-1989 (baseline) FU through 1998			The main purpose of this paper is to characterize those who have the lowest level of conditioning leisure time physical activity and V02max and who therefore could be at increased risk of chronic diseases.	2280	The study population is a ran- dom sample of men living in the town of Kuopio or neighbouring rural communities, stratified and bal- anced according to age, and who were 42, 48, 54, or 60 years old at the baseline examination.	men in Eastern Finland	NR	NR	NR	men in Eastern Finland	42-60	0	VO2max (l/min)		cycle	maximal	NR	NR	Individual (For 616 men before June 1986, 3-minute warm-up at 50 W followed by a step-by-step increase in the workload by 20 W/minute. remaining 1664 men linear increase in the workload by 20 W/minute		marital status										x	self report; marital status (married, or engaged; never married, divorced, or widowed),	duration, mean intensity of conditioning physical activity, medical history
45	222		1996	Lakka	Conditioning Leisure Time Physical Activity and Cardiorespiratory Fitness in Sociodemographic Groups of Middle-Aged Men in Eastern Finland	cross-sectional	Finland		KIHD	1984-1989 (baseline) FU through 1998			The main purpose of this paper is to characterize those who have the lowest level of conditioning leisure time physical activity and V02max and who therefore could be at increased risk of chronic diseases.	2280	The study population is a ran- dom sample of men living in the town of Kuopio or neighbouring rural communities, stratified and bal- anced according to age, and who were 42, 48, 54, or 60 years old at the baseline examination.	men in Eastern Finland	NR	NR	NR	men in Eastern Finland	42-60	0	VO2max (l/min)		cycle	maximal	NR	NR	Individual (For 616 men before June 1986, 3-minute warm-up at 50 W followed by a step-by-step increase in the workload by 20 W/minute. remaining 1664 men linear increase in the workload by 20 W/minute		education					x						self report; highest level of education (less than elementary school; elementary school; junior high school or a part of senior high school; senior high school or above),	duration, mean intensity of conditioning physical activity, medical history
45	223		1996	Lakka	Conditioning Leisure Time Physical Activity and Cardiorespiratory Fitness in Sociodemographic Groups of Middle-Aged Men in Eastern Finland	cross-sectional	Finland		KIHD	1984-1989 (baseline) FU through 1998			The main purpose of this paper is to characterize those who have the lowest level of conditioning leisure time physical activity and V02max and who therefore could be at increased risk of chronic diseases.	2280	The study population is a ran- dom sample of men living in the town of Kuopio or neighbouring rural communities, stratified and bal- anced according to age, and who were 42, 48, 54, or 60 years old at the baseline examination.	men in Eastern Finland	NR	NR	NR	men in Eastern Finland	42-60	0	VO2max (l/min)		cycle	maximal	NR	NR	Individual (For 616 men before June 1986, 3-minute warm-up at 50 W followed by a step-by-step increase in the workload by 20 W/minute. remaining 1664 men linear increase in the workload by 20 W/minute		employment					x						self report; reported occupational activity in the occupational physical act- ivity interview.	duration, mean intensity of conditioning physical activity, medical history
45	224		1996	Lakka	Conditioning Leisure Time Physical Activity and Cardiorespiratory Fitness in Sociodemographic Groups of Middle-Aged Men in Eastern Finland	cross-sectional	Finland		KIHD	1984-1989 (baseline) FU through 1998			The main purpose of this paper is to characterize those who have the lowest level of conditioning leisure time physical activity and V02max and who therefore could be at increased risk of chronic diseases.	2280	The study population is a ran- dom sample of men living in the town of Kuopio or neighbouring rural communities, stratified and bal- anced according to age, and who were 42, 48, 54, or 60 years old at the baseline examination.	men in Eastern Finland	NR	NR	NR	men in Eastern Finland	42-60	0	VO2max (l/min)		cycle	maximal	NR	NR	Individual (For 616 men before June 1986, 3-minute warm-up at 50 W followed by a step-by-step increase in the workload by 20 W/minute. remaining 1664 men linear increase in the workload by 20 W/minute		occupation					x						self report; longest lifetime occupation (farmers; blue-collar workers; white- collar workers),	duration, mean intensity of conditioning physical activity, medical history
45	225		1996	Lakka	Conditioning Leisure Time Physical Activity and Cardiorespiratory Fitness in Sociodemographic Groups of Middle-Aged Men in Eastern Finland	cross-sectional	Finland		KIHD	1984-1989 (baseline) FU through 1998			The main purpose of this paper is to characterize those who have the lowest level of conditioning leisure time physical activity and V02max and who therefore could be at increased risk of chronic diseases.	2280	The study population is a ran- dom sample of men living in the town of Kuopio or neighbouring rural communities, stratified and bal- anced according to age, and who were 42, 48, 54, or 60 years old at the baseline examination.	men in Eastern Finland	NR	NR	NR	men in Eastern Finland	42-60	0	VO2max (l/min)		cycle	maximal	NR	NR	Individual (For 616 men before June 1986, 3-minute warm-up at 50 W followed by a step-by-step increase in the workload by 20 W/minute. remaining 1664 men linear increase in the workload by 20 W/minute		income					x						self report; income from the past 12 months (in quartiles)	duration, mean intensity of conditioning physical activity, medical history
45	226		1996	Lakka	Conditioning Leisure Time Physical Activity and Cardiorespiratory Fitness in Sociodemographic Groups of Middle-Aged Men in Eastern Finland	cross-sectional	Finland		KIHD	1984-1989 (baseline) FU through 1998			The main purpose of this paper is to characterize those who have the lowest level of conditioning leisure time physical activity and V02max and who therefore could be at increased risk of chronic diseases.	2280	The study population is a ran- dom sample of men living in the town of Kuopio or neighbouring rural communities, stratified and bal- anced according to age, and who were 42, 48, 54, or 60 years old at the baseline examination.	men in Eastern Finland	NR	NR	NR	men in Eastern Finland	42-60	0	VO2max (l/min)		cycle	maximal	NR	NR	Individual (For 616 men before June 1986, 3-minute warm-up at 50 W followed by a step-by-step increase in the workload by 20 W/minute. remaining 1664 men linear increase in the workload by 20 W/minute		Conditioning Physical activity (Kcal/week, energy expenditure)						x					The checklist included the most common leis- ure time physical activities of middle-aged Finnish men, selected on the basis of a previous population study in Finland.29 For each activity performed, the subjects were asked to record the frequency (number of sessions/month), average duration (hours and min- utes/session), and intensity (scored as 0 for recrea- tional, 1 for conditioning, 2 for bris…	age, examination year	x
45	227		1996	Lakka	Conditioning Leisure Time Physical Activity and Cardiorespiratory Fitness in Sociodemographic Groups of Middle-Aged Men in Eastern Finland	cross-sectional	Finland		KIHD	1984-1989 (baseline) FU through 1998			The main purpose of this paper is to characterize those who have the lowest level of conditioning leisure time physical activity and V02max and who therefore could be at increased risk of chronic diseases.	2280	The study population is a ran- dom sample of men living in the town of Kuopio or neighbouring rural communities, stratified and bal- anced according to age, and who were 42, 48, 54, or 60 years old at the baseline examination.	men in Eastern Finland	NR	NR	NR	men in Eastern Finland	42-60	0	VO2max (l/min)		cycle	maximal	NR	NR	Individual (For 616 men before June 1986, 3-minute warm-up at 50 W followed by a step-by-step increase in the workload by 20 W/minute. remaining 1664 men linear increase in the workload by 20 W/minute		Conditioning Physical activity (Duration, hrs/week)						x					The checklist included the most common leis- ure time physical activities of middle-aged Finnish men, selected on the basis of a previous population study in Finland.29 For each activity performed, the subjects were asked to record the frequency (number of sessions/month), average duration (hours and min- utes/session), and intensity (scored as 0 for recrea- tional, 1 for conditioning, 2 for bris…	age, examination year	x
45	228		1996	Lakka	Conditioning Leisure Time Physical Activity and Cardiorespiratory Fitness in Sociodemographic Groups of Middle-Aged Men in Eastern Finland	cross-sectional	Finland		KIHD	1984-1989 (baseline) FU through 1998			The main purpose of this paper is to characterize those who have the lowest level of conditioning leisure time physical activity and V02max and who therefore could be at increased risk of chronic diseases.	2280	The study population is a ran- dom sample of men living in the town of Kuopio or neighbouring rural communities, stratified and bal- anced according to age, and who were 42, 48, 54, or 60 years old at the baseline examination.	men in Eastern Finland	NR	NR	NR	men in Eastern Finland	42-60	0	VO2max (l/min)		cycle	maximal	NR	NR	Individual (For 616 men before June 1986, 3-minute warm-up at 50 W followed by a step-by-step increase in the workload by 20 W/minute. remaining 1664 men linear increase in the workload by 20 W/minute		Conditioning physical activity (mean intensity (METS)						x					The checklist included the most common leis- ure time physical activities of middle-aged Finnish men, selected on the basis of a previous population study in Finland.29 For each activity performed, the subjects were asked to record the frequency (number of sessions/month), average duration (hours and min- utes/session), and intensity (scored as 0 for recrea- tional, 1 for conditioning, 2 for bris…	age, examination year	x
45	229		1996	Lakka	Conditioning Leisure Time Physical Activity and Cardiorespiratory Fitness in Sociodemographic Groups of Middle-Aged Men in Eastern Finland	cross-sectional	Finland		KIHD	1984-1989 (baseline) FU through 1998			The main purpose of this paper is to characterize those who have the lowest level of conditioning leisure time physical activity and V02max and who therefore could be at increased risk of chronic diseases.	2280	The study population is a ran- dom sample of men living in the town of Kuopio or neighbouring rural communities, stratified and bal- anced according to age, and who were 42, 48, 54, or 60 years old at the baseline examination.	men in Eastern Finland	NR	NR	NR	men in Eastern Finland	42-60	0	VO2max (l/min)		cycle	maximal	NR	NR	Individual (For 616 men before June 1986, 3-minute warm-up at 50 W followed by a step-by-step increase in the workload by 20 W/minute. remaining 1664 men linear increase in the workload by 20 W/minute		Occupational PA (kcal/day, energy expenditure)						x					Occupational physical activity was assessed using an interview concerning a typical working day. The interview was performed for all subjects who had been working during the last 12 months, whether they were currently employed or unemployed. The subjects were asked, with an accuracy of 15 minutes, for how long they had done the following basic activities: sitting (given mean intensity, 1.6 MET), …	age, examination year	x
46	230	x	2008	Landhuis	Programming Obesity and Poor Fitness: The Long-term Impact of Childhood Television	longitudinal	New Zealand	OC	Dundein birth cohort	1977-1988 to 2004-2005	Medium	0.577778	To assess whether the long-term effects of childhood television viewing on BMI and cardiorespiratory fitness are mediated by adult viewing.	895	birth cohort Dunedin NZ	indviduals born in Dunedin, New Zealand between April 1972and March 1973	pregnancy	0.91	0.04	Individuals born in Dunedin, NZ between April 972 and March 1973	5-15 and 32	NR	VO2max (ml/kg/min)	.	cycle	submaximal	NR	NR		.	Childhood viewing (5-15)										x	parental report	sex, childhood SES		x			x
46	231		2008	Landhuis	Programming Obesity and Poor Fitness: The Long-term Impact of Childhood Television	longitudinal	New Zealand		Dundein birth cohort	1977-1988to 2009-2010			To assess whether the long-term effects of childhood television viewing on BMI and cardiorespiratory fitness are mediated by adult viewing.	895	birth cohort Dunedin NZ	indviduals born in Dunedin, New Zealand between April 1972and March 1973	pregnancy	0.91	0.04	Individuals born in Dunedin, NZ between April 972 and March 1973	5-15 and 32	NR	VO2max (ml/kg/min)		cycle	submaximal	NR	NR			adult viewing (32)										x	self report	sex, childhood SES		x			x
46	232		2008	Landhuis	Programming Obesity and Poor Fitness: The Long-term Impact of Childhood Television	longitudinal	New Zealand		Dundein birth cohort	1977-1988 to 2009-2010			To assess whether the long-term effects of childhood television viewing on BMI and cardiorespiratory fitness are mediated by adult viewing.	895	birth cohort Dunedin NZ	indviduals born in Dunedin, New Zealand between April 1972and March 1973	pregnancy	0.91	0.04	Individuals born in Dunedin, NZ between April 972 and March 1973	5-15 and 32	NR	VO2max (ml/kg/min)		cycle	submaximal	NR	NR			Childhood viewing (5-15)										x	parental report	adult viewing, sex		x
47	233	x	2009	Laukkanen	Determinants of Cardiorespiratory Fitness in Men Aged 42 to 60 Years With and Without Cardiovascular Disease	cross-sectional	Finland	EU	KIHD	1984-1989 (baseline) FU through 1998	Medium	0.55814	Study determinants of di- rectly measured cardiorespiratory fitness, including age, chronic diseases, use of medications, biochemical factors, body weight, and several health habits such as physical activity, cigarette smoking, alcohol consumption, and nutri- tion, in a population-based sample of middle-aged men, and whether the relative importance of these factors differs with respect to age and…	936	The study population is a ran- dom sample of men living in the town of Kuopio or neighbouring rural communities, stratified and bal- anced according to age, and who were 42, 48, 54, or 60 years old at the baseline examination.	men in Eastern Finland	death, serious disease, or migration away from the area,	2,682 (82%) agreed to partici- pate in the study.	NR	men in Eastern Finland	42-60	0	VO2max (ml/min)	.	cycle	maximal	NR	NR	linear increase in the workload by 20 W/minute breath-by-breath analyses	x	Heart rate at maximal exercise (beats/min)										x	Electrocardio- gram was monitored continuously during and 8 minutes after the test. Heart rates at rest and during exercise were recorded.	Weight (kg), Heart rate at rest (beats/min), Age (yrs.), Intensity of conditioning physical activity (METs)‡,Intake of carbohydrates (g/day), Fasting serum insulin (mud/L), Waist-to-hip circumference ratio, CHD (yes vs no), Frequency of conditioning physical activity (session/week), Asthma (yes vs no), Haemoglobin (g/dl), FEV1	x			x		x
47	234		2009	Laukkanen	Determinants of Cardiorespiratory Fitness in Men Aged 42 to 60 Years With and Without Cardiovascular Disease	cross-sectional	Finland		KIHD	1984-1989 (baseline) FU through 1998			Study determinants of di- rectly measured cardiorespiratory fitness, including age, chronic diseases, use of medications, biochemical factors, body weight, and several health habits such as physical activity, cigarette smoking, alcohol consumption, and nutri- tion, in a population-based sample of middle-aged men, and whether the relative importance of these factors differs with respect to age and…	936	The study population is a ran- dom sample of men living in the town of Kuopio or neighbouring rural communities, stratified and bal- anced according to age, and who were 42, 48, 54, or 60 years old at the baseline examination.	men in Eastern Finland	death, serious disease, or migration away from the area,	2,682 (82%) agreed to partici- pate in the study.	NR	men in Eastern Finland	42-60	0	VO2max (ml/min)		cycle	maximal	NR	NR	linear increase in the workload by 20 W/minute breath-by-breath analyses		Weight (kg)				x							clinically measured	Heart rate at maximal exercise (beats/min), Heart rate at rest (beats/min), Age (yrs.), Intensity of conditioning physical activity (METs)‡,Intake of carbohydrates (g/day), Fasting serum insulin (mud/L), Waist-to-hip circumference ratio, CHD (yes vs no), Frequency of conditioning physical activity (session/week), Asthma (yes vs no), Haemoglobin (g/dl), FEV1	x			x		x
47	235		2009	Laukkanen	Determinants of Cardiorespiratory Fitness in Men Aged 42 to 60 Years With and Without Cardiovascular Disease	cross-sectional	Finland		KIHD	1984-1989 (baseline) FU through 1998			Study determinants of di- rectly measured cardiorespiratory fitness, including age, chronic diseases, use of medications, biochemical factors, body weight, and several health habits such as physical activity, cigarette smoking, alcohol consumption, and nutri- tion, in a population-based sample of middle-aged men, and whether the relative importance of these factors differs with respect to age and…	936	The study population is a ran- dom sample of men living in the town of Kuopio or neighbouring rural communities, stratified and bal- anced according to age, and who were 42, 48, 54, or 60 years old at the baseline examination.	men in Eastern Finland	death, serious disease, or migration away from the area,	2,682 (82%) agreed to partici- pate in the study.	NR	men in Eastern Finland	42-60	0	VO2max (ml/min)		cycle	maximal	NR	NR	linear increase in the workload by 20 W/minute breath-by-breath analyses		Heart rate at rest (beats/min)										x	Electrocardio- gram was monitored continuously during and 8 minutes after the test. Heart rates at rest and during exercise were recorded.	Heart rate at maximal exercise (beats/min), Weight (kg), Age (yrs.), Intensity of conditioning physical activity (METs)‡,Intake of carbohydrates (g/day), Fasting serum insulin (mud/L), Waist-to-hip circumference ratio, CHD (yes vs no), Frequency of conditioning physical activity (session/week), Asthma (yes vs no), Haemoglobin (g/dl), FEV1	x			x		x
47	236		2009	Laukkanen	Determinants of Cardiorespiratory Fitness in Men Aged 42 to 60 Years With and Without Cardiovascular Disease	cross-sectional	Finland		KIHD	1984-1989 (baseline) FU through 1998			Study determinants of di- rectly measured cardiorespiratory fitness, including age, chronic diseases, use of medications, biochemical factors, body weight, and several health habits such as physical activity, cigarette smoking, alcohol consumption, and nutri- tion, in a population-based sample of middle-aged men, and whether the relative importance of these factors differs with respect to age and…	936	The study population is a ran- dom sample of men living in the town of Kuopio or neighbouring rural communities, stratified and bal- anced according to age, and who were 42, 48, 54, or 60 years old at the baseline examination.	men in Eastern Finland	death, serious disease, or migration away from the area,	2,682 (82%) agreed to partici- pate in the study.	NR	men in Eastern Finland	42-60	0	VO2max (ml/min)		cycle	maximal	NR	NR	linear increase in the workload by 20 W/minute breath-by-breath analyses		Age (yrs.)	x										self report	Heart rate at maximal exercise (beats/min), Weight (kg), Heart rate at rest (beats/min), Intensity of conditioning physical activity (METs)‡,Intake of carbohydrates (g/day), Fasting serum insulin (mud/L), Waist-to-hip circumference ratio, CHD (yes vs no), Frequency of conditioning physical activity (session/week), Asthma (yes vs no), Haemoglobin (g/dl), FEV1				x		x
47	237		2009	Laukkanen	Determinants of Cardiorespiratory Fitness in Men Aged 42 to 60 Years With and Without Cardiovascular Disease	cross-sectional	Finland		KIHD	1984-1989 (baseline) FU through 1998			Study determinants of di- rectly measured cardiorespiratory fitness, including age, chronic diseases, use of medications, biochemical factors, body weight, and several health habits such as physical activity, cigarette smoking, alcohol consumption, and nutri- tion, in a population-based sample of middle-aged men, and whether the relative importance of these factors differs with respect to age and…	936	The study population is a ran- dom sample of men living in the town of Kuopio or neighbouring rural communities, stratified and bal- anced according to age, and who were 42, 48, 54, or 60 years old at the baseline examination.	men in Eastern Finland	death, serious disease, or migration away from the area,	2,682 (82%) agreed to partici- pate in the study.	NR	men in Eastern Finland	42-60	0	VO2max (ml/min)		cycle	maximal	NR	NR	linear increase in the workload by 20 W/minute breath-by-breath analyses		Intensity of conditioning physical activity (METs)‡						x					Physical activity was categorized according to type: (1) conditioning physical activity—walking (mean intensity 4.3 METs, range 3.0 to 7.0), jogging (10.2 METs, 7.0 to 12.5), skiing (9.6 METs, 7.0 to 12.5), bicycling (5.9 METs, 4.0 to 9.0), swimming (5.4 METs, 4.0 to 10.0), rowing (5.4 METs, 3.0 to 10.0), ball games (6.7 METs, 4.9 to 9.0), and gym- nastics, dancing, or weight lifting (4.9 METs, 3…	Heart rate at maximal exercise (beats/min), Weight (kg), Heart rate at rest (beats/min), Age (yrs.), Intake of carbohydrates (g/day), Fasting serum insulin (mud/L), Waist-to-hip circumference ratio, CHD (yes vs no), Frequency of conditioning physical activity (session/week), Asthma (yes vs no), Haemoglobin (g/dl), FEV1	x			x		x
47	238		2009	Laukkanen	Determinants of Cardiorespiratory Fitness in Men Aged 42 to 60 Years With and Without Cardiovascular Disease	cross-sectional	Finland		KIHD	1984-1989 (baseline) FU through 1998			Study determinants of di- rectly measured cardiorespiratory fitness, including age, chronic diseases, use of medications, biochemical factors, body weight, and several health habits such as physical activity, cigarette smoking, alcohol consumption, and nutri- tion, in a population-based sample of middle-aged men, and whether the relative importance of these factors differs with respect to age and…	936	The study population is a ran- dom sample of men living in the town of Kuopio or neighbouring rural communities, stratified and bal- anced according to age, and who were 42, 48, 54, or 60 years old at the baseline examination.	men in Eastern Finland	death, serious disease, or migration away from the area,	2,682 (82%) agreed to partici- pate in the study.	NR	men in Eastern Finland	42-60	0	VO2max (ml/min)		cycle	maximal	NR	NR	linear increase in the workload by 20 W/minute breath-by-breath analyses		Intake of carbohydrates (g/day)							x				venous blood samples that were taken after a 12-hour fast.	Heart rate at maximal exercise (beats/min), Weight (kg), Heart rate at rest (beats/min), Age (yrs.), Intensity of conditioning physical activity (METs)‡,Fasting serum insulin (mud/L), Waist-to-hip circumference ratio, CHD (yes vs no), Frequency of conditioning physical activity (session/week), Asthma (yes vs no), Haemoglobin (g/dl), FEV1	x			x		x
47	239		2009	Laukkanen	Determinants of Cardiorespiratory Fitness in Men Aged 42 to 60 Years With and Without Cardiovascular Disease	cross-sectional	Finland		KIHD	1984-1989 (baseline) FU through 1998			Study determinants of di- rectly measured cardiorespiratory fitness, including age, chronic diseases, use of medications, biochemical factors, body weight, and several health habits such as physical activity, cigarette smoking, alcohol consumption, and nutri- tion, in a population-based sample of middle-aged men, and whether the relative importance of these factors differs with respect to age and…	936	The study population is a ran- dom sample of men living in the town of Kuopio or neighbouring rural communities, stratified and bal- anced according to age, and who were 42, 48, 54, or 60 years old at the baseline examination.	men in Eastern Finland	death, serious disease, or migration away from the area,	2,682 (82%) agreed to partici- pate in the study.	NR	men in Eastern Finland	42-60	0	VO2max (ml/min)		cycle	maximal	NR	NR	linear increase in the workload by 20 W/minute breath-by-breath analyses		Fasting serum insulin (mud/L)									x		Serum insulin was determined with a Novo Biolabin radio- immunoassay kit (	Heart rate at maximal exercise (beats/min), Weight (kg), Heart rate at rest (beats/min), Age (yrs.), Intensity of conditioning physical activity (METs)‡,Intake of carbohydrates (g/day), Waist-to-hip circumference ratio, CHD (yes vs no), Frequency of conditioning physical activity (session/week), Asthma (yes vs no), Haemoglobin (g/dl), FEV1	x			x		x
47	240		2009	Laukkanen	Determinants of Cardiorespiratory Fitness in Men Aged 42 to 60 Years With and Without Cardiovascular Disease	cross-sectional	Finland		KIHD	1984-1989 (baseline) FU through 1998			Study determinants of di- rectly measured cardiorespiratory fitness, including age, chronic diseases, use of medications, biochemical factors, body weight, and several health habits such as physical activity, cigarette smoking, alcohol consumption, and nutri- tion, in a population-based sample of middle-aged men, and whether the relative importance of these factors differs with respect to age and…	936	The study population is a ran- dom sample of men living in the town of Kuopio or neighbouring rural communities, stratified and bal- anced according to age, and who were 42, 48, 54, or 60 years old at the baseline examination.	men in Eastern Finland	death, serious disease, or migration away from the area,	2,682 (82%) agreed to partici- pate in the study.	NR	men in Eastern Finland	42-60	0	VO2max (ml/min)		cycle	maximal	NR	NR	linear increase in the workload by 20 W/minute breath-by-breath analyses		Waist-to-hip circumference ratio				x							ratio waist circumference to hip circumference	Heart rate at maximal exercise (beats/min), Weight (kg), Heart rate at rest (beats/min), Age (yrs.), Intensity of conditioning physical activity (METs)‡,Intake of carbohydrates (g/day), Fasting serum insulin (mud/L), CHD (yes vs no), Frequency of conditioning physical activity (session/week), Asthma (yes vs no), Haemoglobin (g/dl), FEV1	x			x		x
47	241		2009	Laukkanen	Determinants of Cardiorespiratory Fitness in Men Aged 42 to 60 Years With and Without Cardiovascular Disease	cross-sectional	Finland		KIHD	1984-1989 (baseline) FU through 1998			Study determinants of di- rectly measured cardiorespiratory fitness, including age, chronic diseases, use of medications, biochemical factors, body weight, and several health habits such as physical activity, cigarette smoking, alcohol consumption, and nutri- tion, in a population-based sample of middle-aged men, and whether the relative importance of these factors differs with respect to age and…	936	The study population is a ran- dom sample of men living in the town of Kuopio or neighbouring rural communities, stratified and bal- anced according to age, and who were 42, 48, 54, or 60 years old at the baseline examination.	men in Eastern Finland	death, serious disease, or migration away from the area,	2,682 (82%) agreed to partici- pate in the study.	NR	men in Eastern Finland	42-60	0	VO2max (ml/min)		cycle	maximal	NR	NR	linear increase in the workload by 20 W/minute breath-by-breath analyses		CHD (yes vs no)								x			self report	Heart rate at maximal exercise (beats/min), Weight (kg), Heart rate at rest (beats/min), Age (yrs.), Intensity of conditioning physical activity (METs)‡,Intake of carbohydrates (g/day), Fasting serum insulin (mud/L), Waist-to-hip circumference ratio, Frequency of conditioning physical activity (session/week), Asthma (yes vs no), Haemoglobin (g/dl), FEV1	x			x		x
47	242		2009	Laukkanen	Determinants of Cardiorespiratory Fitness in Men Aged 42 to 60 Years With and Without Cardiovascular Disease	cross-sectional	Finland		KIHD	1984-1989 (baseline) FU through 1998			Study determinants of di- rectly measured cardiorespiratory fitness, including age, chronic diseases, use of medications, biochemical factors, body weight, and several health habits such as physical activity, cigarette smoking, alcohol consumption, and nutri- tion, in a population-based sample of middle-aged men, and whether the relative importance of these factors differs with respect to age and…	936	The study population is a ran- dom sample of men living in the town of Kuopio or neighbouring rural communities, stratified and bal- anced according to age, and who were 42, 48, 54, or 60 years old at the baseline examination.	men in Eastern Finland	death, serious disease, or migration away from the area,	2,682 (82%) agreed to partici- pate in the study.	NR	men in Eastern Finland	42-60	0	VO2max (ml/min)		cycle	maximal	NR	NR	linear increase in the workload by 20 W/minute breath-by-breath analyses		Frequency of conditioning physical activity (session/week)						x					Physical activity was categorized according to type: (1) conditioning physical activity—walking (mean intensity 4.3 METs, range 3.0 to 7.0), jogging (10.2 METs, 7.0 to 12.5), skiing (9.6 METs, 7.0 to 12.5), bicycling (5.9 METs, 4.0 to 9.0), swimming (5.4 METs, 4.0 to 10.0), rowing (5.4 METs, 3.0 to 10.0), ball games (6.7 METs, 4.9 to 9.0), and gym- nastics, dancing, or weight lifting (4.9 METs, 3…	Heart rate at maximal exercise (beats/min), Weight (kg), Heart rate at rest (beats/min), Age (yrs.), Intensity of conditioning physical activity (METs)‡,Intake of carbohydrates (g/day), Fasting serum insulin (mud/L), Waist-to-hip circumference ratio, CHD (yes vs no), Asthma (yes vs no), Haemoglobin (g/dl), FEV1	x			x		x
47	243		2009	Laukkanen	Determinants of Cardiorespiratory Fitness in Men Aged 42 to 60 Years With and Without Cardiovascular Disease	cross-sectional	Finland		KIHD	1984-1989 (baseline) FU through 1998			Study determinants of di- rectly measured cardiorespiratory fitness, including age, chronic diseases, use of medications, biochemical factors, body weight, and several health habits such as physical activity, cigarette smoking, alcohol consumption, and nutri- tion, in a population-based sample of middle-aged men, and whether the relative importance of these factors differs with respect to age and…	936	The study population is a ran- dom sample of men living in the town of Kuopio or neighbouring rural communities, stratified and bal- anced according to age, and who were 42, 48, 54, or 60 years old at the baseline examination.	men in Eastern Finland	death, serious disease, or migration away from the area,	2,682 (82%) agreed to partici- pate in the study.	NR	men in Eastern Finland	42-60	0	VO2max (ml/min)		cycle	maximal	NR	NR	linear increase in the workload by 20 W/minute breath-by-breath analyses		Asthma (yes vs no)								x			self report	Heart rate at maximal exercise (beats/min), Weight (kg), Heart rate at rest (beats/min), Age (yrs.), Intensity of conditioning physical activity (METs)‡,Intake of carbohydrates (g/day), Fasting serum insulin (mud/L), Waist-to-hip circumference ratio, CHD (yes vs no), Frequency of conditioning physical activity (session/week), Haemoglobin (g/dl), FEV1	x			x		x
47	244		2009	Laukkanen	Determinants of Cardiorespiratory Fitness in Men Aged 42 to 60 Years With and Without Cardiovascular Disease	cross-sectional	Finland		KIHD	1984-1989 (baseline) FU through 1998			Study determinants of di- rectly measured cardiorespiratory fitness, including age, chronic diseases, use of medications, biochemical factors, body weight, and several health habits such as physical activity, cigarette smoking, alcohol consumption, and nutri- tion, in a population-based sample of middle-aged men, and whether the relative importance of these factors differs with respect to age and…	936	The study population is a ran- dom sample of men living in the town of Kuopio or neighbouring rural communities, stratified and bal- anced according to age, and who were 42, 48, 54, or 60 years old at the baseline examination.	men in Eastern Finland	death, serious disease, or migration away from the area,	2,682 (82%) agreed to partici- pate in the study.	NR	men in Eastern Finland	42-60	0	VO2max (ml/min)		cycle	maximal	NR	NR	linear increase in the workload by 20 W/minute breath-by-breath analyses		Haemoglobin (g/dl)									x		Blood hemo- globin was measured photometrically (Gilford Stasar III, Gilford Instrument Laboratories, Oberlin, Ohio) using the cyanmethemoglobin method within a few hours of blood sampling.	Heart rate at maximal exercise (beats/min), Weight (kg), Heart rate at rest (beats/min), Age (yrs.), Intensity of conditioning physical activity (METs)‡,Intake of carbohydrates (g/day), Fasting serum insulin (mud/L), Waist-to-hip circumference ratio, CHD (yes vs no), Frequency of conditioning physical activity (session/week), Asthma (yes vs no), FEV1	x			x		x
47	245		2009	Laukkanen	Determinants of Cardiorespiratory Fitness in Men Aged 42 to 60 Years With and Without Cardiovascular Disease	cross-sectional	Finland		KIHD	1984-1989 (baseline) FU through 1998			Study determinants of di- rectly measured cardiorespiratory fitness, including age, chronic diseases, use of medications, biochemical factors, body weight, and several health habits such as physical activity, cigarette smoking, alcohol consumption, and nutri- tion, in a population-based sample of middle-aged men, and whether the relative importance of these factors differs with respect to age and…	936	The study population is a ran- dom sample of men living in the town of Kuopio or neighbouring rural communities, stratified and bal- anced according to age, and who were 42, 48, 54, or 60 years old at the baseline examination.	men in Eastern Finland	death, serious disease, or migration away from the area,	2,682 (82%) agreed to partici- pate in the study.	NR	men in Eastern Finland	42-60	0	VO2max (ml/min)		cycle	maximal	NR	NR	linear increase in the workload by 20 W/minute breath-by-breath analyses		FEV1										x	Pulmonary function was measured using a Medikro 101 spirometer.	Heart rate at maximal exercise (beats/min), Weight (kg), Heart rate at rest (beats/min), Age (yrs.), Intensity of conditioning physical activity (METs)‡,Intake of carbohydrates (g/day), Fasting serum insulin (mud/L), Waist-to-hip circumference ratio, CHD (yes vs no), Frequency of conditioning physical activity (session/week), Asthma (yes vs no), Haemoglobin (g/dl)	x			x		x
48	246	x	2002	Lefevre	Relation between cardiovascular risk factors at adult age, and physical activity during youth and adulthood: the Leuven Longitudinal Study on Lifestyle, Fitness and Health	cross-sectional	Belgium	EU	The Leuven Longitudinal Study on Lifestyle, Fitness and Health (LLSLFH )	1996	Medium	0.488889	analyse the relationship between cardiovascular risk factors at adult age (40 years), and sports participation during youth and physical activity during adulthood.	166	a multi-stage cluster sampling procedure was chosen. In the first stage, a proportionate stratified sample with schools as the primary sampling units was selected. The following four stratification factors were operationalized: language group [Dutch (Flemish) or French], type of schooling (vocational or humanities), school body [private (i.e. Roman Catholic) or state], and geographic distribution…	Boys between the age of 13 and 18 attending secondary school	NR	NR	0.72	Adult Men in Leuven	40	0	VO2max (l/min)	.	cycle	maximal	NR	NR	Individual: Hollman and Venrath	x	Energy Expenditure active leisure time First, during phase 1 (adoles-cence), a sports participation inventory was carried out. The sports activities were recorded by a standardised questionnaire [25] by means of a retrospective approach: sports activities dur- ing the past year were registered. From the reported time and frequency of sports participation, a global average score of hours per week …						x					self report (kcal/kg/wk)	NA
48	247		2002	Lefevre	Relation between cardiovascular risk factors at adult age, and physical activity during youth and adulthood: the Leuven Longitudinal Study on Lifestyle, Fitness and Health	cross-sectional	Belgium		The Leuven Longitudinal Study on Lifestyle, Fitness and Health (LLSLFH )	1996			analyse the relationship between cardiovascular risk factors at adult age (40 years), and sports participation during youth and physical activity during adulthood.	166	a multi-stage cluster sampling procedure was chosen. In the first stage, a proportionate stratified sample with schools as the primary sampling units was selected. The following four stratification factors were operationalized: language group [Dutch (Flemish) or French], type of schooling (vocational or humanities), school body [private (i.e. Roman Catholic) or state], and geographic distribution…	Boys between the age of 13 and 18 attending secondary school	NR	NR	0.72	Adult Men in Leuven	40	0	VO2max (l/min)		cycle	maximal	NR	NR	Individual: Hollman and Venrath		Active leisure time index						x					self report (MET value)	NA
49	248	x	1998	MacAuley	Levels of Physical Activity, Physical Fitness and their Relationship in the Northern Leland Health and Activity Survey	cross-sectional	UK	EU	Northern Ireland Health and Activity Survey	Feb-Nov. 1992	Low	0.802326	Describe the physical activity and physical fitness profile of the population of Northern Ireland and to explore the relationship between physical activity and physical fitness.	481	2 stage probability sampling: The first stage was a sample of 1600 addresses taken from the Northern Ireland Rating and Valuation lists, stratified by region to ensure proportional sampling across the Province. The second stage was carried out by the interviewers so that one person was selected in each household using a Kish grid random selection procedure [21] to avoid any chance of self selecti…	1600 addresses taken from the Northern Ireland Rating and Valuation lists,	those between the ages of 16 years and 74 years	0.7	NA	adult population (aged 16 years or over) of Northern Ireland	16-74	0.48	VO2max (ml/kg/min)	.	treadmill	submaximal	NR	The main exclusions for the treadmill test were an inability to walk on the treadmill, inability to tolerate the mouthpiece, abnormal pre-test ECG. or meeting predetermined medical exclusion criteria. These medical criteria included those with pre-existing cardiac disease, angina or recent myocardial infarction (acute myocardial infarction within the last 6 months). Those with cardiac dysrhythmia…	Individual: Allied Dunbar Protocols breath-by-breath analyses	x	habitual activity: level 0: none level 1: 1-4 occasions of at least moderate activity level 2: 5-11 occasions of at least moderate activity level 3: 12+ occasions of moderate (no vigorous) activity level 4: 12+ occasions mixed moderate and vigorous activity level 5: 12+ occasions vigorous activity						x					self report	age & BMI	x			x
49	249		1998	MacAuley	Levels of Physical Activity, Physical Fitness and their Relationship in the Northern Leland Health and Activity Survey	cross-sectional	UK		Northern Ireland Health and Activity Survey	Feb-Nov. 1992			Describe the physical activity and physical fitness profile of the population of Northern Ireland and to explore the relationship between physical activity and physical fitness.	481	2 stage probability sampling: The first stage was a sample of 1600 addresses taken from the Northern Ireland Rating and Valuation lists, stratified by region to ensure proportional sampling across the Province. The second stage was carried out by the interviewers so that one person was selected in each household using a Kish grid random selection procedure [21] to avoid any chance of self selecti…	1600 addresses taken from the Northern Ireland Rating and Valuation lists,	those between the ages of 16 years and 74 years	0.33	NA	adult population (aged 16 years or over) of Northern Ireland	16-74	0.48	VO2max (ml/kg/min)		treadmill	submaximal	NR	The main exclusions for the treadmill test were an inability to walk on the treadmill, inability to tolerate the mouthpiece, abnormal pre-test ECG. or meeting predetermined medical exclusion criteria. These medical criteria included those with pre-existing cardiac disease, angina or recent myocardial infarction (acute myocardial infarction within the last 6 months). Those with cardiac dysrhythmia…	Individual: Allied Dunbar Protocols breath-by-breath analyses		highest recorded activity (previous 4 weeks): vigorous moderate light none						x					self report	age & BMI	x			x
49	250		1998	MacAuley	Levels of Physical Activity, Physical Fitness and their Relationship in the Northern Leland Health and Activity Survey	cross-sectional	UK		Northern Ireland Health and Activity Survey	Feb-Nov. 1992			Describe the physical activity and physical fitness profile of the population of Northern Ireland and to explore the relationship between physical activity and physical fitness.	481	2 stage probability sampling: The first stage was a sample of 1600 addresses taken from the Northern Ireland Rating and Valuation lists, stratified by region to ensure proportional sampling across the Province. The second stage was carried out by the interviewers so that one person was selected in each household using a Kish grid random selection procedure [21] to avoid any chance of self selecti…	1600 addresses taken from the Northern Ireland Rating and Valuation lists,	those between the ages of 16 years and 74 years	0.33	NA	adult population (aged 16 years or over) of Northern Ireland	16-74	0.48	VO2max (ml/kg/min)		treadmill	submaximal	NR	The main exclusions for the treadmill test were an inability to walk on the treadmill, inability to tolerate the mouthpiece, abnormal pre-test ECG. or meeting predetermined medical exclusion criteria. These medical criteria included those with pre-existing cardiac disease, angina or recent myocardial infarction (acute myocardial infarction within the last 6 months). Those with cardiac dysrhythmia…	Individual: Allied Dunbar Protocols breath-by-breath analyses		past participation (since age of 14, number of years participating in vigorous or moderate sporting activities on a regular basis.)						x					self report	age & BMI	x			x
49	251		1998	MacAuley	Levels of Physical Activity, Physical Fitness and their Relationship in the Northern Leland Health and Activity Survey	cross-sectional	UK		Northern Ireland Health and Activity Survey	Feb-Nov. 1992			Describe the physical activity and physical fitness profile of the population of Northern Ireland and to explore the relationship between physical activity and physical fitness.	481	2 stage probability sampling: The first stage was a sample of 1600 addresses taken from the Northern Ireland Rating and Valuation lists, stratified by region to ensure proportional sampling across the Province. The second stage was carried out by the interviewers so that one person was selected in each household using a Kish grid random selection procedure [21] to avoid any chance of self selecti…	1600 addresses taken from the Northern Ireland Rating and Valuation lists,	those between the ages of 16 years and 74 years	0.33	NA	adult population (aged 16 years or over) of Northern Ireland	16-74	0.48	VO2max (ml/kg/min)		treadmill	submaximal	NR	The main exclusions for the treadmill test were an inability to walk on the treadmill, inability to tolerate the mouthpiece, abnormal pre-test ECG. or meeting predetermined medical exclusion criteria. These medical criteria included those with pre-existing cardiac disease, angina or recent myocardial infarction (acute myocardial infarction within the last 6 months). Those with cardiac dysrhythmia…	Individual: Allied Dunbar Protocols breath-by-breath analyses		habitual activity: level 0: none level 1: 1-4 occasions of at least moderate activity level 2: 5-11 occasions of at least moderate activity level 3: 12+ occasions of moderate (no vigorous) activity level 4: 12+ occasions mixed moderate and vigorous activity level 5: 12+ occasions vigorous activity						x					self report	age, BMI, alcohol intake, smoking, educational level, social class, mean blood pressure and diet	x			x	x
49	252		1998	MacAuley	Levels of Physical Activity, Physical Fitness and their Relationship in the Northern Leland Health and Activity Survey	cross-sectional	UK		Northern Ireland Health and Activity Survey	Feb-Nov. 1992			Describe the physical activity and physical fitness profile of the population of Northern Ireland and to explore the relationship between physical activity and physical fitness.	481	2 stage probability sampling: The first stage was a sample of 1600 addresses taken from the Northern Ireland Rating and Valuation lists, stratified by region to ensure proportional sampling across the Province. The second stage was carried out by the interviewers so that one person was selected in each household using a Kish grid random selection procedure [21] to avoid any chance of self selecti…	1600 addresses taken from the Northern Ireland Rating and Valuation lists,	those between the ages of 16 years and 74 years	0.33	NA	adult population (aged 16 years or over) of Northern Ireland	16-74	0.48	VO2max (ml/kg/min)		treadmill	submaximal	NR	The main exclusions for the treadmill test were an inability to walk on the treadmill, inability to tolerate the mouthpiece, abnormal pre-test ECG. or meeting predetermined medical exclusion criteria. These medical criteria included those with pre-existing cardiac disease, angina or recent myocardial infarction (acute myocardial infarction within the last 6 months). Those with cardiac dysrhythmia…	Individual: Allied Dunbar Protocols breath-by-breath analyses		highest recorded activity (previous 4 weeks): vigorous moderate light none						x					self report	age, BMI, alcohol intake, smoking, educational level, social class, mean blood pressure and diet	x			x	x
49	253		1998	MacAuley	Levels of Physical Activity, Physical Fitness and their Relationship in the Northern Leland Health and Activity Survey	cross-sectional	UK		Northern Ireland Health and Activity Survey	Feb-Nov. 1992			Describe the physical activity and physical fitness profile of the population of Northern Ireland and to explore the relationship between physical activity and physical fitness.	481	2 stage probability sampling: The first stage was a sample of 1600 addresses taken from the Northern Ireland Rating and Valuation lists, stratified by region to ensure proportional sampling across the Province. The second stage was carried out by the interviewers so that one person was selected in each household using a Kish grid random selection procedure [21] to avoid any chance of self selecti…	1600 addresses taken from the Northern Ireland Rating and Valuation lists,	those between the ages of 16 years and 74 years	0.33	NA	adult population (aged 16 years or over) of Northern Ireland	16-74	0.48	VO2max (ml/kg/min)		treadmill	submaximal	NR	The main exclusions for the treadmill test were an inability to walk on the treadmill, inability to tolerate the mouthpiece, abnormal pre-test ECG. or meeting predetermined medical exclusion criteria. These medical criteria included those with pre-existing cardiac disease, angina or recent myocardial infarction (acute myocardial infarction within the last 6 months). Those with cardiac dysrhythmia…	Individual: Allied Dunbar Protocols breath-by-breath analyses		past participation (since age of 14, number of years participating in vigorous or moderate sporting activities on a regular basis.)						x					self report	age, BMI, alcohol intake, smoking, educational level, social class, mean blood pressure and diet	x			x	x
50	254	x	2009	Mainous	Relation of Serum Ferritin Level to Cardiovascular Fitness Among Young Men	cross-sectional	US	NoA	NHANES	1999-2002	Low	0.895349	examine the relation between body iron stores as represented by serum ferritin and CVF in a nationally representative sample of healthy young adult men.	1030	complex survey design: Samples are weighted using sampling weights calculated by taking into account unequal probabilities of selection due to sample design and planned oversampling, then matched to known population control totals to be representative of the United States population.	Adult men aged 20 to 40 years	NR	NR	NR	noninstitutionalized adults aged 20-49	20-49	0	VO2max (ml/kg/min)	.	treadmill	submaximal	The study was limited to men. Hispanics, non-Hispanic whites, and non-Hispanic blacks were included,	Participants were excluded from testing on the basis of the presence of certain cardiovascular conditions, pulmonary conditions, medications, physical limitations, and other medical conditions.4 Exclusions for the CVF test included a history of congestive heart failure, myocardial infarction, coronary artery disease, stroke, angina, systolic blood pressure at rest ⬎180 mm Hg, diastolic blood pres…	NHANES 1-8	.	elevated serum ferritin >300ng/ml									x		Serum ferritin was used as a measure of body iron stores and was measured using the QuantImune Ferritin IRMA kit (Bio-Rad Laboratories, Hercules, California), a single-incubation, 2-site radioimmunoassay.5,	age, race(ethnicity), BMI, anaemia, exercise, CRP, smoking and blood donation	x		x	x		x
51	255	x	1985	Makrides	Maximal short term exercise capacity in healthy subjects aged 15-70 years	cross-sectional	Canada	NoA	NA	NR	Medium	0.536585	measure power output and related variables during a brief period of maximal exercise in healthy subjects aged 15-71 years. In addition to providing data related to normal values of maximum exercise capacity the study compared results obtained with this procedure, with measurements of maximal oxygen intake in a standard progressive incremental exercise test, to examine possible associations betwee…	100	Recruitment was by advertisement in local publications and a local radio station; responders were asked their age and height and recruited into the study if a vacancy existed in their respective category;	age and height	athletes (past or present), and history of serious cardiac or pulmonary disease. At the time of the study spirometric evidence of significant airflow obstruction 0 2 SD below predicted values), abnormal resting electrocardiograph, medications known to influence exercise performance, and systemic hypertension (resting blood pressure of 150/90 mmHg or above) constituted additional exclusion criteri…	NR	NA	healthy adults aged 15-71	15-71	0.5	VO2max (ml/kg/min)	.	cycle	maximal	same as study	two older subjects were excluded on the basis of electrocardiographic changes consistent with coronary artery disease.	Mccartney Protocol (http://www.physiology.org/doi/pdf/10.1152/jappl.1983.55.1.212) gas analyses	x	Wtot										x	The output from the strain gauges was sampled at 10ms intervals by a laboratory computer (PDP 11-03, Digital Equipment Corp.) that performed integration with respect to time. Measurements were obtained in each subject of peak instantaneous power, average power and work for each pedal revolution, and total cumulative work during the test.	vital capacity, leisure time physical activity						x
51	256		1985	Makrides	Maximal short term exercise capacity in healthy subjects aged 15-70 years	cross-sectional	Canada		NA	NR			measure power output and related variables during a brief period of maximal exercise in healthy subjects aged 15-71 years. In addition to providing data related to normal values of maximum exercise capacity the study compared results obtained with this procedure, with measurements of maximal oxygen intake in a standard progressive incremental exercise test, to examine possible associations betwee…	100	Recruitment was by advertisement in local publications and a local radio station; responders were asked their age and height and recruited into the study if a vacancy existed in their respective category;	age and height	athletes (past or present), and history of serious cardiac or pulmonary disease. At the time of the study spirometric evidence of significant airflow obstruction 0 2 SD below predicted values), abnormal resting electrocardiograph, medications known to influence exercise performance, and systemic hypertension (resting blood pressure of 150/90 mmHg or above) constituted additional exclusion criteri…	NR	NA	healthy adults aged 15-71	15-71	0.5	VO2max (ml/kg/min)		cycle	maximal	same as study	two older subjects were excluded on the basis of electrocardiographic changes consistent with coronary artery disease.	Mccartney Protocol (http://www.physiology.org/doi/pdf/10.1152/jappl.1983.55.1.212) gas analyses		Vital capacity (l)										x	dry spirometer	height, age, sex, weight, leisure time PA	x	x		x		x
51	257		1985	Makrides	Maximal short term exercise capacity in healthy subjects aged 15-70 years	cross-sectional	Canada		NA	NR			measure power output and related variables during a brief period of maximal exercise in healthy subjects aged 15-71 years. In addition to providing data related to normal values of maximum exercise capacity the study compared results obtained with this procedure, with measurements of maximal oxygen intake in a standard progressive incremental exercise test, to examine possible associations betwee…	100	Recruitment was by advertisement in local publications and a local radio station; responders were asked their age and height and recruited into the study if a vacancy existed in their respective category;	age and height	athletes (past or present), and history of serious cardiac or pulmonary disease. At the time of the study spirometric evidence of significant airflow obstruction 0 2 SD below predicted values), abnormal resting electrocardiograph, medications known to influence exercise performance, and systemic hypertension (resting blood pressure of 150/90 mmHg or above) constituted additional exclusion criteri…	NR	NA	healthy adults aged 15-71	15-71	0.5	VO2max (ml/kg/min)		cycle	maximal	same as study	two older subjects were excluded on the basis of electrocardiographic changes consistent with coronary artery disease.	Mccartney Protocol (http://www.physiology.org/doi/pdf/10.1152/jappl.1983.55.1.212) gas analyses		leisure time PA (<1;1-3;3-6;>6)						x					questionaire	height, age, sex, weight, leisure time PA	x	x		x		x
51	258		1985	Makrides	Maximal short term exercise capacity in healthy subjects aged 15-70 years	cross-sectional	Canada		NA	NR			measure power output and related variables during a brief period of maximal exercise in healthy subjects aged 15-71 years. In addition to providing data related to normal values of maximum exercise capacity the study compared results obtained with this procedure, with measurements of maximal oxygen intake in a standard progressive incremental exercise test, to examine possible associations betwee…	100	Recruitment was by advertisement in local publications and a local radio station; responders were asked their age and height and recruited into the study if a vacancy existed in their respective category;	age and height	athletes (past or present), and history of serious cardiac or pulmonary disease. At the time of the study spirometric evidence of significant airflow obstruction 0 2 SD below predicted values), abnormal resting electrocardiograph, medications known to influence exercise performance, and systemic hypertension (resting blood pressure of 150/90 mmHg or above) constituted additional exclusion criteri…	NR	NA	healthy adults aged 15-71	15-71	0.5	VO2max (ml/kg/min)		cycle	maximal	same as study	two older subjects were excluded on the basis of electrocardiographic changes consistent with coronary artery disease.	Mccartney Protocol (http://www.physiology.org/doi/pdf/10.1152/jappl.1983.55.1.212) gas analyses		Wtot										x	The output from the strain gauges was sampled at 10ms intervals by a laboratory computer (PDP 11-03, Digital Equipment Corp.) that performed integration with respect to time. Measurements were obtained in each subject of peak instantaneous power, average power and work for each pedal revolution, and total cumulative work during the test.	height, age, sex, weight, leisure time PA	x	x		x		x
51	259		1985	Makrides	Maximal short term exercise capacity in healthy subjects aged 15-70 years	cross-sectional	Canada		NA	NR			measure power output and related variables during a brief period of maximal exercise in healthy subjects aged 15-71 years. In addition to providing data related to normal values of maximum exercise capacity the study compared results obtained with this procedure, with measurements of maximal oxygen intake in a standard progressive incremental exercise test, to examine possible associations betwee…	100	Recruitment was by advertisement in local publications and a local radio station; responders were asked their age and height and recruited into the study if a vacancy existed in their respective category;	age and height	athletes (past or present), and history of serious cardiac or pulmonary disease. At the time of the study spirometric evidence of significant airflow obstruction 0 2 SD below predicted values), abnormal resting electrocardiograph, medications known to influence exercise performance, and systemic hypertension (resting blood pressure of 150/90 mmHg or above) constituted additional exclusion criteri…	NR	NA	healthy adults aged 15-71	15-71	0.5	VO2max (ml/kg/min)		cycle	maximal	same as study	two older subjects were excluded on the basis of electrocardiographic changes consistent with coronary artery disease.	Mccartney Protocol (http://www.physiology.org/doi/pdf/10.1152/jappl.1983.55.1.212) gas analyses		height (cm)				x							NR	height, age, sex, weight, leisure time PA	x	x		x		x
51	260		1985	Makrides	Maximal short term exercise capacity in healthy subjects aged 15-70 years	cross-sectional	Canada		NA	NR			measure power output and related variables during a brief period of maximal exercise in healthy subjects aged 15-71 years. In addition to providing data related to normal values of maximum exercise capacity the study compared results obtained with this procedure, with measurements of maximal oxygen intake in a standard progressive incremental exercise test, to examine possible associations betwee…	100	Recruitment was by advertisement in local publications and a local radio station; responders were asked their age and height and recruited into the study if a vacancy existed in their respective category;	age and height	athletes (past or present), and history of serious cardiac or pulmonary disease. At the time of the study spirometric evidence of significant airflow obstruction 0 2 SD below predicted values), abnormal resting electrocardiograph, medications known to influence exercise performance, and systemic hypertension (resting blood pressure of 150/90 mmHg or above) constituted additional exclusion criteri…	NR	NA	healthy adults aged 15-71	15-71	0.5	VO2max (ml/kg/min)		cycle	maximal	same as study	two older subjects were excluded on the basis of electrocardiographic changes consistent with coronary artery disease.	Mccartney Protocol (http://www.physiology.org/doi/pdf/10.1152/jappl.1983.55.1.212) gas analyses		age (y)	x											height, age, sex, weight, leisure time PA	x	x		x		x
51	261		1985	Makrides	Maximal short term exercise capacity in healthy subjects aged 15-70 years	cross-sectional	Canada		NA	NR			measure power output and related variables during a brief period of maximal exercise in healthy subjects aged 15-71 years. In addition to providing data related to normal values of maximum exercise capacity the study compared results obtained with this procedure, with measurements of maximal oxygen intake in a standard progressive incremental exercise test, to examine possible associations betwee…	100	Recruitment was by advertisement in local publications and a local radio station; responders were asked their age and height and recruited into the study if a vacancy existed in their respective category;	age and height	athletes (past or present), and history of serious cardiac or pulmonary disease. At the time of the study spirometric evidence of significant airflow obstruction 0 2 SD below predicted values), abnormal resting electrocardiograph, medications known to influence exercise performance, and systemic hypertension (resting blood pressure of 150/90 mmHg or above) constituted additional exclusion criteri…	NR	NA	healthy adults aged 15-71	15-71	0.5	VO2max (ml/kg/min)		cycle	maximal	same as study	two older subjects were excluded on the basis of electrocardiographic changes consistent with coronary artery disease.	Mccartney Protocol (http://www.physiology.org/doi/pdf/10.1152/jappl.1983.55.1.212) gas analyses		sex		x								x		height, age, sex, weight, leisure time PA	x	x		x		x
51	262		1985	Makrides	Maximal short term exercise capacity in healthy subjects aged 15-70 years	cross-sectional	Canada		NA	NR			measure power output and related variables during a brief period of maximal exercise in healthy subjects aged 15-71 years. In addition to providing data related to normal values of maximum exercise capacity the study compared results obtained with this procedure, with measurements of maximal oxygen intake in a standard progressive incremental exercise test, to examine possible associations betwee…	100	Recruitment was by advertisement in local publications and a local radio station; responders were asked their age and height and recruited into the study if a vacancy existed in their respective category;	age and height	athletes (past or present), and history of serious cardiac or pulmonary disease. At the time of the study spirometric evidence of significant airflow obstruction 0 2 SD below predicted values), abnormal resting electrocardiograph, medications known to influence exercise performance, and systemic hypertension (resting blood pressure of 150/90 mmHg or above) constituted additional exclusion criteri…	NR	NA	healthy adults aged 15-71	15-71	0.5	VO2max (ml/kg/min)		cycle	maximal	same as study	two older subjects were excluded on the basis of electrocardiographic changes consistent with coronary artery disease.	Mccartney Protocol (http://www.physiology.org/doi/pdf/10.1152/jappl.1983.55.1.212) gas analyses		weight (kg)				x							NR	height, age, sex, weight, leisure time PA	x	x		x		x
51	263		1985	Makrides	Maximal short term exercise capacity in healthy subjects aged 15-70 years	cross-sectional	Canada		NA	NR			measure power output and related variables during a brief period of maximal exercise in healthy subjects aged 15-71 years. In addition to providing data related to normal values of maximum exercise capacity the study compared results obtained with this procedure, with measurements of maximal oxygen intake in a standard progressive incremental exercise test, to examine possible associations betwee…	100	Recruitment was by advertisement in local publications and a local radio station; responders were asked their age and height and recruited into the study if a vacancy existed in their respective category;	age and height	athletes (past or present), and history of serious cardiac or pulmonary disease. At the time of the study spirometric evidence of significant airflow obstruction 0 2 SD below predicted values), abnormal resting electrocardiograph, medications known to influence exercise performance, and systemic hypertension (resting blood pressure of 150/90 mmHg or above) constituted additional exclusion criteri…	NR	NA	healthy adults aged 15-71	15-71	0.5	VO2max (ml/kg/min)		cycle	maximal	same as study	two older subjects were excluded on the basis of electrocardiographic changes consistent with coronary artery disease.	Mccartney Protocol (http://www.physiology.org/doi/pdf/10.1152/jappl.1983.55.1.212) gas analyses		leisure time PA (<1;1-3;3-6;>6)										x	questionaire	height, age, sex, weight, leisure time PA	x	x		x		x
52	264	x	2009	Nokes	Relationship between physical activity and aerobic fitness	cross-sectional	US	NoA	NA	NR	High	0.390244	(1) quantify the association between objectively measured PA volume (Pav) Intensity (PaI) and CRF and (2) evaluate the effects of potential confounders including percent bodyfat on the association between PAV, PAI and CRF	275	newspaper advertisement recruitment	women living in 20 cities in the Mountain West region of the US	smoker, obese with BMI>30kg/m2, PAR-Q evaluated apparently healthy	NR	NA	healthy women	mean age 40.1±3	1	VO2max (ml/kg/min)	.	treadmill	maximal	same as study	NR	George protocol ACSM 1995 guidelines gas analyses	x	physical activity volume (PAV)						x					accelerometer	age, % body fat, PA intensity,	x			x		x
52	265		2009	Nokes	Relationship between physical activity and aerobic fitness	cross-sectional	US		NA	NR			(1) quantify the association between objectively measured PA volume (Pav) Intensity (PaI) and CRF and (2) evaluate the effects of potential confounders including percent bodyfat on the association between PAV, PAI and CRF	275	newspaper advertisement recruitment	women living in 20 cities in the Mountain West region of the US	smoker, obese with BMI>30kg/m2, PAR-Q evaluated apparently healthy	NR	NA	healthy women	mean age 40.1±3	1	VO2max (ml/kg/min)		treadmill	maximal	same as study	NR	George protocol ACSM 1995 guidelines gas analyses		physical activity volume (PAV)						x					accelerometer	age, % body fat, PA intensity,	x			x		x
52	266		2009	Nokes	Relationship between physical activity and aerobic fitness	cross-sectional	US		NA	NR			(1) quantify the association between objectively measured PA volume (Pav) Intensity (PaI) and CRF and (2) evaluate the effects of potential confounders including percent bodyfat on the association between PAV, PAI and CRF	275	newspaper advertisement recruitment	women living in 20 cities in the Mountain West region of the US	smoker, obese with BMI>30kg/m2, PAR-Q evaluated apparently healthy	NR	NA	healthy women	mean age 40.1±3	1	VO2max (ml/kg/min)		treadmill	maximal	same as study	NR	George protocol ACSM 1995 guidelines gas analyses		physical activity volume (PAV)						x					accelerometer	age, % body fat, PA intensity,	x			x		x
52	267		2009	Nokes	Relationship between physical activity and aerobic fitness	cross-sectional	US		NA	NR			(1) quantify the association between objectively measured PA volume (Pav) Intensity (PaI) and CRF and (2) evaluate the effects of potential confounders including percent bodyfat on the association between PAV, PAI and CRF	275	newspaper advertisement recruitment	women living in 20 cities in the Mountain West region of the US	smoker, obese with BMI>30kg/m2, PAR-Q evaluated apparently healthy	NR	NA	healthy women	mean age 40.1±3	1	VO2max (ml/kg/min)		treadmill	maximal	same as study	NR	George protocol ACSM 1995 guidelines gas analyses		physical activity volume (PAV)						x					accelerometer	age, % body fat, PA intensity,	x			x		x
52	268		2009	Nokes	Relationship between physical activity and aerobic fitness	cross-sectional	US		NA	NR			(1) quantify the association between objectively measured PA volume (Pav) Intensity (PaI) and CRF and (2) evaluate the effects of potential confounders including percent bodyfat on the association between PAV, PAI and CRF	275	newspaper advertisement recruitment	women living in 20 cities in the Mountain West region of the US	smoker, obese with BMI>30kg/m2, PAR-Q evaluated apparently healthy	NR	NA	healthy women	mean age 40.1±3	1	VO2max (ml/kg/min)		treadmill	maximal	same as study	NR	George protocol ACSM 1995 guidelines gas analyses		physical activity volume (PAV)						x					accelerometer	age, % body fat, PA intensity,	x			x		x
52	269		2009	Nokes	Relationship between physical activity and aerobic fitness	cross-sectional	US		NA	NR			(1) quantify the association between objectively measured PA volume (Pav) Intensity (PaI) and CRF and (2) evaluate the effects of potential confounders including percent bodyfat on the association between PAV, PAI and CRF	275	newspaper advertisement recruitment	women living in 20 cities in the Mountain West region of the US	smoker, obese with BMI>30kg/m2, PAR-Q evaluated apparently healthy	NR	NA	healthy women	mean age 40.1±3	1	VO2max (ml/kg/min)		treadmill	maximal	same as study	NR	George protocol ACSM 1995 guidelines gas analyses		physical activity volume (PAV)						x					accelerometer	age, % body fat, PA intensity,	x			x		x
52	270		2009	Nokes	Relationship between physical activity and aerobic fitness	cross-sectional	US		NA	NR			(1) quantify the association between objectively measured PA volume (Pav) Intensity (PaI) and CRF and (2) evaluate the effects of potential confounders including percent bodyfat on the association between PAV, PAI and CRF	275	newspaper advertisement recruitment	women living in 20 cities in the Mountain West region of the US	smoker, obese with BMI>30kg/m2, PAR-Q evaluated apparently healthy	NR	NA	healthy women	mean age 40.1±3	1	VO2max (ml/kg/min)		treadmill	maximal	same as study	NR	George protocol ACSM 1995 guidelines gas analyses		physical activity volume (PAV)						x					accelerometer	age, % body fat, PA intensity,	x			x		x
52	271		2009	Nokes	Relationship between physical activity and aerobic fitness	cross-sectional	US		NA	NR			(1) quantify the association between objectively measured PA volume (Pav) Intensity (PaI) and CRF and (2) evaluate the effects of potential confounders including percent bodyfat on the association between PAV, PAI and CRF	275	newspaper advertisement recruitment	women living in 20 cities in the Mountain West region of the US	smoker, obese with BMI>30kg/m2, PAR-Q evaluated apparently healthy	NR	NA	healthy women	mean age 40.1±3	1	VO2max (ml/kg/min)		treadmill	maximal	same as study	NR	George protocol ACSM 1995 guidelines gas analyses		physical activity volume (PAV)						x					accelerometer	age, % body fat, PA intensity,	x			x		x
53	272	x	1979	Plowman	Age and Aerobic Power in Women: a Longitudinal Study	longitudinal	US	NoA	NA	1969-1974	High	0.372093	gather longitudinal data about the maximal performance of both sedentary and active, occupationally diverse females and to compare these data with those reported in a cross sectional analysis of age and Vo2max	36	recruitment from participants of original cross sectional study where participants were recruited from Santa Barbara County, CA	Participation in original cross sectional study of women from Santa Barbara County, CA	ECG responses or locomotion problems during the initial tests.	0.68	0.37	females from the general population	18-68	1	VO2max (ml/kg/min)	x	treadmill	maximal	same as study	ECG responses or locomotion problems during the initial tests.	Balke gas analyses	x	age	x										self report	NA
53	273		1979	Plowman	Age and Aerobic Power in Women: a Longitudinal Study	cross-sectional	US		NA	1969-1974			gather longitudinal data about the maximal performance of both sedentary and active, occupationally diverse females and to compare these data with those reported in a cross sectional analysis of age and Vo2max	36	recruitment from participants of original cross sectional study where participants were recruited from Santa Barbara County, CA	Participation in original cross sectional study of women from Santa Barbara County, CA	ECG responses or locomotion problems during the initial tests.	0.68	0.37	females from the general population	18-68	1	VO2max (ml/kg/min)		treadmill	maximal	same as study	ECG responses or locomotion problems during the initial tests.	Balke gas analyses		age	x										self report	NA
53	274		1979	Plowman	Age and Aerobic Power in Women: a Longitudinal Study	cross-sectional	US		NA	1969-1974			gather longitudinal data about the maximal performance of both sedentary and active, occupationally diverse females and to compare these data with those reported in a cross sectional analysis of age and Vo2max	36	recruitment from participants of original cross sectional study where participants were recruited from Santa Barbara County, CA	Participation in original cross sectional study of women from Santa Barbara County, CA	ECG responses or locomotion problems during the initial tests.	0.68	0.37	females from the general population	18-68	1	VO2max (ml/kg/min)		treadmill	maximal	same as study	ECG responses or locomotion problems during the initial tests.	Balke gas analyses		age	x										self report	NA
54	275	x	2007	Sanada	Effects of age on ventilatory threshold and peak oxygen uptake normalised for regional skeletal muscle mass in Japanese men and women aged 20-80 years	cross-sectional	Japan	AS	NA	NR	High	0.390244	(1) to investigate the effects of age on cardiorespiratory fitness normalised for regional skeletal muscle (SM) mass. (2) to determine the relevance of ventilatory threshhold (VT) normalised to SM mass based on age and gender.	1463	Convenience sample (not explicitly stated) from fitness club	Healthy Japanese adults	Significant cardiovascular or pulmonary disease, uncontrolled metabolic disease (diabetes, anaemia, or thyroid disease), or electrolyte abnormalities.	NR	NA	Healthy Japanese adults	20-80	0.448	VO2max (ml/kg/min)	.	treadmill	submaximal	NR	NR	individual (based on American College of Sports Medicine 1990); breath-by-breath analyses	x	Age (years)	x										self report	NA
54	276		2007	Sanada	Effects of age on ventilatory threshold and peak oxygen uptake normalised for regional skeletal muscle mass in Japanese men and women aged 20-80 years	cross-sectional	Japan		NA	NR			(1) to investigate the effects of age on cardiorespiratory fitness normalised for regional skeletal muscle (SM) mass. (2) to determine the relevance of ventilatory threshhold (VT) normalised to SM mass based on age and gender.	1463	Convenience sample (not explicitly stated) from fitness club	Healthy Japanese adults	Significant cardiovascular or pulmonary disease, uncontrolled metabolic disease (diabetes, anaemia, or thyroid disease), or electrolyte abnormalities.	NR	NA	Healthy Japanese adults	20-80	0.448	VT (ventilatory threshold)		treadmill	submaximal	NR	NR	individual (based on American College of Sports Medicine 1990); breath-by-breath analyses		Age (years) (755(m)/612(f)	x										self report	NA
54	277		2007	Sanada	Effects of age on ventilatory threshold and peak oxygen uptake normalised for regional skeletal muscle mass in Japanese men and women aged 20-80 years	cross-sectional	Japan		NA	NR			(1) to investigate the effects of age on cardiorespiratory fitness normalised for regional skeletal muscle (SM) mass. (2) to determine the relevance of ventilatory threshhold (VT) normalised to SM mass based on age and gender.	1463	Convenience sample (not explicitly stated) from fitness club	Healthy Japanese adults	Significant cardiovascular or pulmonary disease, uncontrolled metabolic disease (diabetes, anaemia, or thyroid disease), or electrolyte abnormalities.	NR	NA	Healthy Japanese adults	20-80	0.448	VO2max (ml/kg/min)		treadmill	submaximal	NR	NR	individual (based on American College of Sports Medicine 1990); breath-by-breath analyses		Skeletal muscle mass (kg) (Men n = 755; Women n = 620)				x							SM was derived from measurement of Muscle Thickness (MTH), which was determined by B-mode ultrasound was assessed at six sites on the anterior and posterior surfaces of the body. Total and regional SM mass were estimated using the equations of Sanada et al. (2005). The MTHs were converted to mass units in kilograms by ultrasound derived prediction equations using site-matched MTH x height, which …	NA
54	278		2007	Sanada	Effects of age on ventilatory threshold and peak oxygen uptake normalised for regional skeletal muscle mass in Japanese men and women aged 20-80 years	cross-sectional	Japan		NA	NR			(1) to investigate the effects of age on cardiorespiratory fitness normalised for regional skeletal muscle (SM) mass. (2) to determine the relevance of ventilatory threshhold (VT) normalised to SM mass based on age and gender.	1463	Convenience sample (not explicitly stated) from fitness club	Healthy Japanese adults	Significant cardiovascular or pulmonary disease, uncontrolled metabolic disease (diabetes, anaemia, or thyroid disease), or electrolyte abnormalities.	NR	NA	Healthy Japanese adults	20-80	0.448	VT (ventilatory threshold)		treadmill	submaximal	NR	NR	individual (based on American College of Sports Medicine 1990); breath-by-breath analyses		Skeletal muscle mass (kg) (Men n = 755; Women n = 612)				x							SM was derived from measurement of Muscle Thickness (MTH), which was determined by B-mode ultrasound was assessed at six sites on the anterior and posterior surfaces of the body. Total and regional SM mass were estimated using the equations of Sanada et al. (2005). The MTHs were converted to mass units in kilograms by ultrasound derived prediction equations using site-matched MTH x height, which …	NA
55	279	x	1995	Sandvik	Long term effects of smoking on physical fitness and lung function: a longitudinal study of 1393 middle aged Norwegian men for seven years	longitudinal	Norway	EU	NA	1972, 1980	Medium	0.465116	Determine the association between smoking habits and long term decline in physical fitness and lung function in healthy middle aged men	1393	recruited from five select companies in Oslo, Norway	apparently healthy men	no known or suspected heart disease, diabetes, cancer, hypertension treated with drugs, and additional diseases	0.86	0.91	apparently healthy men working in five corporations in Oslo, Norway	40-59	0	maximal working capacity (watts)	x	cycle	maximal	same as study	NA	Individual gas analyses	x	smoking							x				self report	initial fitness, age, PA	x					x
56	280	x	1997	Seccareccia	Determinants of physical performance at cycle-ergometer in healthy middle aged men in Italy	cross-sectional	Italy	EU	ECCIS	NR	Medium	0.662791	describe the association between personal characteristics and physical fitness in healthy middle aged men	3893	participation in occupational groups from private companies, government offices and agencies whose work was a majority of the time clerical in nature	NA	clinical diagnosis of heart disease except subjects with high blood pressure but without heart failure or major arrhythmia, chest pain with effort or at rest, cardiac ischemia, handicap preventing full performance, cancer, liver cirrhosis, chronic bronchitis, abnormal QQS waves or left bundle branch block at base line ECG, chronotropic incompetence at exercise testing, inotropic incompetence at e…	66.3	NA	men enrolled from 9 occupational groups from clerical jobs	40-59	0	work load	.	cycle	maximal	same as study	same as study	Individual	.	age	x										self report	BMI, resting pulse rate, mean BP, cigarettes, HDL cholesterol, non-HDL cholesterol, physical exercise				x		x
56	281		1997	Seccareccia	Determinants of physical performance at cycle-ergometer in healthy middle aged men in Italy	cross-sectional	Italy		ECCIS	NR			describe the association between personal characteristics and physical fitness in healthy middle aged men	3893	participation in occupational groups from private companies, government offices and agencies whose work was a majority of the time clerical in nature	NA	clinical diagnosis of heart disease except subjects with high blood pressure but without heart failure or major arrhythmia, chest pain with effort or at rest, cardiac ischemia, handicap preventing full performance, cancer, liver cirrhosis, chronic bronchitis, abnormal QQS waves or left bundle branch block at base line ECG, chronotropic incompetence at exercise testing, inotropic incompetence at e…	66.3	NA	men enrolled from 9 occupational groups from clerical jobs	40-59	0	work load		cycle	maximal	same as study	same as study	Individual		BMI				x							weight in kg/height in m2	age, resting pulse rate, mean BP, cigarettes, HDL cholesterol, non-HDL cholesterol, physical exercise		x		x		x
56	282		1997	Seccareccia	Determinants of physical performance at cycle-ergometer in healthy middle aged men in Italy	cross-sectional	Italy		ECCIS	NR			describe the association between personal characteristics and physical fitness in healthy middle aged men	3893	participation in occupational groups from private companies, government offices and agencies whose work was a majority of the time clerical in nature	NA	clinical diagnosis of heart disease except subjects with high blood pressure but without heart failure or major arrhythmia, chest pain with effort or at rest, cardiac ischemia, handicap preventing full performance, cancer, liver cirrhosis, chronic bronchitis, abnormal QQS waves or left bundle branch block at base line ECG, chronotropic incompetence at exercise testing, inotropic incompetence at e…	66.3	NA	men enrolled from 9 occupational groups from clerical jobs	40-59	0	work load		cycle	maximal	same as study	same as study	Individual		Resting Pulse rate				x							twelve standard electrocardiographic leds	age, BMI, mean BP, cigarettes, HDL cholesterol, non-HDL cholesterol, physical exercise		x		x		x
56	283		1997	Seccareccia	Determinants of physical performance at cycle-ergometer in healthy middle aged men in Italy	cross-sectional	Italy		ECCIS	NR			describe the association between personal characteristics and physical fitness in healthy middle aged men	3893	participation in occupational groups from private companies, government offices and agencies whose work was a majority of the time clerical in nature	NA	clinical diagnosis of heart disease except subjects with high blood pressure but without heart failure or major arrhythmia, chest pain with effort or at rest, cardiac ischemia, handicap preventing full performance, cancer, liver cirrhosis, chronic bronchitis, abnormal QQS waves or left bundle branch block at base line ECG, chronotropic incompetence at exercise testing, inotropic incompetence at e…	66.3	NA	men enrolled from 9 occupational groups from clerical jobs	40-59	0	work load		cycle	maximal	same as study	same as study	Individual		Mean BP				x							diastolic blood pressure +(systolic-diastolic)/3, measured every 3 minutes during exercise	age, BMI, resting pulse rate, cigarettes, HDL cholesterol, non-HDL cholesterol, physical exercise		x		x		x
56	284		1997	Seccareccia	Determinants of physical performance at cycle-ergometer in healthy middle aged men in Italy	cross-sectional	Italy		ECCIS	NR			describe the association between personal characteristics and physical fitness in healthy middle aged men	3893	participation in occupational groups from private companies, government offices and agencies whose work was a majority of the time clerical in nature	NA	clinical diagnosis of heart disease except subjects with high blood pressure but without heart failure or major arrhythmia, chest pain with effort or at rest, cardiac ischemia, handicap preventing full performance, cancer, liver cirrhosis, chronic bronchitis, abnormal QQS waves or left bundle branch block at base line ECG, chronotropic incompetence at exercise testing, inotropic incompetence at e…	66.3	NA	men enrolled from 9 occupational groups from clerical jobs	40-59	0	work load		cycle	maximal	same as study	same as study	Individual		Cigarettes							x				self report	age, BMI, resting pulse rate, mean BP, HDL cholesterol, non-HDL cholesterol, physical exercise		x		x		x
56	285		1997	Seccareccia	Determinants of physical performance at cycle-ergometer in healthy middle aged men in Italy	cross-sectional	Italy		ECCIS	NR			describe the association between personal characteristics and physical fitness in healthy middle aged men	3893	participation in occupational groups from private companies, government offices and agencies whose work was a majority of the time clerical in nature	NA	clinical diagnosis of heart disease except subjects with high blood pressure but without heart failure or major arrhythmia, chest pain with effort or at rest, cardiac ischemia, handicap preventing full performance, cancer, liver cirrhosis, chronic bronchitis, abnormal QQS waves or left bundle branch block at base line ECG, chronotropic incompetence at exercise testing, inotropic incompetence at e…	66.3	NA	men enrolled from 9 occupational groups from clerical jobs	40-59	0	work load		cycle	maximal	same as study	same as study	Individual		HDL Cholesterol									x		measured under international control	age, BMI, resting pulse rate, mean BP, cigarettes, non-HDL cholesterol, physical exercise		x		x		x
56	286		1997	Seccareccia	Determinants of physical performance at cycle-ergometer in healthy middle aged men in Italy	cross-sectional	Italy		ECCIS	NR			describe the association between personal characteristics and physical fitness in healthy middle aged men	3893	participation in occupational groups from private companies, government offices and agencies whose work was a majority of the time clerical in nature	NA	clinical diagnosis of heart disease except subjects with high blood pressure but without heart failure or major arrhythmia, chest pain with effort or at rest, cardiac ischemia, handicap preventing full performance, cancer, liver cirrhosis, chronic bronchitis, abnormal QQS waves or left bundle branch block at base line ECG, chronotropic incompetence at exercise testing, inotropic incompetence at e…	66.3	NA	men enrolled from 9 occupational groups from clerical jobs	40-59	0	work load		cycle	maximal	same as study	same as study	Individual		Non HDL Cholesterol									x		total-HDL cholesterol	age, BMI, resting pulse rate, mean BP, cigarettes, HDL cholesterol, physical exercise		x		x		x
56	287		1997	Seccareccia	Determinants of physical performance at cycle-ergometer in healthy middle aged men in Italy	cross-sectional	Italy		ECCIS	NR			describe the association between personal characteristics and physical fitness in healthy middle aged men	3893	participation in occupational groups from private companies, government offices and agencies whose work was a majority of the time clerical in nature	NA	clinical diagnosis of heart disease except subjects with high blood pressure but without heart failure or major arrhythmia, chest pain with effort or at rest, cardiac ischemia, handicap preventing full performance, cancer, liver cirrhosis, chronic bronchitis, abnormal QQS waves or left bundle branch block at base line ECG, chronotropic incompetence at exercise testing, inotropic incompetence at e…	66.3	NA	men enrolled from 9 occupational groups from clerical jobs	40-59	0	work load		cycle	maximal	same as study	same as study	Individual		Physical Exercise						x					self report	age, BMI, resting pulse rate, mean BP, cigarettes, HDL cholesterol, non-HDL cholesterol		x		x
56	288		1997	Seccareccia	Determinants of physical performance at cycle-ergometer in healthy middle aged men in Italy	cross-sectional	Italy		ECCIS	NR			describe the association between personal characteristics and physical fitness in healthy middle aged men	3893	participation in occupational groups from private companies, government offices and agencies whose work was a majority of the time clerical in nature	NA	clinical diagnosis of heart disease except subjects with high blood pressure but without heart failure or major arrhythmia, chest pain with effort or at rest, cardiac ischemia, handicap preventing full performance, cancer, liver cirrhosis, chronic bronchitis, abnormal QQS waves or left bundle branch block at base line ECG, chronotropic incompetence at exercise testing, inotropic incompetence at e…	66.3	NA	men enrolled from 9 occupational groups from clerical jobs	40-59	0	Test Duration		cycle	maximal	same as study	same as study	Individual		age	x										self report	BMI, resting pulse rate, mean BP, cigarettes, HDL cholesterol, non-HDL cholesterol, physical exercise				x		x
56	289		1997	Seccareccia	Determinants of physical performance at cycle-ergometer in healthy middle aged men in Italy	cross-sectional	Italy		ECCIS	NR			describe the association between personal characteristics and physical fitness in healthy middle aged men	3893	participation in occupational groups from private companies, government offices and agencies whose work was a majority of the time clerical in nature	NA	clinical diagnosis of heart disease except subjects with high blood pressure but without heart failure or major arrhythmia, chest pain with effort or at rest, cardiac ischemia, handicap preventing full performance, cancer, liver cirrhosis, chronic bronchitis, abnormal QQS waves or left bundle branch block at base line ECG, chronotropic incompetence at exercise testing, inotropic incompetence at e…	66.3	NA	men enrolled from 9 occupational groups from clerical jobs	40-59	0	Test Duration		cycle	maximal	same as study	same as study	Individual		BMI				x							weight in kg/height in m2	age, resting pulse rate, mean BP, cigarettes, HDL cholesterol, non-HDL cholesterol, physical exercise		x		x		x
56	290		1997	Seccareccia	Determinants of physical performance at cycle-ergometer in healthy middle aged men in Italy	cross-sectional	Italy		ECCIS	NR			describe the association between personal characteristics and physical fitness in healthy middle aged men	3893	participation in occupational groups from private companies, government offices and agencies whose work was a majority of the time clerical in nature	NA	clinical diagnosis of heart disease except subjects with high blood pressure but without heart failure or major arrhythmia, chest pain with effort or at rest, cardiac ischemia, handicap preventing full performance, cancer, liver cirrhosis, chronic bronchitis, abnormal QQS waves or left bundle branch block at base line ECG, chronotropic incompetence at exercise testing, inotropic incompetence at e…	66.3	NA	men enrolled from 9 occupational groups from clerical jobs	40-59	0	Test Duration		cycle	maximal	same as study	same as study	Individual		Resting Pulse rate				x							twelve standard electrocardiographic leds	age, BMI, mean BP, cigarettes, HDL cholesterol, non-HDL cholesterol, physical exercise		x		x		x
56	291		1997	Seccareccia	Determinants of physical performance at cycle-ergometer in healthy middle aged men in Italy	cross-sectional	Italy		ECCIS	NR			describe the association between personal characteristics and physical fitness in healthy middle aged men	3893	participation in occupational groups from private companies, government offices and agencies whose work was a majority of the time clerical in nature	NA	clinical diagnosis of heart disease except subjects with high blood pressure but without heart failure or major arrhythmia, chest pain with effort or at rest, cardiac ischemia, handicap preventing full performance, cancer, liver cirrhosis, chronic bronchitis, abnormal QQS waves or left bundle branch block at base line ECG, chronotropic incompetence at exercise testing, inotropic incompetence at e…	66.3	NA	men enrolled from 9 occupational groups from clerical jobs	40-59	0	Test Duration		cycle	maximal	same as study	same as study	Individual		Mean BP				x							diastolic blood pressure +(systolic-diastolic)/3, measured every 3 minutes during exercise	age, BMI, resting pulse rate, cigarettes, HDL cholesterol, non-HDL cholesterol, physical exercise		x		x		x
56	292		1997	Seccareccia	Determinants of physical performance at cycle-ergometer in healthy middle aged men in Italy	cross-sectional	Italy		ECCIS	NR			describe the association between personal characteristics and physical fitness in healthy middle aged men	3893	participation in occupational groups from private companies, government offices and agencies whose work was a majority of the time clerical in nature	NA	clinical diagnosis of heart disease except subjects with high blood pressure but without heart failure or major arrhythmia, chest pain with effort or at rest, cardiac ischemia, handicap preventing full performance, cancer, liver cirrhosis, chronic bronchitis, abnormal QQS waves or left bundle branch block at base line ECG, chronotropic incompetence at exercise testing, inotropic incompetence at e…	66.3	NA	men enrolled from 9 occupational groups from clerical jobs	40-59	0	Test Duration		cycle	maximal	same as study	same as study	Individual		Cigarettes							x				self report	age, BMI, resting pulse rate, mean BP, HDL cholesterol, non-HDL cholesterol, physical exercise		x		x		x
56	293		1997	Seccareccia	Determinants of physical performance at cycle-ergometer in healthy middle aged men in Italy	cross-sectional	Italy		ECCIS	NR			describe the association between personal characteristics and physical fitness in healthy middle aged men	3893	participation in occupational groups from private companies, government offices and agencies whose work was a majority of the time clerical in nature	NA	clinical diagnosis of heart disease except subjects with high blood pressure but without heart failure or major arrhythmia, chest pain with effort or at rest, cardiac ischemia, handicap preventing full performance, cancer, liver cirrhosis, chronic bronchitis, abnormal QQS waves or left bundle branch block at base line ECG, chronotropic incompetence at exercise testing, inotropic incompetence at e…	66.3	NA	men enrolled from 9 occupational groups from clerical jobs	40-59	0	Test Duration		cycle	maximal	same as study	same as study	Individual		HDL Cholesterol									x		measured under international control	age, BMI, resting pulse rate, mean BP, cigarettes, non-HDL cholesterol, physical exercise		x		x		x
56	294		1997	Seccareccia	Determinants of physical performance at cycle-ergometer in healthy middle aged men in Italy	cross-sectional	Italy		ECCIS	NR			describe the association between personal characteristics and physical fitness in healthy middle aged men	3893	participation in occupational groups from private companies, government offices and agencies whose work was a majority of the time clerical in nature	NA	clinical diagnosis of heart disease except subjects with high blood pressure but without heart failure or major arrhythmia, chest pain with effort or at rest, cardiac ischemia, handicap preventing full performance, cancer, liver cirrhosis, chronic bronchitis, abnormal QQS waves or left bundle branch block at base line ECG, chronotropic incompetence at exercise testing, inotropic incompetence at e…	66.3	NA	men enrolled from 9 occupational groups from clerical jobs	40-59	0	Test Duration		cycle	maximal	same as study	same as study	Individual		Non HDL Cholesterol									x		total-HDL cholesterol	age, BMI, resting pulse rate, mean BP, cigarettes, HDL cholesterol, physical exercise		x		x		x
56	295		1997	Seccareccia	Determinants of physical performance at cycle-ergometer in healthy middle aged men in Italy	cross-sectional	Italy		ECCIS	NR			describe the association between personal characteristics and physical fitness in healthy middle aged men	3893	participation in occupational groups from private companies, government offices and agencies whose work was a majority of the time clerical in nature	NA	clinical diagnosis of heart disease except subjects with high blood pressure but without heart failure or major arrhythmia, chest pain with effort or at rest, cardiac ischemia, handicap preventing full performance, cancer, liver cirrhosis, chronic bronchitis, abnormal QQS waves or left bundle branch block at base line ECG, chronotropic incompetence at exercise testing, inotropic incompetence at e…	66.3	NA	men enrolled from 9 occupational groups from clerical jobs	40-59	0	Test Duration		cycle	maximal	same as study	same as study	Individual		Physical Exercise						x					self report	age, BMI, resting pulse rate, mean BP, cigarettes, HDL cholesterol, non-HDL cholesterol		x		x
56	296		1997	Seccareccia	Determinants of physical performance at cycle-ergometer in healthy middle aged men in Italy	cross-sectional	Italy		ECCIS	NR			describe the association between personal characteristics and physical fitness in healthy middle aged men	3893	participation in occupational groups from private companies, government offices and agencies whose work was a majority of the time clerical in nature	NA	clinical diagnosis of heart disease except subjects with high blood pressure but without heart failure or major arrhythmia, chest pain with effort or at rest, cardiac ischemia, handicap preventing full performance, cancer, liver cirrhosis, chronic bronchitis, abnormal QQS waves or left bundle branch block at base line ECG, chronotropic incompetence at exercise testing, inotropic incompetence at e…	66.3	NA	men enrolled from 9 occupational groups from clerical jobs	40-59	0	Workload/Heart Rate		cycle	maximal	same as study	same as study	Individual		age	x										self report	BMI, resting pulse rate, mean BP, cigarettes, HDL cholesterol, non-HDL cholesterol, physical exercise				x		x
56	297		1997	Seccareccia	Determinants of physical performance at cycle-ergometer in healthy middle aged men in Italy	cross-sectional	Italy		ECCIS	NR			describe the association between personal characteristics and physical fitness in healthy middle aged men	3893	participation in occupational groups from private companies, government offices and agencies whose work was a majority of the time clerical in nature	NA	clinical diagnosis of heart disease except subjects with high blood pressure but without heart failure or major arrhythmia, chest pain with effort or at rest, cardiac ischemia, handicap preventing full performance, cancer, liver cirrhosis, chronic bronchitis, abnormal QQS waves or left bundle branch block at base line ECG, chronotropic incompetence at exercise testing, inotropic incompetence at e…	66.3	NA	men enrolled from 9 occupational groups from clerical jobs	40-59	0	Workload/Heart Rate		cycle	maximal	same as study	same as study	Individual		BMI				x							weight in kg/height in m2	age, resting pulse rate, mean BP, cigarettes, HDL cholesterol, non-HDL cholesterol, physical exercise		x		x		x
56	298		1997	Seccareccia	Determinants of physical performance at cycle-ergometer in healthy middle aged men in Italy	cross-sectional	Italy		ECCIS	NR			describe the association between personal characteristics and physical fitness in healthy middle aged men	3893	participation in occupational groups from private companies, government offices and agencies whose work was a majority of the time clerical in nature	NA	clinical diagnosis of heart disease except subjects with high blood pressure but without heart failure or major arrhythmia, chest pain with effort or at rest, cardiac ischemia, handicap preventing full performance, cancer, liver cirrhosis, chronic bronchitis, abnormal QQS waves or left bundle branch block at base line ECG, chronotropic incompetence at exercise testing, inotropic incompetence at e…	66.3	NA	men enrolled from 9 occupational groups from clerical jobs	40-59	0	Workload/Heart Rate		cycle	maximal	same as study	same as study	Individual		Resting Pulse rate				x							twelve standard electrocardiographic leds	age, BMI, mean BP, cigarettes, HDL cholesterol, non-HDL cholesterol, physical exercise		x		x		x
56	299		1997	Seccareccia	Determinants of physical performance at cycle-ergometer in healthy middle aged men in Italy	cross-sectional	Italy		ECCIS	NR			describe the association between personal characteristics and physical fitness in healthy middle aged men	3893	participation in occupational groups from private companies, government offices and agencies whose work was a majority of the time clerical in nature	NA	clinical diagnosis of heart disease except subjects with high blood pressure but without heart failure or major arrhythmia, chest pain with effort or at rest, cardiac ischemia, handicap preventing full performance, cancer, liver cirrhosis, chronic bronchitis, abnormal QQS waves or left bundle branch block at base line ECG, chronotropic incompetence at exercise testing, inotropic incompetence at e…	66.3	NA	men enrolled from 9 occupational groups from clerical jobs	40-59	0	Workload/Heart Rate		cycle	maximal	same as study	same as study	Individual		Mean BP				x							diastolic blood pressure +(systolic-diastolic)/3, measured every 3 minutes during exercise	age, BMI, resting pulse rate, cigarettes, HDL cholesterol, non-HDL cholesterol, physical exercise		x		x		x
56	300		1997	Seccareccia	Determinants of physical performance at cycle-ergometer in healthy middle aged men in Italy	cross-sectional	Italy		ECCIS	NR			describe the association between personal characteristics and physical fitness in healthy middle aged men	3893	participation in occupational groups from private companies, government offices and agencies whose work was a majority of the time clerical in nature	NA	clinical diagnosis of heart disease except subjects with high blood pressure but without heart failure or major arrhythmia, chest pain with effort or at rest, cardiac ischemia, handicap preventing full performance, cancer, liver cirrhosis, chronic bronchitis, abnormal QQS waves or left bundle branch block at base line ECG, chronotropic incompetence at exercise testing, inotropic incompetence at e…	66.3	NA	men enrolled from 9 occupational groups from clerical jobs	40-59	0	Workload/Heart Rate		cycle	maximal	same as study	same as study	Individual		Cigarettes							x				self report	age, BMI, resting pulse rate, mean BP, HDL cholesterol, non-HDL cholesterol, physical exercise		x		x		x
56	301		1997	Seccareccia	Determinants of physical performance at cycle-ergometer in healthy middle aged men in Italy	cross-sectional	Italy		ECCIS	NR			describe the association between personal characteristics and physical fitness in healthy middle aged men	3893	participation in occupational groups from private companies, government offices and agencies whose work was a majority of the time clerical in nature	NA	clinical diagnosis of heart disease except subjects with high blood pressure but without heart failure or major arrhythmia, chest pain with effort or at rest, cardiac ischemia, handicap preventing full performance, cancer, liver cirrhosis, chronic bronchitis, abnormal QQS waves or left bundle branch block at base line ECG, chronotropic incompetence at exercise testing, inotropic incompetence at e…	66.3	NA	men enrolled from 9 occupational groups from clerical jobs	40-59	0	Workload/Heart Rate		cycle	maximal	same as study	same as study	Individual		HDL Cholesterol									x		measured under international control	age, BMI, resting pulse rate, mean BP, cigarettes, non-HDL cholesterol, physical exercise		x		x		x
56	302		1997	Seccareccia	Determinants of physical performance at cycle-ergometer in healthy middle aged men in Italy	cross-sectional	Italy		ECCIS	NR			describe the association between personal characteristics and physical fitness in healthy middle aged men	3893	participation in occupational groups from private companies, government offices and agencies whose work was a majority of the time clerical in nature	NA	clinical diagnosis of heart disease except subjects with high blood pressure but without heart failure or major arrhythmia, chest pain with effort or at rest, cardiac ischemia, handicap preventing full performance, cancer, liver cirrhosis, chronic bronchitis, abnormal QQS waves or left bundle branch block at base line ECG, chronotropic incompetence at exercise testing, inotropic incompetence at e…	66.3	NA	men enrolled from 9 occupational groups from clerical jobs	40-59	0	Workload/Heart Rate		cycle	maximal	same as study	same as study	Individual		Non HDL Cholesterol									x		total-HDL cholesterol	age, BMI, resting pulse rate, mean BP, cigarettes, HDL cholesterol, physical exercise		x		x		x
[truncated: 169 more rows]
[truncated: 8 more columns]
